# Supplementary material for: Asymmetric three-component Tsuji–Trost allylation reaction enabled by chiral aldehyde/palladium combined catalysis
Source: Royal Society of Chemistry journal article supplement (doi:10.1039/d4sc02594f), 2024-01-01

## Supplementary Information

*for*

### Asymmetric three-component Tsuji-Trost allylation reaction enabled by chiral aldehyde/palladium combined catalysis

Jian-Hua Liu<sup>[a]</sup>, Wei Wen<sup>[a]</sup>, Zhu-Lian Wu<sup>[a]</sup>, Tian Cai<sup>[a]</sup>, Yan-Min Huang<sup>[b]\*</sup>, Qi-Xiang Guo<sup>[a]\*</sup>  
huangyanmin828@gxtc.edu.com; qxguo@swu.edu.cn

<sup>a</sup> Key Laboratory of Applied Chemistry of Chongqing Municipality, and Chongqing Key Laboratory of Soft-Matter Material Chemistry and Function Manufacturing, School of Chemistry and Chemical Engineering, Southwest University, Chongqing, 400715, China.

<sup>b</sup> Guangxi Key Laboratory of Natural Polymer Chemistry and Physics, Nanning Normal University, Nanning 530001, China.

#### Table of Contents

|                                                                      |    |
|----------------------------------------------------------------------|----|
| 1. General data .....                                                | 2  |
| 2. Reaction condition optimization .....                             | 2  |
| 3. General procedure .....                                           | 9  |
| 4. Determination of the absolute configuration of 4b.....            | 40 |
| 5. Mechanistic Studies.....                                          | 41 |
| 6. References.....                                                   | 47 |
| 7. Copies of <sup>1</sup> H NMR and <sup>13</sup> C NMR spectra..... | 48 |

## 1. General data

All non-aqueous reactions were carried out in a flame-dried glassware under nitrogen atmosphere or in a nitrogen-filled glove box unless otherwise noted. Solvents for reactions were dried appropriately before use: toluene, THF and Et<sub>2</sub>O were dried by refluxing with sodium and benzophenone as indicator, CH<sub>2</sub>Cl<sub>2</sub> and CHCl<sub>3</sub> were dried by refluxing with CaH<sub>2</sub>. All other reagents were directly used as purchased from Aladdin, Adamas-beta<sup>®</sup> and Energy Chemical. <sup>1</sup>H NMR and <sup>13</sup>C NMR spectra were recorded on Bruker Avance 600 MHz spectrometer. Chemical shifts ( $\delta$ ) are reported in ppm from tetramethylsilane (TMS) with the solvent resonance as the internal standard. Proton signal multiplicities are given as s(singlet), d (doublet), t (triplet), q (quartet), m (multiplet), br (broad) or a combination of them. *J*-values are in Hz. HRMS (ESI-Q-TOF) spectra were recorded on Bruker Impact-II mass spectrometer. Enantiomer ratios were determined by HPLC (Chiralpak IF-H, IA-H, OD-H columns were purchased from Daicel Chemical Industries, LTD). Optical rotations were determined at  $\lambda = 589$  nm (sodium D line) by using a Rudolph-API automatic polarimeter. alkenyl iodides,<sup>[1]</sup> amino acid esters<sup>[2,3]</sup> and chiral aldehydes catalysts<sup>[4]</sup> were prepared according to the literature.

## 2. Reaction condition optimization

Table S1: Chiral aldehyde screening<sup>a</sup>

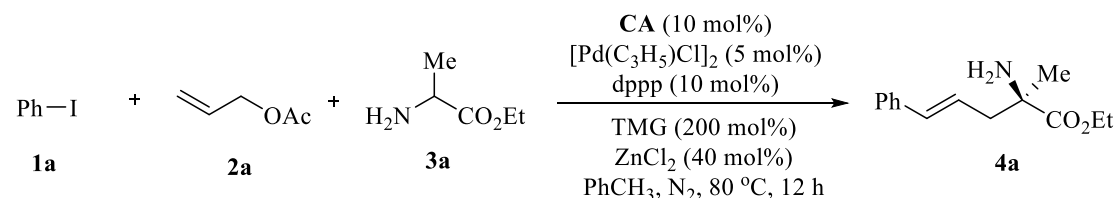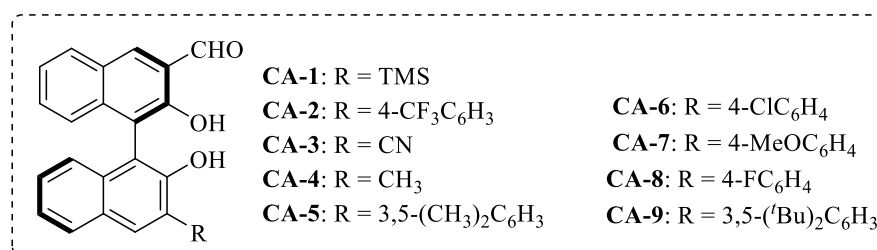

| Entry | CA   | Time(h) | Yield(%) <sup>b</sup> | ee(%) <sup>c</sup> |
|-------|------|---------|-----------------------|--------------------|
| 1     | CA-1 | 12      | 45                    | 71                 |
| 2     | CA-2 | 12      | 29                    | 50                 |
| 3     | CA-3 | 12      | 46                    | 20                 |
| 4     | CA-4 | 12      | 49                    | 65                 |
| 5     | CA-5 | 12      | 31                    | 58                 |
| 6     | CA-6 | 12      | 32                    | 65                 |

|   |             |    |    |    |
|---|-------------|----|----|----|
| 7 | <b>CA-7</b> | 12 | 47 | 60 |
| 8 | <b>CA-8</b> | 12 | 51 | 64 |
| 9 | <b>CA-9</b> | 12 | 43 | 58 |

<sup>a</sup> Unless noted otherwise, reactions were performed with **1a** (0.20 mmol), **2a** (0.30 mmol), **3a** (0.30 mmol), **CA** (0.02 mmol), dppp (0.02 mmol), [Pd(C<sub>3</sub>H<sub>5</sub>)Cl]<sub>2</sub> (0.01 mmol), TMG (0.20 mmol) and ZnCl<sub>2</sub> (0.08 mmol) in PhCH<sub>3</sub> (0.5 mL) at 80 °C. <sup>b</sup> Isolated yield. <sup>c</sup> Determined by chiral HPLC analysis.

**Table S2: Transition-metal screening<sup>a</sup>**

| Entry    | [Pd]                                                  | Time(h)   | Yield(%) <sup>b</sup> | ee(%) <sup>c</sup> |
|----------|-------------------------------------------------------|-----------|-----------------------|--------------------|
| 1        | Pd(OAc) <sub>2</sub>                                  | 12        | 43                    | 40                 |
| 2        | PdCl <sub>2</sub>                                     | 12        | 45                    | 65                 |
| 3        | Pd <sub>2</sub> (dba) <sub>3</sub>                    | 12        | NR                    | n.d. <sup>d</sup>  |
| 4        | Pd(PPh <sub>3</sub> ) <sub>2</sub> Cl <sub>2</sub>    | 12        | 49                    | 65                 |
| 5        | [(CH <sub>3</sub> )CyPd]                              | 12        | 43                    | 66                 |
| 6        | Pd(CO <sub>2</sub> CF <sub>3</sub> ) <sub>2</sub>     | 12        | 38                    | 53                 |
| 7        | Pd(PPh <sub>3</sub> ) <sub>4</sub>                    | 12        | Trace                 | n.d.               |
| <b>8</b> | <b>[Pd(C<sub>3</sub>H<sub>5</sub>)Cl]<sub>2</sub></b> | <b>12</b> | <b>45</b>             | <b>71</b>          |

<sup>a</sup> Unless noted otherwise, reactions were performed with **1a** (0.20 mmol), **2a** (0.30 mmol), **3a** (0.30 mmol), **CA-1** (0.02 mmol), dppp (0.02 mmol), [Pd] (0.01 mmol), TMG (0.20 mmol) and ZnCl<sub>2</sub> (0.08 mmol) in PhCH<sub>3</sub> (0.5 mL) at 80 °C. <sup>b</sup> Isolated yield. <sup>c</sup> Determined by chiral HPLC analysis. <sup>d</sup> n.d. = Not determined.

**Table S3: Base screening<sup>a</sup>**

| Entry     | Base                            | Time(h)   | Yield(%) <sup>b</sup> | ee(%) <sup>c</sup> |
|-----------|---------------------------------|-----------|-----------------------|--------------------|
| 1         | Et <sub>3</sub> N               | 12        | Trace                 | n.d. <sup>d</sup>  |
| 2         | <sup>t</sup> BuOK               | 12        | Trace                 | n.d.               |
| 3         | Metformin                       | 12        | NR                    | n.d.               |
| 4         | 2,2-Dimethylpyrrolidine         | 12        | 35                    | 78                 |
| 5         | Quinuclidine                    | 12        | 31                    | 81                 |
| 6         | DABCO                           | 12        | 29                    | 81                 |
| 7         | TBD                             | 12        | 23                    | 64                 |
| 8         | <sup>t</sup> Bu-TMG             | 12        | 45                    | 58                 |
| 9         | DBN                             | 12        | 32                    | 52                 |
| 10        | DBU                             | 12        | 36                    | 67                 |
| 11        | Cs <sub>2</sub> CO <sub>3</sub> | 12        | NR                    | n.d.               |
| <b>12</b> | <b>TMG</b>                      | <b>12</b> | <b>45</b>             | <b>71</b>          |
| 13        | TDMAIP                          | 12        | 41                    | 61                 |

|    |                        |    |    |    |
|----|------------------------|----|----|----|
| 14 | <sup>t</sup> Bu-TDMAIP | 12 | 43 | 55 |
| 15 |                        | 12 | 36 | 71 |

<sup>a</sup> Unless noted otherwise, reactions were performed with **1a** (0.20 mmol), **2a** (0.30 mmol), **3a** (0.30 mmol), **CA-1** (0.02 mmol), dppp (0.02 mmol), [Pd(C<sub>3</sub>H<sub>5</sub>)Cl]<sub>2</sub> (0.01 mmol), Base (0.20 mmol) and ZnCl<sub>2</sub> (0.08 mmol) in PhCH<sub>3</sub> (0.5 mL) at 80 °C. <sup>b</sup> Isolated yield. <sup>c</sup> Determined by chiral HPLC analysis. <sup>d</sup> n.d. = Not determined.

**Table S4: Solvent screening<sup>a</sup>**

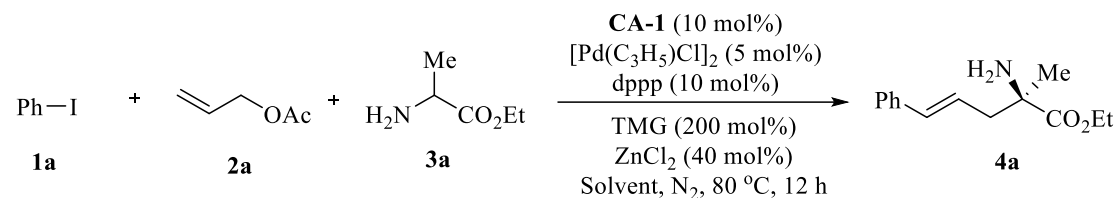

| Entry    | Solvent                 | Time(h)   | Yield(%) <sup>b</sup> | ee(%) <sup>c</sup> |
|----------|-------------------------|-----------|-----------------------|--------------------|
| <b>1</b> | <b>PhCH<sub>3</sub></b> | <b>12</b> | <b>45</b>             | <b>71</b>          |
| 2        | PhCF <sub>3</sub>       | 12        | 55                    | 51                 |
| 3        | Mesitylene              | 12        | 46                    | 64                 |
| 4        | o-Xylene                | 12        | 52                    | 65                 |
| 5        | m-Xylene                | 12        | 52                    | 67                 |
| 6        | p-Xylene                | 12        | 53                    | 67                 |
| 7        | PhCl                    | 12        | 55                    | 56                 |
| 8        | PhEt                    | 12        | 47                    | 66                 |
| 9        | Octane                  | 12        | 56                    | 26                 |
| 10       | 1,2-dioxane             | 12        | 34                    | 55                 |

<sup>a</sup> Unless noted otherwise, reactions were performed with **1a** (0.20 mmol), **2a** (0.30 mmol), **3a** (0.30 mmol), **CA-1** (0.02 mmol), dppp (0.02 mmol), [Pd(C<sub>3</sub>H<sub>5</sub>)Cl]<sub>2</sub> (0.01 mmol), TMG (0.20 mmol) and ZnCl<sub>2</sub> (0.08 mmol) in Solvent (0.5 mL) at 80 °C. <sup>b</sup> Isolated yield. <sup>c</sup> Determined by chiral HPLC analysis.

**Table S5: Achiral ligand screening<sup>a</sup>**

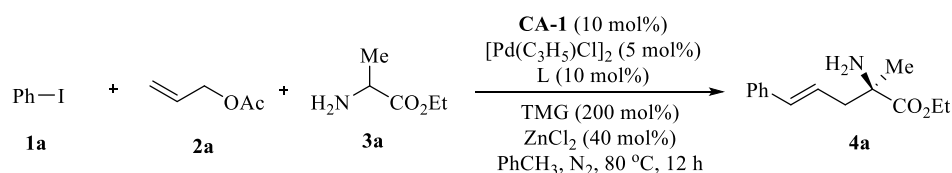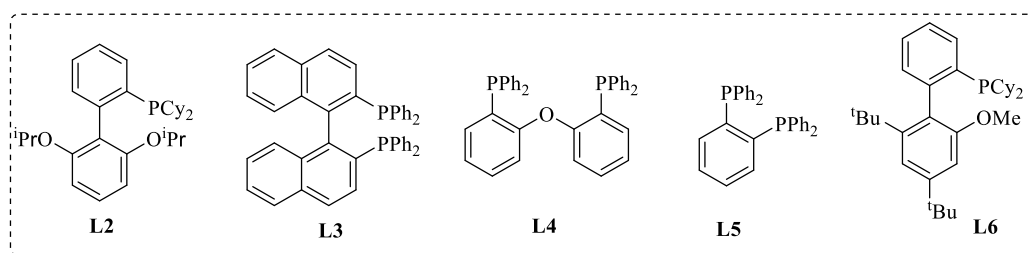

| Entry    | Ligand           | Time(h)   | Yield(%) <sup>b</sup> | ee(%) <sup>c</sup> |
|----------|------------------|-----------|-----------------------|--------------------|
| 1        | PPh <sub>3</sub> | 12        | NR                    | n.d. <sup>d</sup>  |
| 2        | dpppe            | 12        | trace                 | n.d.               |
| 3        | dppf             | 12        | 31                    | 60                 |
| 4        | dppe             | 12        | 52                    | 67                 |
| 5        | dppb             | 12        | 25                    | 76                 |
| <b>6</b> | <b>dppp</b>      | <b>12</b> | <b>45</b>             | <b>71</b>          |

|    |           |    |    |      |
|----|-----------|----|----|------|
| 7  | <b>L2</b> | 12 | 32 | 52   |
| 8  | <b>L3</b> | 12 | 25 | 65   |
| 9  | <b>L4</b> | 12 | 26 | 65   |
| 10 | <b>L5</b> | 12 | NR | n.d. |
| 11 | <b>L6</b> | 12 | 35 | 52   |

<sup>a</sup> Unless noted otherwise, reactions were performed with **1a** (0.20 mmol), **2a** (0.30 mmol), **3a** (0.30 mmol), **CA-1** (0.02 mmol), L (0.02 mmol), [Pd(C<sub>3</sub>H<sub>5</sub>)Cl]<sub>2</sub> (0.01 mmol), TMG (0.20 mmol) and ZnCl<sub>2</sub> (0.08 mmol) in PhCH<sub>3</sub> (0.5 mL) at 80 °C. <sup>b</sup> Isolated yield. <sup>c</sup> Determined by chiral HPLC analysis. <sup>d</sup> n.d. = Not determined.

**Table S6: Lewis acid screening<sup>a</sup>**

| Entry | Lewis acid                                            | Time(h) | Yield(%) <sup>b</sup> | ee(%) <sup>c</sup> |
|-------|-------------------------------------------------------|---------|-----------------------|--------------------|
| 1     | ZnF <sub>2</sub>                                      | 12      | 52                    | 32                 |
| 2     | ZnCl <sub>2</sub>                                     | 12      | 45                    | 71                 |
| 3     | ZnBr <sub>2</sub>                                     | 12      | 55                    | 70                 |
| 4     | ZnI <sub>2</sub>                                      | 12      | 50                    | 56                 |
| 5     | Zn(OAc) <sub>2</sub>                                  | 12      | 51                    | 65                 |
| 6     | Zn(OTf) <sub>2</sub>                                  | 12      | 36                    | 47                 |
| 7     | Zn(ClO <sub>4</sub> ) <sub>2</sub> ·6H <sub>2</sub> O | 12      | 45                    | 61                 |
| 8     | LiCl                                                  | 16      | 32                    | 35                 |
| 9     | LiBr                                                  | 17      | 15                    | 30                 |

<sup>a</sup> Unless noted otherwise, reactions were performed with **1a** (0.20 mmol), **2a** (0.30 mmol), **3a** (0.30 mmol), **CA-1** (0.02 mmol), dppp (0.02 mmol), [Pd(C<sub>3</sub>H<sub>5</sub>)Cl]<sub>2</sub> (0.01 mmol), TMG (0.20 mmol) and Lewis acid (0.08 mmol) in PhCH<sub>3</sub> (0.5 mL) at 80 °C. <sup>b</sup> Isolated yield. <sup>c</sup> Determined by chiral HPLC analysis.

**Table S7: Chiral ligand screening<sup>a</sup>**

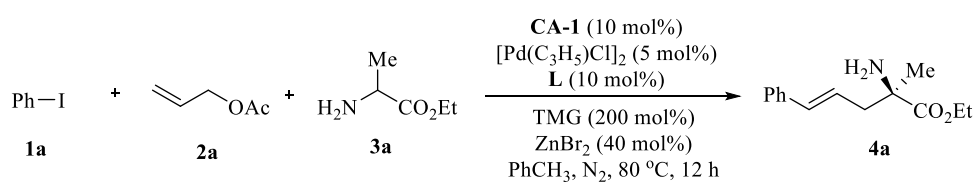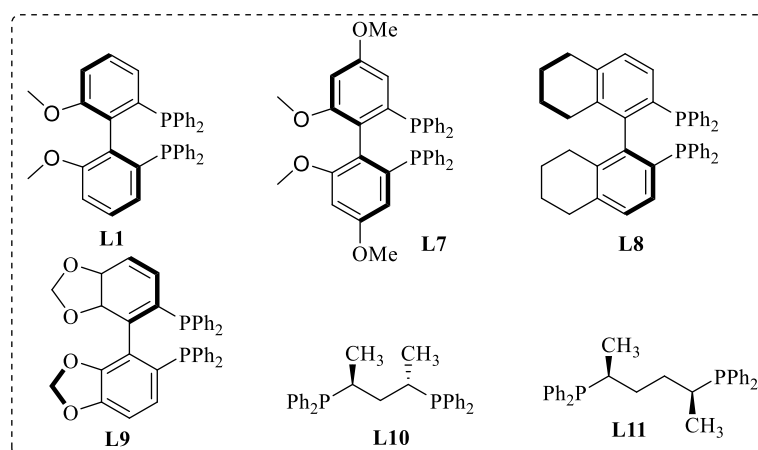

| entry | CA               | ligand | time (h) | yield (%) <sup>b</sup> | ee (%) <sup>c</sup> |
|-------|------------------|--------|----------|------------------------|---------------------|
| 1     | <i>ent</i> -CA-1 | L1     | 12       | 32                     | 16                  |
| 2     | CA-1             | L1     | 12       | 30                     | 88                  |
| 3     | <i>ent</i> -CA-1 | L7     | 12       | 26                     | 29                  |
| 4     | CA-1             | L7     | 12       | 31                     | 75                  |
| 5     | <i>ent</i> -CA-1 | L8     | 12       | 30                     | 21                  |
| 6     | CA-1             | L8     | 12       | 34                     | 75                  |
| 7     | <i>ent</i> -CA-1 | L9     | 12       | 36                     | 77                  |
| 8     | CA-1             | L9     | 12       | 32                     | 11                  |
| 9     | <i>ent</i> -CA-1 | L10    | 12       | 53                     | 63                  |
| 10    | CA-1             | L10    | 12       | 50                     | 63                  |
| 11    | <i>ent</i> -CA-1 | L11    | 12       | 26                     | 70                  |
| 12    | CA-1             | L11    | 12       | 28                     | 70                  |

<sup>a</sup> Unless noted otherwise, reactions were performed with **1a** (0.20 mmol), **2a** (0.30 mmol), **3a** (0.30 mmol), CA-1 (0.02 mmol), L (0.02 mmol), [Pd(C<sub>3</sub>H<sub>5</sub>)Cl]<sub>2</sub> (0.01mmol), TMG (0.20 mmol) and ZnBr<sub>2</sub> (0.08 mmol) in PhCH<sub>3</sub> (0.5 mL) at 80 °C. <sup>b</sup> Isolated yield. <sup>c</sup> Determined by chiral HPLC analysis.

**Table S8: Additive screening<sup>a</sup>**

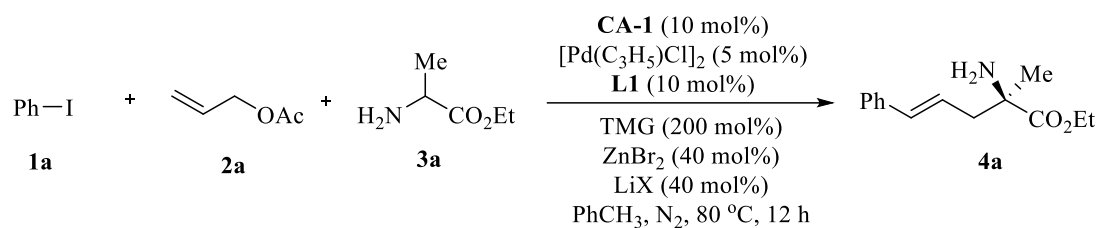

| Entry | LiX                             | Time(h) | Yield(%) <sup>b</sup> | ee(%) <sup>c</sup> |
|-------|---------------------------------|---------|-----------------------|--------------------|
| 1     | LiCl                            | 12      | 49                    | 88                 |
| 2     | LiBr                            | 12      | 53                    | 90                 |
| 3     | LiOTf                           | 12      | 61                    | 88                 |
| 4     | LiBF <sub>4</sub>               | 12      | 56                    | 90                 |
| 5     | Li <sub>2</sub> CO <sub>3</sub> | 12      | 50                    | 90                 |
| 6     | LiOAc                           | 12      | 52                    | 88                 |
| 7     | LiClO <sub>4</sub>              | 12      | 55                    | 82                 |
| 8     | LiOH·H <sub>2</sub> O           | 12      | 51                    | 90                 |

<sup>a</sup> Unless noted otherwise, reactions were performed with **1a** (0.20 mmol), **2a** (0.30 mmol), **3a** (0.30 mmol), CA-1 (0.02 mmol), L1 (0.02 mmol), [Pd(C<sub>3</sub>H<sub>5</sub>)Cl]<sub>2</sub> (0.01mmol), TMG (0.20 mmol), LiX (0.08 mmol) and ZnBr<sub>2</sub> (0.08 mmol) in PhCH<sub>3</sub> (0.5 mL) at 80 °C. <sup>b</sup> Isolated yield. <sup>c</sup> Determined by chiral HPLC analysis.

**Table S9: Reaction temperature screening<sup>a</sup>**

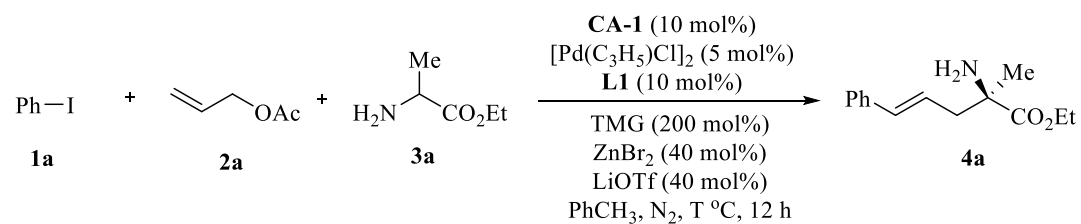

| Entry | T( °C) | Time(h) | Yield(%) <sup>b</sup> | ee(%) <sup>c</sup> |
|-------|--------|---------|-----------------------|--------------------|
| 1     | 90     | 12      | 64                    | 86                 |

|   |    |    |    |    |
|---|----|----|----|----|
| 2 | 80 | 12 | 61 | 88 |
| 3 | 70 | 12 | 56 | 92 |
| 4 | 60 | 12 | 45 | 93 |

<sup>a</sup> Unless noted otherwise, reactions were performed with **1a** (0.20 mmol), **2a** (0.30 mmol), **3a** (0.30 mmol), **CA-1** (0.02 mmol), **L1** (0.02 mmol), [Pd(C<sub>3</sub>H<sub>5</sub>)Cl]<sub>2</sub> (0.01 mmol), TMG (0.20 mmol), LiOTf (0.08 mmol) and ZnBr<sub>2</sub> (0.08 mmol) in PhCH<sub>3</sub> (0.5 mL) at T °C. <sup>b</sup> Isolated yield. <sup>c</sup> Determined by chiral HPLC analysis.

**Table S10: Lewis acid equivalents screening<sup>a</sup>**

| Entry | X   | Time(h) | Yield(%) <sup>b</sup> | ee(%) <sup>c</sup> |
|-------|-----|---------|-----------------------|--------------------|
| 1     | 0   | 12      | 23                    | 3                  |
| 2     | 20  | 12      | 42                    | 84                 |
| 3     | 40  | 12      | 56                    | 92                 |
| 4     | 60  | 12      | 59                    | 90                 |
| 5     | 80  | 12      | 60                    | 89                 |
| 6     | 100 | 12      | 63                    | 90                 |
| 7     | 120 | 12      | 55                    | 81                 |

<sup>a</sup> Unless noted otherwise, reactions were performed with **1a** (0.20 mmol), **2a** (0.30 mmol), **3a** (0.30 mmol), **CA-1** (0.02 mmol), **L1** (0.02 mmol), [Pd(C<sub>3</sub>H<sub>5</sub>)Cl]<sub>2</sub> (0.01 mmol), TMG (0.20 mmol), LiOTf (0.08 mmol) and ZnBr<sub>2</sub> (X mmol) in PhCH<sub>3</sub> (0.5 mL) at 70 °C. <sup>b</sup> Isolated yield. <sup>c</sup> Determined by chiral HPLC analysis.

**Table S11: Base equivalents screening<sup>a</sup>**

| Entry | X   | Time(h) | Yield(%) <sup>b</sup> | ee(%) <sup>c</sup> |
|-------|-----|---------|-----------------------|--------------------|
| 1     | 180 | 12      | 48                    | 88                 |
| 2     | 200 | 12      | 63                    | 90                 |
| 3     | 220 | 12      | 67                    | 89                 |
| 4     | 240 | 12      | 71                    | 87                 |
| 5     | 260 | 12      | 66                    | 85                 |

<sup>a</sup> Unless noted otherwise, reactions were performed with **1a** (0.20 mmol), **2a** (0.30 mmol), **3a** (0.30 mmol), **CA-1** (0.02 mmol), **L1** (0.02 mmol), [Pd(C<sub>3</sub>H<sub>5</sub>)Cl]<sub>2</sub> (0.01 mmol), TMG (X mmol), LiOTf (0.08 mmol) and ZnBr<sub>2</sub> (0.2 mmol) in PhCH<sub>3</sub> (0.5 mL) at 70 °C. <sup>b</sup> Isolated yield. <sup>c</sup> Determined by chiral HPLC analysis.

**Table S12: Leaving group screening<sup>a</sup>**

| Entry | LG                    | Time(h) | Yield(%) <sup>b</sup> | ee(%) <sup>c</sup> |
|-------|-----------------------|---------|-----------------------|--------------------|
| 1     | OAc                   | 12      | 67                    | 89                 |
| 2     | Br                    | 12      | 49                    | 81                 |
| 3     | OCO <sub>2</sub> Ph   | 12      | 69                    | 90                 |
| 4     | OBoc                  | 12      | 56                    | 84                 |
| 5     | O(CO <sub>2</sub> )Et | 12      | 62                    | 90                 |

<sup>a</sup> Unless noted otherwise, reactions were performed with **1a** (0.20 mmol), **2a** (0.30 mmol), **3a** (0.30 mmol), **CA-1** (0.02 mmol), **L1** (0.02 mmol), [Pd(C<sub>3</sub>H<sub>5</sub>)Cl]<sub>2</sub> (0.01 mmol), TMG (0.44 mmol), LiOTf (0.08 mmol) and ZnBr<sub>2</sub> (0.2 mmol) in PhCH<sub>3</sub> (0.5 mL) at 70 °C. <sup>b</sup> Isolated yield. <sup>c</sup> Determined by chiral HPLC analysis.

**Table S13: Alkoxy group screening<sup>a</sup>**

| Entry | R               | Time(h) | Yield(%) <sup>b</sup> | ee(%) <sup>c</sup> |
|-------|-----------------|---------|-----------------------|--------------------|
| 1     | Me              | 12      | 53                    | 88                 |
| 2     | Et              | 12      | 69                    | 90                 |
| 3     | <sup>t</sup> Bu | 12      | 71                    | 96                 |
| 4     | Bn              | 12      | 47                    | 85                 |

<sup>a</sup> Unless noted otherwise, reactions were performed with **1a** (0.20 mmol), **2a** (0.30 mmol), **3a** (0.30 mmol), **CA-1** (0.02 mmol), **L1** (0.02 mmol), [Pd(C<sub>3</sub>H<sub>5</sub>)Cl]<sub>2</sub> (0.01 mmol), TMG (0.44 mmol), LiOTf (0.08 mmol) and ZnBr<sub>2</sub> (0.2 mmol) in PhCH<sub>3</sub> (0.5 mL) at 70 °C. <sup>b</sup> Isolated yield. <sup>c</sup> Determined by chiral HPLC analysis.

**Table S14: Re-screening of the additives<sup>a</sup>**

| Entry | LiX                             | Time(h) | Yield(%) <sup>b</sup> | ee(%) <sup>c</sup> |
|-------|---------------------------------|---------|-----------------------|--------------------|
| 1     | LiCl                            | 12      | 63                    | 95                 |
| 2     | LiBr                            | 12      | 62                    | 95                 |
| 3     | LiOTf                           | 12      | 71                    | 96                 |
| 4     | Li <sub>2</sub> CO <sub>3</sub> | 12      | 70                    | 94                 |
| 5     | LiBF <sub>4</sub>               | 12      | 78                    | 97                 |



|   |                       |    |    |    |
|---|-----------------------|----|----|----|
| 6 | LiOAc                 | 12 | 66 | 93 |
| 7 | LiClO <sub>4</sub>    | 12 | 55 | 88 |
| 8 | LiOH:H <sub>2</sub> O | 12 | 67 | 91 |

<sup>a</sup> Unless noted otherwise, reactions were performed with **1a** (0.20 mmol), **2a** (0.30 mmol), **3a** (0.30 mmol), **CA-1** (0.02 mmol), **L1** (0.02 mmol), [Pd(C<sub>3</sub>H<sub>5</sub>)Cl]<sub>2</sub> (0.01mmol), TMG (0.44 mmol), LiX (0.08 mmol) and ZnBr<sub>2</sub> (0.2 mmol) in PhCH<sub>3</sub> (0.5 mL) at 70 °C. <sup>b</sup> Isolated yield. <sup>c</sup> Determined by chiral HPLC analysis.

**Table S15: Reactant ratio screening<sup>a</sup>**

| Entry | 1b:2a:3b  | Time(h) | Yield(%) <sup>b</sup> | ee(%) <sup>c</sup> |
|-------|-----------|---------|-----------------------|--------------------|
| 1     | 1.2:1:1.5 | 12      | 69                    | 93                 |
| 2     | 1.5:1:1.5 | 12      | 78                    | 97                 |
| 3     | 1.8:1:1.5 | 12      | 81                    | 97                 |
| 4     | 2:1:1.5   | 12      | 77                    | 96                 |

<sup>a</sup> Unless noted otherwise, reactions were performed with **1a** (0.20 mmol), **2a** (0.30 mmol), **3a** (0.30 mmol), **CA-1** (0.02 mmol), **L1** (0.02 mmol), [Pd(C<sub>3</sub>H<sub>5</sub>)Cl]<sub>2</sub> (0.01mmol), TMG (0.44 mmol), LiBF<sub>4</sub> (0.08 mmol) and ZnBr<sub>2</sub> (0.2 mmol) in PhCH<sub>3</sub> (0.5 mL) at 70 °C. <sup>b</sup> Isolated yield. <sup>c</sup> Determined by chiral HPLC analysis.

### 3. General procedure

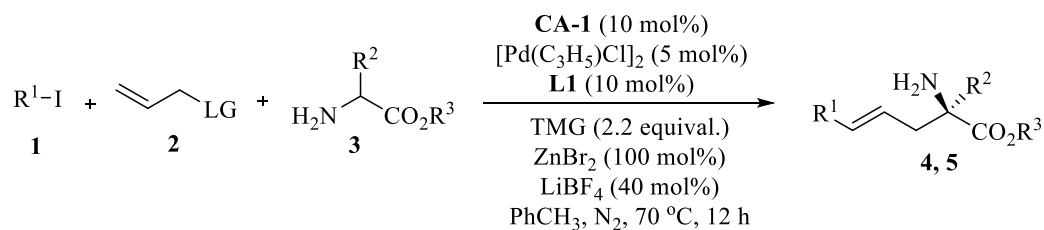

To a 10 mL vial charged with [Pd(C<sub>3</sub>H<sub>5</sub>)Cl]<sub>2</sub> (3.6 mg, 0.01 mmol) and **L1** (11.7 mg, 0.02 mmol) was added 0.5 mL toluene, and the mixture was stirred under nitrogen atmosphere at room temperature for 30 min. Then, aryl iodide **1** (0.2 mmol), allyl alcohol ester **2** (0.36 mmol), amino acid ester **3** (0.3 mmol), chiral aldehyde **CA-1** (7.7 mg, 0.02 mmol), ZnBr<sub>2</sub> (45.0 mg, 0.2 mmol), LiBF<sub>4</sub> (7.5mg, 0.08 mmol) and TMG (56.2 uL, 0.44 mmol) were added. The mixture was continuously stirred at indicated reaction temperature under nitrogen atmosphere. After the reaction completed, the solvent was removed by rotary evaporation, and the residue was purified by flash chromatography column on silica gel (eluent: petroleum ether/ ethyl acetate/ triethylamine =200/100/3).

***tert*-Butyl (*R, E*)-2-amino-2-methyl-5-phenylpent-4-enoate (**4b**):**

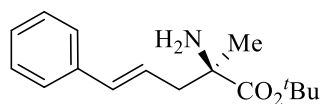

Colorless oil (42.1 mg, 81%);  $R_f = 0.23$  (petroleum ether/ ethyl acetate = 2:1); the enantiomeric excess was determined to be 97% by HPLC analysis on Daicel Chirapak IA-H column (hexane/isopropanol = 90/10, flow rate 1.0 mL/min,  $T = 30\text{ }^\circ\text{C}$ ), UV 254 nm,  $t_R(\text{major})$  5.442 min,  $t_R(\text{minor})$  4.955 min;  $[\alpha]_D^{20} = +16.25$  ( $c = 0.88$ ,  $\text{CHCl}_3$ );  $^1\text{H NMR}$  (600 MHz,  $\text{CDCl}_3$ )  $\delta$  7.36-7.29 (m, 4H), 7.23 (t,  $J = 6.0$  Hz, 1H), 6.50 (d,  $J = 18.0$  Hz, 1H), 6.25 – 5.93 (m, 1H), 2.67 (dd,  $J = 18.0, 6.0$  Hz, 1H), 2.42 (dd,  $J = 12.0, 6.0$  Hz, 1H), 1.79 (s, 2H), 1.50 (s, 9H), 1.36 (s, 3H);  $^{13}\text{C NMR}$  (151 MHz,  $\text{CDCl}_3$ )  $\delta$  176.39, 137.19, 134.02, 128.53, 127.34, 126.17, 124.71, 81.02, 58.11, 44.50, 28.04, 26.44; **HRMS(ESI)**  $m/z$ :  $[\text{M}+\text{H}]^+$  Calculated for  $\text{C}_{16}\text{H}_{24}\text{NO}_2^+$  262.1802; found 262.1809.

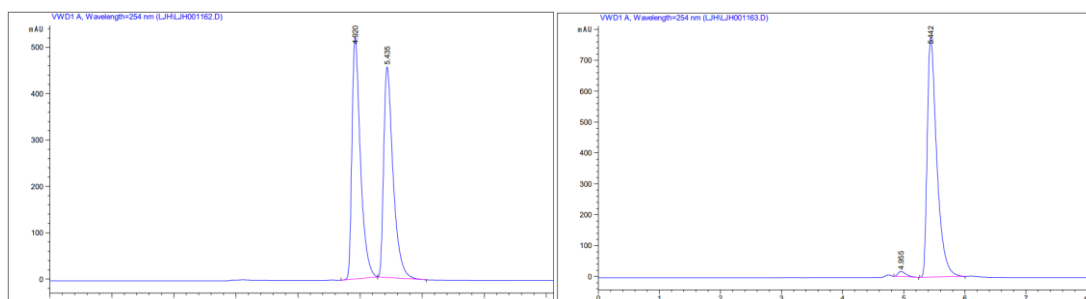

| Peak # | RetTime [min] | Type | Width [min] | Area [mAU*s] | Height [mAU] | Area %  | Peak # | RetTime [min] | Type | Width [min] | Area [mAU*s] | Height [mAU] | Area %  |
|--------|---------------|------|-------------|--------------|--------------|---------|--------|---------------|------|-------------|--------------|--------------|---------|
| 1      | 4.920         | BB   | 0.1423      | 4924.66504   | 521.26971    | 50.7793 | 1      | 4.955         | BB   | 0.1348      | 148.11320    | 16.57980     | 1.7261  |
| 2      | 5.435         | BB   | 0.1576      | 4773.50195   | 454.06982    | 49.2207 | 2      | 5.442         | BB   | 0.1634      | 8432.45605   | 774.70374    | 98.2739 |

***tert*-Butyl (*R,E*)-2-amino-2-methyl-5-(*o*-tolyl)pent-4-enoate (**4c**):**

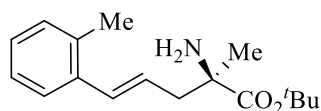

Colorless oil (17.1 mg, 31%);  $R_f = 0.25$  (petroleum ether/ ethyl acetate = 2:1); the enantiomeric excess was determined to be 92% by HPLC analysis on Daicel Chirapak OD-H column (hexane/isopropanol = 90/10, flow rate 1.0 mL/min,  $T = 30\text{ }^\circ\text{C}$ ), UV 254 nm,  $t_R(\text{major})$  10.015 min,  $t_R(\text{minor})$  5.679 min;  $[\alpha]_D^{20} = +10.60$  ( $c = 0.31$ ,  $\text{CHCl}_3$ );  $^1\text{H NMR}$  (600 MHz,  $\text{CDCl}_3$ )  $\delta$  7.39 – 7.37 (m, 1H), 7.13 (d,  $J = 6.0$  Hz, 3H), 6.68 (d,  $J = 18.0$  Hz, 1H), 6.03 – 5.98 (m, 1H), 2.67 (dd,  $J = 12.0, 6.0$  Hz, 1H), 2.42 (dd,  $J = 12.0, 6.0$  Hz, 1H), 2.33 (s, 3H), 1.73 (s, 2H), 1.47 (s, 9H), 1.35 (s, 3H);  $^{13}\text{C NMR}$  (151 MHz,  $\text{CDCl}_3$ )  $\delta$  176.44, 136.39, 135.11, 131.95, 130.23, 127.27, 126.13, 126.06, 125.69, 80.98, 57.97, 44.76, 28.05, 26.47, 19.84.; **HRMS(ESI)**  $m/z$ :  $[\text{M}+\text{H}]^+$  Calculated for  $\text{C}_{17}\text{H}_{26}\text{NO}_2^+$  276.1958; found 276.1957.

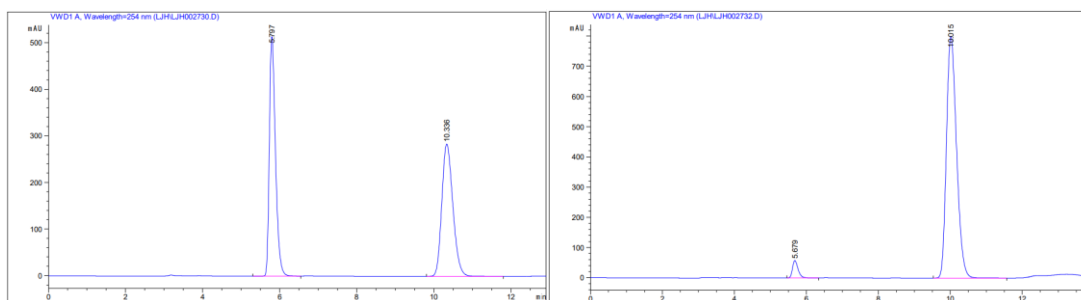

| Peak # | RetTime [min] | Type | Width [min] | Area [mAU*s] | Height [mAU] | Area %  | Peak # | RetTime [min] | Type | Width [min] | Area [mAU*s] | Height [mAU] | Area %  |
|--------|---------------|------|-------------|--------------|--------------|---------|--------|---------------|------|-------------|--------------|--------------|---------|
| 1      | 5.797         | BB   | 0.1684      | 5683.67236   | 513.80054    | 50.1393 | 1      | 5.679         | BB   | 0.1644      | 617.34601    | 57.59732     | 3.8128  |
| 2      | 10.336        | BB   | 0.3095      | 5652.08594   | 283.93750    | 49.8607 | 2      | 10.015        | BB   | 0.3030      | 1.55739e4    | 799.80554    | 96.1872 |

***tert*-Butyl (*R,E*)-2-amino-5-(2-fluorophenyl)-2-methylpent-4-enoate (4d):**

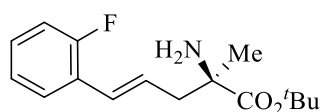

Colorless oil (32.2 mg, 58%);  $R_f = 0.24$  (petroleum ether/ ethyl acetate = 2:1); the enantiomeric excess was determined to be 78% by HPLC analysis on Daicel Chirapak OD-H column (hexane/isopropanol = 90/10, flow rate 0.8 mL/min,  $T = 30\text{ }^\circ\text{C}$ ), UV 254 nm,  $t_R(\text{major})$  8.814 min,  $t_R(\text{minor})$  6.536 min;  $[\alpha]_D^{20} = +4.39$  ( $c = 0.30$ ,  $\text{CHCl}_3$ );  $^1\text{H NMR}$  (600 MHz,  $\text{CDCl}_3$ )  $\delta$  7.34 - 7.31 (m, 1H), 7.12 - 7.09 (m, 1H), 7.00 (t,  $J = 7.3$  Hz, 1H), 6.94 (dd,  $J = 12.0, 6.0$  Hz, 1H), 6.55 (d,  $J = 12.0$  Hz, 1H), 6.19 - 6.14 (m, 1H), 2.59 (dd,  $J = 12.0, 6.0$  Hz, 1H), 2.35 (dd,  $J = 12.0, 6.0$  Hz, 1H), 1.67 (s, 2H), 1.40 (s, 9H), 1.28 (s, 3H);  $^{13}\text{C NMR}$  (151 MHz,  $\text{CDCl}_3$ )  $\delta$  176.29, 160.90(d,  $J = 249.2$  Hz), 128.56(d,  $J = 9.1$  Hz), 127.63(d,  $J = 4.5$  Hz), 127.35(d,  $J = 3.0$  Hz), 126.40(d,  $J = 3.0$  Hz), 124.98(d,  $J = 13.6$  Hz), 124.05(d,  $J = 3.0$  Hz), 115.75(d,  $J = 22.7$  Hz), 81.11, 58.12, 44.92, 28.00, 26.41; **HRMS(ESI)**  $m/z$ :  $[\text{M}+\text{H}]^+$  Calculated for  $\text{C}_{16}\text{H}_{23}\text{FNO}_2^+$  280.1707; found 280.1704.

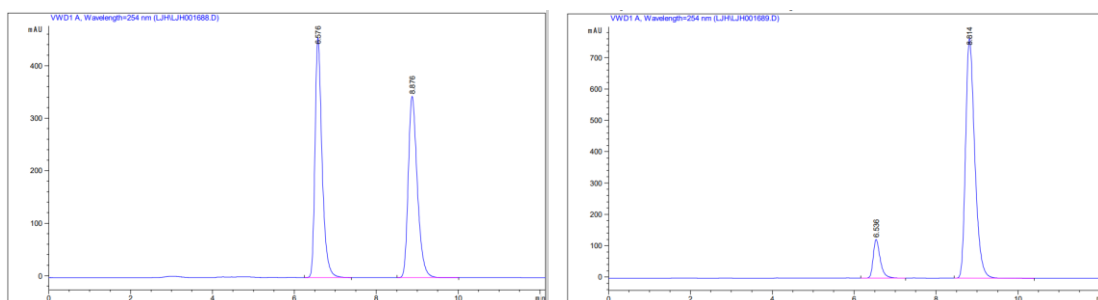

| Peak # | RetTime [min] | Type | Width [min] | Area [mAU*s] | Height [mAU] | Area %  | Peak # | RetTime [min] | Type | Width [min] | Area [mAU*s] | Height [mAU] | Area %  |
|--------|---------------|------|-------------|--------------|--------------|---------|--------|---------------|------|-------------|--------------|--------------|---------|
| 1      | 6.576         | BB   | 0.1783      | 5435.41895   | 456.53137    | 50.5943 | 1      | 6.536         | BB   | 0.1780      | 1466.90161   | 123.42873    | 10.9758 |
| 2      | 8.876         | BB   | 0.2348      | 5307.73145   | 345.09726    | 49.4057 | 2      | 8.814         | BB   | 0.2385      | 1.18979e4    | 764.05560    | 89.0242 |

***tert*-Butyl (*R,E*)-2-amino-2-methyl-5-(*m*-tolyl)pent-4-enoate (**4e**):**

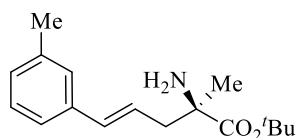

Colorless oil (32.5 mg, 59%);  $R_f = 0.22$  (petroleum ether/ ethyl acetate = 2:1); the enantiomeric excess was determined to be 96% by HPLC analysis on Daicel Chirapak OD-H column (hexane/isopropanol = 90/10, flow rate 1.0 mL/min,  $T = 30\text{ }^\circ\text{C}$ ), UV 254 nm,  $t_R(\text{major})$  12.751 min,  $t_R(\text{minor})$  6.546 min;  $[\alpha]_D^{20} = +8.19$  ( $c = 0.45$ ,  $\text{CHCl}_3$ );  $^1\text{H NMR}$  (600 MHz,  $\text{CDCl}_3$ )  $\delta$  7.29 - 7.15 (m, 3H), 7.06 (d,  $J = 6.0$  Hz, 1H), 6.47 (d,  $J = 18.0$  Hz, 1H), 6.21 - 6.04 (m, 1H), 2.66 (dd,  $J = 12.0, 6.0$  Hz, 1H), 2.41 (dd,  $J = 12.0, 6.0$  Hz, 1H), 2.35 (s, 3H), 1.83 (s, 2H), 1.50 (s, 9H), 1.36 (s, 3H);  $^{13}\text{C NMR}$  (151 MHz,  $\text{CDCl}_3$ )  $\delta$  176.37, 138.07, 137.13, 134.13, 128.43, 128.14, 126.92, 124.42, 123.32, 81.03, 58.13, 44.46, 28.04, 26.39, 21.39; **HRMS(ESI)**  $m/z$ :  $[\text{M}+\text{H}]^+$  Calculated for  $\text{C}_{17}\text{H}_{26}\text{NO}_2^+$  276.1958; found 276.1957.

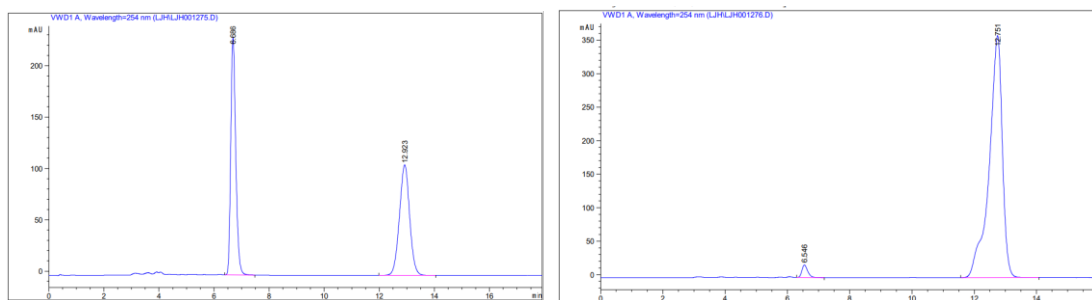

| Peak # | RetTime [min] | Type | Width [min] | Area [mAU*s] | Height [mAU] | Area %  | Peak # | RetTime [min] | Type | Width [min] | Area [mAU*s] | Height [mAU] | Area %  |
|--------|---------------|------|-------------|--------------|--------------|---------|--------|---------------|------|-------------|--------------|--------------|---------|
| 1      | 6.686         | BB   | 0.1920      | 2903.70483   | 230.79671    | 51.2025 | 1      | 6.546         | BB   | 0.1954      | 237.74306    | 18.65047     | 2.1837  |
| 2      | 12.923        | BB   | 0.3936      | 2767.31738   | 107.50187    | 48.7975 | 2      | 12.751        | BB   | 0.4301      | 1.06493e4    | 361.06296    | 97.8163 |

***tert*-Butyl (*R,E*)-2-amino-5-(3-fluorophenyl)-2-methylpent-4-enoate (**4f**):**

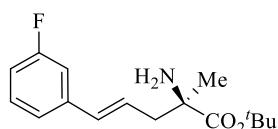

Colorless oil (35.2 mg, 63%);  $R_f = 0.24$  (petroleum ether/ ethyl acetate = 2:1); the enantiomeric excess was determined to be 93% by HPLC analysis on Daicel Chirapak OD-H column (hexane/isopropanol = 90/10, flow rate 0.8 mL/min,  $T = 30\text{ }^\circ\text{C}$ ), UV 254 nm,  $t_R(\text{major})$  7.976 min,  $t_R(\text{minor})$  6.210 min;  $[\alpha]_D^{20} = +15.03$  ( $c = 0.33$ ,  $\text{CHCl}_3$ );  $^1\text{H NMR}$  (600 MHz,  $\text{CDCl}_3$ )  $\delta$  7.29 - 7.25 (m, 1H), 7.11 (d,  $J = 7.7$  Hz, 1H), 7.04 (d,  $J = 10.2$  Hz, 1H), 6.94 - 6.91 (m, 1H), 6.46 (d,  $J = 12.0$  Hz, 1H), 6.25 - 6.01 (m, 1H), 2.66 (dd,  $J = 12.0, 6.0$  Hz, 1H), 2.42 (dd,  $J = 13.5, 8.3$  Hz, 1H), 1.77 (s, 2H), 1.49 (s, 9H), 1.36 (s, 3H);  $^{13}\text{C NMR}$  (151 MHz,  $\text{CDCl}_3$ )  $\delta$  176.25, 163.92 (d,  $J = 246.1$  Hz), 139.57 (d,  $J = 7.6$  Hz), 132.87 (d,  $J = 3.0$  Hz), 129.98 (d,  $J = 9.1$  Hz), 126.32, 122.04 (d,  $J = 3.0$  Hz), 114.18 (d,  $J = 6.1$  Hz), 112.67 (d,  $J = 7.6$  Hz), 81.11, 58.08, 44.38, 28.03, 26.39; **HRMS(ESI)**  $m/z$ :  $[\text{M}+\text{H}]^+$  Calculated for  $\text{C}_{16}\text{H}_{23}\text{FNO}_2^+$  280.1707; found 280.1704.

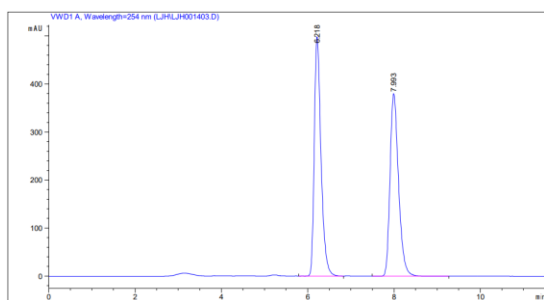

| Peak # | RetTime [min] | Type | Width [min] | Area [mAU*s] | Height [mAU] | Area %  |
|--------|---------------|------|-------------|--------------|--------------|---------|
| 1      | 6.218         | BB   | 0.1640      | 5383.00439   | 498.12210    | 50.8078 |
| 2      | 7.993         | BB   | 0.2096      | 5211.83936   | 379.90634    | 49.1922 |

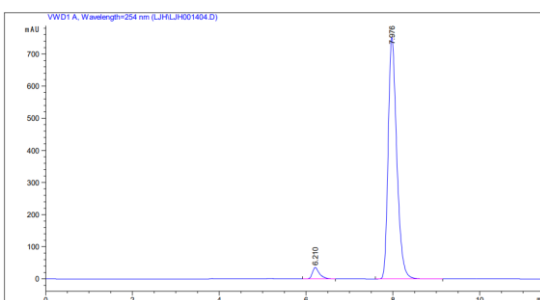

| Peak # | RetTime [min] | Type | Width [min] | Area [mAU*s] | Height [mAU] | Area %  |
|--------|---------------|------|-------------|--------------|--------------|---------|
| 1      | 6.210         | BB   | 0.1665      | 399.48621    | 35.44699     | 3.7255  |
| 2      | 7.976         | BB   | 0.2099      | 1.03235e4    | 751.34546    | 96.2745 |

***tert*-Butyl (*R,E*)-2-amino-5-(3-chlorophenyl)-2-methylpent-4-enoate (4g):**

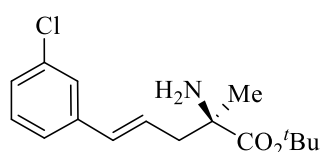

Colorless oil (35.9 mg, 61%);  $R_f = 0.22$  (petroleum ether/ ethyl acetate = 2:1); the enantiomeric excess was determined to be 91% by HPLC analysis on Daicel Chirapak OD-H column (hexane/isopropanol = 90/10, flow rate 1.0 mL/min,  $T = 30\text{ }^\circ\text{C}$ ), UV 254 nm,  $t_R$ (major) 6.529 min,  $t_R$ (minor) 5.263 min;  $[\alpha]_D^{20} = +13.45$  ( $c = 0.40$ ,  $\text{CHCl}_3$ );  $^1\text{H NMR}$  (600 MHz,  $\text{CDCl}_3$ )  $\delta$  7.33-7.21 (m, 4H), 6.44 (d,  $J = 18.0$  Hz, 1H), 6.20 (dd,  $J = 12.0, 6.0$  Hz, 1H), 2.66 (dd,  $J = 12.0, 6.0$  Hz, 1H), 2.43 (dd,  $J = 18.0, 12.0$  Hz, 1H), 1.80 (s, 2H), 1.50 (s, 9H), 1.32 (s, 3H);  $^{13}\text{C NMR}$  (151 MHz,  $\text{CDCl}_3$ )  $\delta$  176.24, 139.06, 134.49, 132.61, 129.74, 127.27, 126.49, 126.12, 124.35, 81.12, 58.09, 44.40, 28.04, 26.37; **HRMS(ESI)**  $m/z$ :  $[\text{M}+\text{H}]^+$  Calculated for  $\text{C}_{16}\text{H}_{23}\text{ClNO}_2^+$  296.1412; found 296.1418.

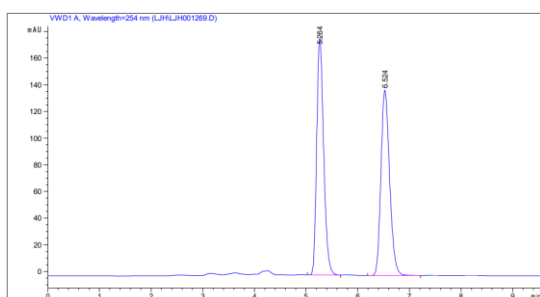

| Peak # | RetTime [min] | Type | Width [min] | Area [mAU*s] | Height [mAU] | Area %  |
|--------|---------------|------|-------------|--------------|--------------|---------|
| 1      | 5.264         | BB   | 0.1441      | 1662.89587   | 177.80638    | 50.6297 |
| 2      | 6.524         | BB   | 0.1799      | 1621.53223   | 138.95844    | 49.3703 |

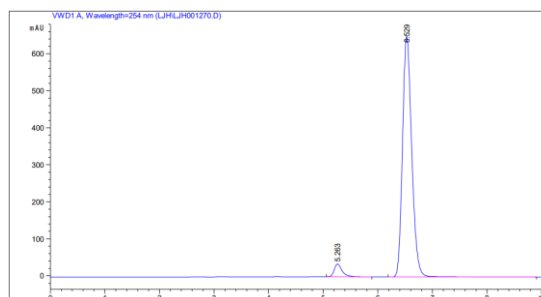

| Peak # | RetTime [min] | Type | Width [min] | Area [mAU*s] | Height [mAU] | Area %  |
|--------|---------------|------|-------------|--------------|--------------|---------|
| 1      | 5.263         | BB   | 0.1494      | 340.63361    | 34.29154     | 4.2525  |
| 2      | 6.529         | BB   | 0.1812      | 7669.51416   | 650.66986    | 95.7475 |

***tert*-Butyl (*R,E*)-2-amino-5-(3-bromophenyl)-2-methylpent-4-enoate (4h):**

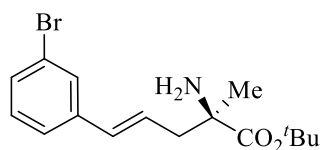

Colorless oil (40.6 mg, 60%);  $R_f = 0.23$  (petroleum ether/ ethyl acetate = 2:1); the enantiomeric excess was determined to be 94% by HPLC analysis on Daicel Chirapak OD-H column (hexane/isopropanol = 90/10, flow rate 0.8 mL/min,  $T = 30\text{ }^\circ\text{C}$ ), UV 254 nm,  $t_R$ (major) 8.573 min,

$t_R$ (minor) 6.999 min;  $[\alpha]_D^{20} = +7.94$  ( $c = 0.77$ ,  $\text{CHCl}_3$ );  $^1\text{H NMR}$  (600 MHz,  $\text{CDCl}_3$ )  $\delta$  7.47 (s, 1H), 7.33 (d,  $J = 12.0$  Hz, 1H), 7.24 (d,  $J = 6.0$  Hz, 1H), 7.15 (t,  $J = 12.0$  Hz, 1H), 6.40 (d,  $J = 12.0$  Hz, 1H), 6.19 – 6.13 (m, 1H), 2.63 (dd,  $J = 12.6, 6.9$  Hz, 1H), 2.40 (dd,  $J = 13.0, 8.3$  Hz, 1H), 1.71 (s, 2H), 1.47 (s, 9H), 1.34 (s, 3H);  $^{13}\text{C NMR}$  (151 MHz,  $\text{CDCl}_3$ )  $\delta$  176.25, 139.37, 132.47, 130.18, 130.03, 129.06, 126.59, 124.78, 122.74, 81.09, 58.08, 44.41, 28.04, 26.38; **HRMS(ESI)**  $m/z$ :  $[\text{M}+\text{H}]^+$  Calculated for  $\text{C}_{16}\text{H}_{23}\text{BrNO}_2^+$  340.0907; found 340.0904.

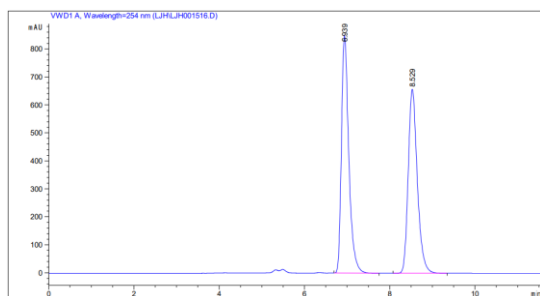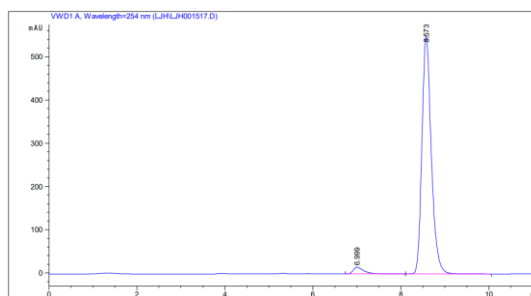

| Peak # | RetTime [min] | Type | Width [min] | Area [mAU*s] | Height [mAU] | Area %  |
|--------|---------------|------|-------------|--------------|--------------|---------|
| 1      | 6.939         | BB   | 0.1817      | 1.01396e4    | 848.68433    | 51.0080 |
| 2      | 8.529         | BB   | 0.2252      | 9738.87402   | 657.90216    | 48.9920 |

| Peak # | RetTime [min] | Type | Width [min] | Area [mAU*s] | Height [mAU] | Area %  |
|--------|---------------|------|-------------|--------------|--------------|---------|
| 1      | 6.999         | BB   | 0.2524      | 257.91895    | 15.50596     | 3.0704  |
| 2      | 8.573         | BB   | 0.2252      | 8142.35254   | 549.85730    | 96.9296 |

**tert-Butyl (R,E)-2-amino-2-methyl-5-(p-tolyl)pent-4-enoate (4i):**

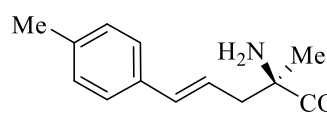

Colorless oil (39.9 mg, 73%);  $R_f = 0.23$  (petroleum ether/ ethyl acetate = 2:1); the enantiomeric excess was determined to be 91% by HPLC analysis on Daicel Chirapak OD-H column (hexane/isopropanol = 90/10, flow rate 1.0 mL/min,  $T = 30$  °C), UV 254 nm,  $t_R$ (major) 13.672 min,  $t_R$ (minor) 6.979 min;  $[\alpha]_D^{20} = +12.88$  ( $c = 0.50$ ,  $\text{CHCl}_3$ );  $^1\text{H NMR}$  (600 MHz,  $\text{CDCl}_3$ )  $\delta$  7.25 (d,  $J = 6.0$  Hz, 2H), 7.12 (d,  $J = 6.0$  Hz, 2H), 6.47 (d,  $J = 12.0$  Hz, 1H), 6.10 (ddd,  $J = 15.4, 8.1, 7.0$  Hz, 1H), 2.66 (ddd,  $J = 13.5, 6.8, 1.0$  Hz, 1H), 2.44 – 2.36 (m, 1H), 2.35 (s, 3H), 1.81 (s, 2H), 1.49 (s, 9H), 1.36 (s, 3H);  $^{13}\text{C NMR}$  (151 MHz,  $\text{CDCl}_3$ )  $\delta$  176.42, 137.11, 134.42, 133.90, 129.22, 126.07, 123.58, 80.97, 58.12, 44.52, 28.04, 26.42, 21.15; **HRMS(ESI)**  $m/z$ :  $[\text{M}+\text{H}]^+$  Calculated for  $\text{C}_{17}\text{H}_{26}\text{NO}_2^+$  276.1958; found 276.1963.

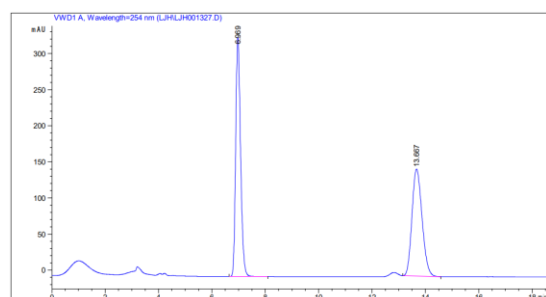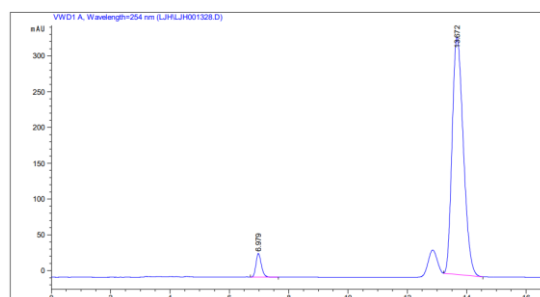

| Peak # | RetTime [min] | Type | Width [min] | Area [mAU*s] | Height [mAU] | Area %  | Peak # | RetTime [min] | Type | Width [min] | Area [mAU*s] | Height [mAU] | Area %  |
|--------|---------------|------|-------------|--------------|--------------|---------|--------|---------------|------|-------------|--------------|--------------|---------|
| 1      | 6.969         | BB   | 0.1952      | 4209.73779   | 330.71246    | 51.9669 | 1      | 6.979         | BB   | 0.1943      | 416.54797    | 32.90405     | 4.5690  |
| 2      | 13.667        | BB   | 0.4112      | 3891.07324   | 148.24908    | 48.0331 | 2      | 13.672        | BB   | 0.4112      | 8700.37598   | 331.46686    | 95.4310 |

***tert*-Butyl (*R,E*)-2-amino-5-(4-ethylphenyl)-2-methylpent-4-enoate (**4j**):**

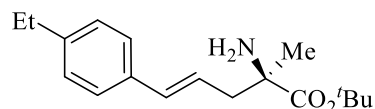

Colorless oil (42.1 mg, 73%);  $R_f = 0.25$  (petroleum ether/ ethyl acetate = 2:1); the enantiomeric excess was determined to be 94%

by HPLC analysis on Daicel Chirapak IA-H column (hexane/isopropanol = 90/10, flow rate 1.0 mL/min,  $T = 30\text{ }^\circ\text{C}$ ), UV 254 nm,  $t_R$ (major) 5.889 min,  $t_R$ (minor) 5.022 min;  $[\alpha]_D^{20} = +15.06$  ( $c = 0.43$ ,  $\text{CHCl}_3$ );  $^1\text{H NMR}$  (600 MHz,  $\text{CDCl}_3$ )  $\delta$  7.28 (d,  $J = 6.0$  Hz, 2H), 7.16(d,  $J = 6.0$  Hz, 2H), 6.48 (d,  $J = 12.0$  Hz, 1H), 6.13 – 6.08 (m, 1H), 2.68 – 2.63 (m, 3H), 2.40 (dd,  $J = 12.0, 6.0$  Hz, 1H), 1.80 (s, 2H), 1.50 (s, 9H), 1.36 (s, 3H), 1.25(t,  $J = 6.0$  Hz, 3H);  $^{13}\text{C NMR}$  (151 MHz,  $\text{CDCl}_3$ )  $\delta$  176.42, 143.56, 134.68, 133.93, 128.04, 126.16, 123.66, 80.98, 58.11, 44.49, 28.58, 28.05, 26.43, 15.55; **HRMS(ESI)**  $m/z$ :  $[\text{M}+\text{H}]^+$  Calculated for  $\text{C}_{18}\text{H}_{28}\text{NO}_2^+$  290.2115; found 290.2114.

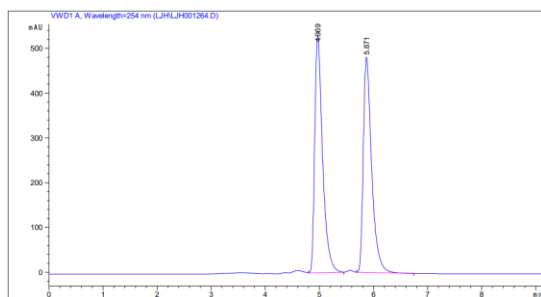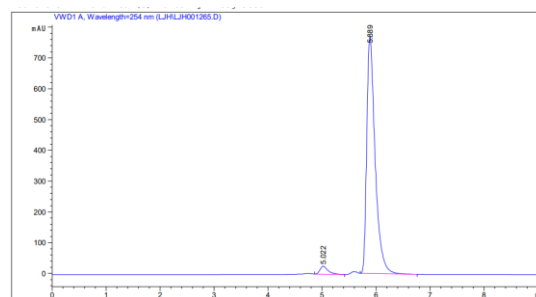

| Peak # | RetTime [min] | Type | Width [min] | Area [mAU*s] | Height [mAU] | Area %  | Peak # | RetTime [min] | Type | Width [min] | Area [mAU*s] | Height [mAU] | Area %  |
|--------|---------------|------|-------------|--------------|--------------|---------|--------|---------------|------|-------------|--------------|--------------|---------|
| 1      | 4.969         | BB   | 0.1525      | 5331.92139   | 529.26935    | 50.7627 | 1      | 5.022         | BB   | 0.1515      | 258.91901    | 25.61263     | 3.0340  |
| 2      | 5.871         | BB   | 0.1619      | 5171.69287   | 480.75259    | 49.2373 | 2      | 5.889         | BB   | 0.1620      | 8275.11230   | 768.71417    | 96.9660 |

***tert*-Butyl (*R,E*)-5-([1,1'-biphenyl]-4-yl)-2-amino-2-methylpent-4-enoate (**4k**):**

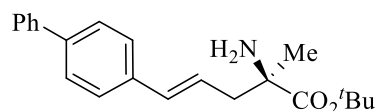

White solid (45.1 mg, 67%); m.p. = 75-76  $^\circ\text{C}$ ;  $R_f = 0.26$  (petroleum ether/ ethyl acetate = 2:1); the enantiomeric excess

was determined to be 96% by HPLC analysis on Daicel Chirapak OD-H column (hexane/isopropanol = 90/10, flow rate 0.8 mL/min,  $T = 30\text{ }^\circ\text{C}$ ), UV 254 nm,  $t_R$ (major) 12.469 min,  $t_R$ (minor) 16.504 min;  $[\alpha]_D^{20} = +11.21$  ( $c = 0.55$ ,  $\text{CHCl}_3$ );  $^1\text{H NMR}$  (600 MHz,  $\text{CDCl}_3$ )  $\delta$  7.62 (d,  $J = 12.0$  Hz, 2H), 7.57 (d,  $J = 6.0$  Hz, 2H), 7.47 - 7.43 (m, 4H), 7.36 (t,  $J = 6.0$  Hz, 1H), 6.55 (d,  $J = 18.0$  Hz, 1H), 6.25 – 6.20 (m, 1H), 2.70 (dd,  $J = 12.0, 6.0$  Hz, 1H), 2.45 (dd,  $J = 12.0, 6.0$  Hz, 1H), 1.83 (s, 2H), 1.52 (s, 9H), 1.39 (s, 3H);  $^{13}\text{C NMR}$  (151 MHz,  $\text{CDCl}_3$ )  $\delta$  176.37, 140.75, 140.12, 136.24, 133.56, 128.78, 127.26, 127.25, 126.92, 126.60, 124.90, 81.05, 58.17, 44.58, 28.07, 26.44; **HRMS(ESI)**  $m/z$ :

[M+H]<sup>+</sup> Calculated for C<sub>22</sub>H<sub>28</sub>NO<sub>2</sub><sup>+</sup> 338.2115; found 338.2112.

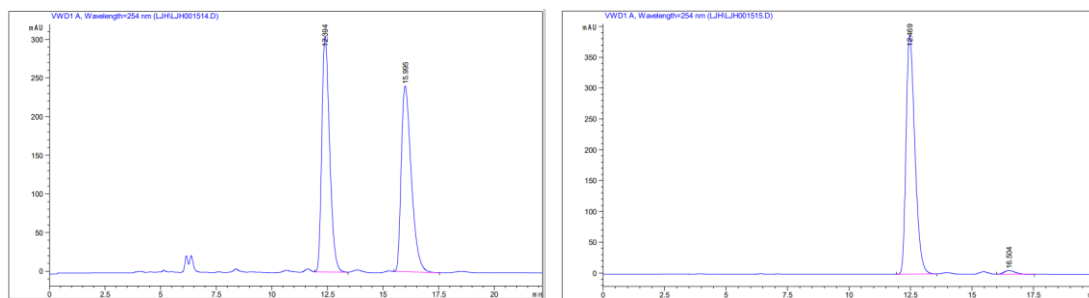

| Peak # | RetTime [min] | Type | Width [min] | Area [mAU*s] | Height [mAU] | Area %  |
|--------|---------------|------|-------------|--------------|--------------|---------|
| 1      | 12.394        | BB   | 0.3800      | 7461.24756   | 305.20517    | 49.7797 |
| 2      | 15.995        | BB   | 0.4806      | 7527.29541   | 240.29253    | 50.2203 |

  

| Peak # | RetTime [min] | Type | Width [min] | Area [mAU*s] | Height [mAU] | Area %  |
|--------|---------------|------|-------------|--------------|--------------|---------|
| 1      | 12.469        | BB   | 0.3858      | 9652.33203   | 386.87268    | 98.0457 |
| 2      | 16.504        | BB   | 0.5010      | 192.39676    | 5.97568      | 1.9543  |

**tert-Butyl (R,E)-2-amino-5-(4-(tert-butyl)phenyl)-2-methylpent-4-enoate (4l):**

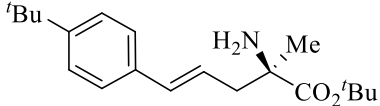 Colorless oil (44.6 mg, 70%); R<sub>f</sub> = 0.26 (petroleum ether/ ethyl acetate = 2:1); the enantiomeric excess was determined to be 96% by HPLC analysis on Daicel Chirapak OD-H column (hexane/isopropanol = 90/10, flow rate 0.8 mL/min, T = 30 °C), UV 254 nm, t<sub>R</sub>(major) 6.141 min, t<sub>R</sub>(minor) 5.268 min; [α]<sub>D</sub><sup>20</sup> = +5.56 (c = 0.40, CHCl<sub>3</sub>); <sup>1</sup>H NMR (600 MHz, CDCl<sub>3</sub>) δ 7.25 (d, J = 12.0 Hz, 2H), 7.20 (d, J = 12.0 Hz, 2H), 6.39 (d, J = 12.0 Hz, 1H), 6.02 (ddd, J = 15.5, 8.1, 7.0 Hz, 1H), 2.57 (dd, J = 18.0, 6.0 Hz, 1H), 2.31 (dd, J = 18.0, 6.0 Hz, 1H), 1.68 (s, 2H), 1.41 (s, 9H), 1.26 (s, 3H), 1.24 (s, 9H); <sup>13</sup>C NMR (151 MHz, CDCl<sub>3</sub>) δ 176.33, 150.42, 134.43, 133.82, 125.90, 125.44, 123.83, 80.99, 58.14, 44.45, 34.54, 31.30, 28.05, 26.40; HRMS(ESI) m/z: [M+H]<sup>+</sup> Calculated for C<sub>20</sub>H<sub>32</sub>NO<sub>2</sub><sup>+</sup> 318.2428; found 318.2427.

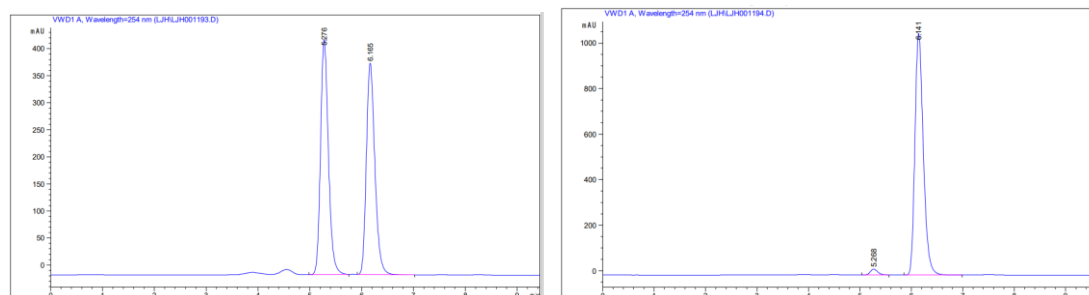

| Peak # | RetTime [min] | Type | Width [min] | Area [mAU*s] | Height [mAU] | Area %  |
|--------|---------------|------|-------------|--------------|--------------|---------|
| 1      | 5.276         | BB   | 0.1620      | 4570.98145   | 434.95544    | 50.6744 |
| 2      | 6.165         | BB   | 0.1766      | 4449.31543   | 390.78174    | 49.3256 |

  

| Peak # | RetTime [min] | Type | Width [min] | Area [mAU*s] | Height [mAU] | Area %  |
|--------|---------------|------|-------------|--------------|--------------|---------|
| 1      | 5.268         | BB   | 0.1525      | 254.04808    | 25.53616     | 2.0678  |
| 2      | 6.141         | BB   | 0.1747      | 1.20320e4    | 1060.27576   | 97.9322 |

**tert-Butyl (R,E)-2-amino-5-(4-methoxyphenyl)-2-methylpent-4-enoate (4m):**

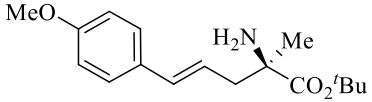 Colorless oil (41.2 mg, 72%); R<sub>f</sub> = 0.21 (petroleum ether/ ethyl acetate = 2:1); the enantiomeric excess was determined to be 95% by HPLC analysis on Daicel Chirapak IA-H column (hexane/isopropanol = 90/10, flow rate 1.0



mL/min, T = 30 °C), UV 254 nm,  $t_R$ (major) 7.579 min,  $t_R$ (minor) 6.443 min;  $[\alpha]_D^{20} = +17.54$  ( $c = 0.80$ ,  $\text{CHCl}_3$ );  $^1\text{H NMR}$  (600 MHz,  $\text{CDCl}_3$ )  $\delta$  7.19 (d,  $J = 6.0$  Hz, 2H), 6.76 (d,  $J = 6.0$  Hz, 2H), 6.34 (d,  $J = 18.0$  Hz, 1H), 5.93-5.88 (m, 1H), 3.72 (s, 3H), 2.55 (dd,  $J = 18.0, 6.0$  Hz, 1H), 2.28 (dd,  $J = 12.0, 6.0$  Hz, 1H), 1.70 (s, 2H), 1.40 (s, 9H), 1.26 (s, 3H);  $^{13}\text{C NMR}$  (151 MHz,  $\text{CDCl}_3$ )  $\delta$  176.46, 159.03, 133.41, 130.04, 127.29, 122.38, 113.95, 80.92, 58.12, 55.28, 44.53, 28.04, 26.43; **HRMS(ESI)**  $m/z$ :  $[\text{M}+\text{H}]^+$  Calculated for  $\text{C}_{17}\text{H}_{26}\text{NO}_3^+$  292.1907; found 292.1912.

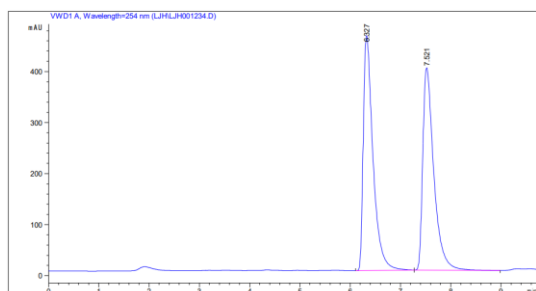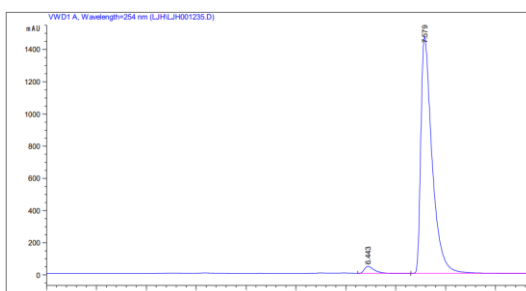

| Peak # | RetTime [min] | Type | Width [min] | Area [mAU*s] | Height [mAU] | Area %  |
|--------|---------------|------|-------------|--------------|--------------|---------|
| 1      | 6.327         | BB   | 0.2001      | 6167.70215   | 460.21545    | 50.5342 |
| 2      | 7.521         | BB   | 0.2286      | 6037.30371   | 396.53659    | 49.4658 |

| Peak # | RetTime [min] | Type | Width [min] | Area [mAU*s] | Height [mAU] | Area %  |
|--------|---------------|------|-------------|--------------|--------------|---------|
| 1      | 6.443         | BB   | 0.2084      | 612.11133    | 43.75831     | 2.5880  |
| 2      | 7.579         | BB   | 0.2340      | 2.30399e4    | 1469.36389   | 97.4120 |

**tert-Butyl (R,E)-2-amino-2-methyl-5-(4-phenoxyphenyl)pent-4-enoate (4n):**

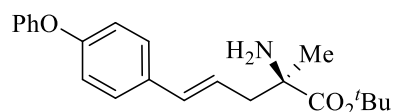

Colorless oil (53.1 mg, 75%);  $R_f = 0.24$  (petroleum ether/ ethyl acetate = 2:1); the enantiomeric excess was determined to be

94% by HPLC analysis on Daicel Chirapak OD-H column (hexane/isopropanol = 90/10, flow rate 1.0 mL/min, T = 30 °C), UV 254 nm,  $t_R$ (major) 9.474 min,  $t_R$ (minor) 7.557 min;  $[\alpha]_D^{20} = +17.36$  ( $c = 0.53$ ,  $\text{CHCl}_3$ );  $^1\text{H NMR}$  (600 MHz,  $\text{CDCl}_3$ )  $\delta$  7.36 - 7.29 (m, 4H), 7.12 (t,  $J = 6.0$  Hz, 1H), 7.03 (d,  $J = 6.0$  Hz, 2H), 6.96 (d,  $J = 12.0$  Hz, 2H), 6.48 (d,  $J = 18.0$  Hz, 1H), 6.10 - 6.05 (m, 1H), 2.66 (dd,  $J = 12.0, 6.0$  Hz, 1H), 2.41 (dd,  $J = 12.0, 6.0$  Hz, 1H), 1.80 (s, 2H), 1.50 (s, 9H), 1.36 (s, 3H);  $^{13}\text{C NMR}$  (151 MHz,  $\text{CDCl}_3$ )  $\delta$  176.42, 157.21, 156.59, 133.17, 132.50, 129.74, 127.48, 123.81, 123.27, 118.90, 80.99, 58.12, 44.50, 28.06, 26.43; **HRMS(ESI)**  $m/z$ :  $[\text{M}+\text{H}]^+$  Calculated for  $\text{C}_{22}\text{H}_{28}\text{NO}_3^+$  354.2064; found 354.2069.

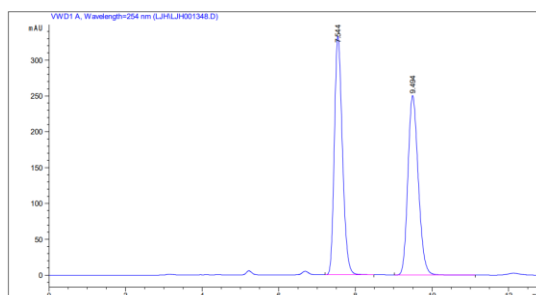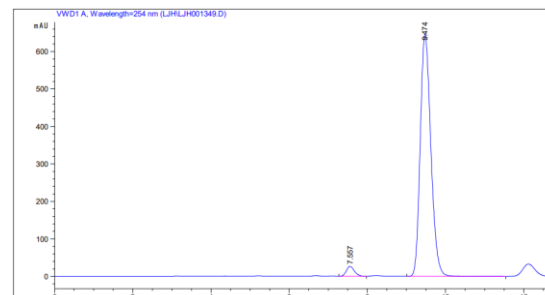

| Peak # | RetTime [min] | Type | Width [min] | Area [mAU*s] | Height [mAU] | Area %  | Peak # | RetTime [min] | Type | Width [min] | Area [mAU*s] | Height [mAU] | Area %  |
|--------|---------------|------|-------------|--------------|--------------|---------|--------|---------------|------|-------------|--------------|--------------|---------|
| 1      | 7.544         | BB   | 0.2258      | 4859.06738   | 332.68939    | 50.7741 | 1      | 7.557         | BB   | 0.2222      | 375.03467    | 26.23285     | 2.9848  |
| 2      | 9.494         | BB   | 0.2924      | 4710.90137   | 250.41580    | 49.2259 | 2      | 9.474         | BB   | 0.2915      | 1.21897e4    | 646.23926    | 97.0152 |

***tert*-Butyl (*R,E*)-2-amino-5-(4-fluorophenyl)-2-methylpent-4-enoate (**4o**):**

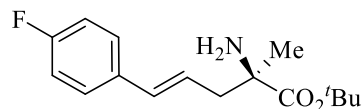

Colorless oil (36.3 mg, 65%);  $R_f = 0.22$  (petroleum ether/ ethyl acetate = 2:1); the enantiomeric excess was determined to be 95%

by HPLC analysis on Daicel Chirapak OD-H column (hexane/isopropanol = 90/10, flow rate 0.8 mL/min,  $T = 30\text{ }^\circ\text{C}$ ), UV 254 nm,  $t_R$ (major) 7.165 min,  $t_R$ (minor) 5.867 min;  $[\alpha]_D^{20} = +9.95$  ( $c = 0.41$ ,  $\text{CHCl}_3$ );  $^1\text{H NMR}$  (600 MHz,  $\text{CDCl}_3$ )  $\delta$  7.23 – 7.20 (m, 2H), 6.91 (t,  $J = 6.0$  Hz, 2H), 6.36 (d,  $J = 18.0$  Hz, 1H), 6.00 - 5.95 (m, 1H), 2.55 (dd,  $J = 12.0, 6.0$  Hz, 1H), 2.31 (dd,  $J = 12.0, 6.0$  Hz, 1H), 1.68 (s, 2H), 1.40 (s, 9H), 1.26 (s, 3H);  $^{13}\text{C NMR}$  (151 MHz,  $\text{CDCl}_3$ )  $\delta$  176.35, 162.98(d,  $J = 246.1$  Hz), 133.37(d,  $J = 3.0$  Hz), 132.77, 127.64(d,  $J = 9.1$  Hz), 124.48, 115.48(d,  $J = 22.7$  Hz), 81.04, 58.09, 44.43, 28.03, 26.40; **HRMS(ESI)**  $m/z$ :  $[\text{M}+\text{H}]^+$  Calculated for  $\text{C}_{16}\text{H}_{23}\text{FNO}_2^+$  280.1707; found 280.1704.

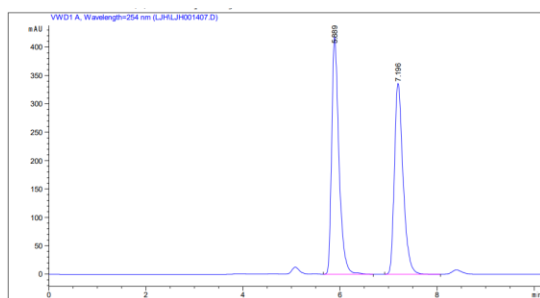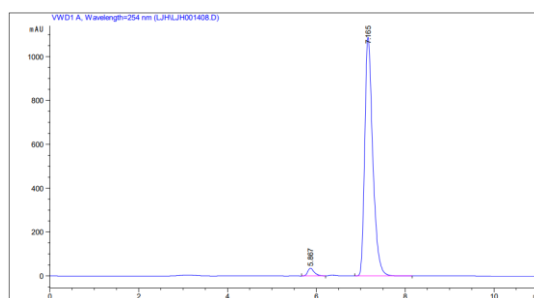

| Peak # | RetTime [min] | Type | Width [min] | Area [mAU*s] | Height [mAU] | Area %  |
|--------|---------------|------|-------------|--------------|--------------|---------|
| 1      | 5.889         | BB   | 0.1566      | 4354.50000   | 417.58478    | 51.0983 |
| 2      | 7.196         | BB   | 0.1884      | 4167.31201   | 336.10693    | 48.9017 |

| Peak # | RetTime [min] | Type | Width [min] | Area [mAU*s] | Height [mAU] | Area %  |
|--------|---------------|------|-------------|--------------|--------------|---------|
| 1      | 5.867         | BB   | 0.1529      | 351.32611    | 34.77355     | 2.5057  |
| 2      | 7.165         | BB   | 0.1904      | 1.36698e4    | 1087.31055   | 97.4943 |

***tert*-Butyl (*R,E*)-2-amino-5-(4-chlorophenyl)-2-methylpent-4-enoate (**4p**):**

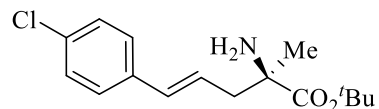

Colorless oil (39.1 mg, 66%);  $R_f = 0.22$  (petroleum ether/ ethyl acetate = 2:1); the enantiomeric excess was determined to be 96%

by HPLC analysis on Daicel Chirapak OD-H column (hexane/isopropanol = 90/10, flow rate 0.8 mL/min,  $T = 30\text{ }^\circ\text{C}$ ), UV 254 nm,  $t_R$ (major) 6.915 min,  $t_R$ (minor) 6.057 min;  $[\alpha]_D^{20} = +8.02$  ( $c = 0.58$ ,  $\text{CHCl}_3$ );  $^1\text{H NMR}$  (600 MHz,  $\text{CDCl}_3$ )  $\delta$  7.27 (s, 4H), 6.44 (d,  $J = 18.0$  Hz, 1H), 6.16 – 6.11 (m, 1H), 2.65 (dd,  $J = 12.0, 6.0$  Hz, 1H), 2.41 (dd,  $J = 12.0, 6.0$  Hz, 1H), 1.77 (s, 2H), 1.48 (s, 9H), 1.35 (s, 3H);  $^{13}\text{C NMR}$  (151 MHz,  $\text{CDCl}_3$ )  $\delta$  176.30, 135.67, 132.92, 132.72, 128.68, 127.35, 125.54, 81.08, 58.09, 44.46, 28.03, 26.40; **HRMS(ESI)**  $m/z$ :  $[\text{M}+\text{H}]^+$  Calculated for  $\text{C}_{16}\text{H}_{23}\text{ClNO}_2^+$  296.1412; found

296.1409.

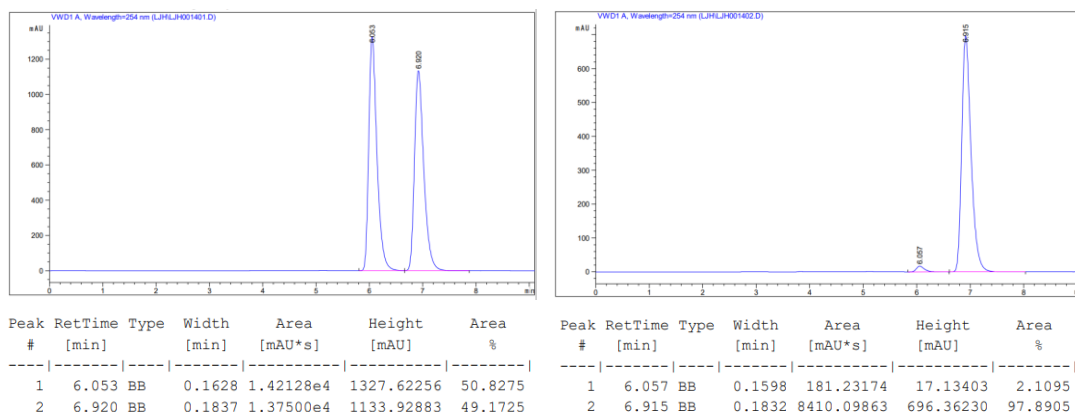

**tert-Butyl (R,E)-2-amino-5-(4-bromophenyl)-2-methylpent-4-enoate (4q):**

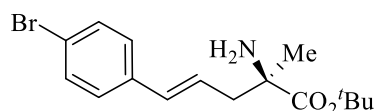

Colorless oil (43.7 mg, 64%);  $R_f = 0.25$  (petroleum ether/ ethyl acetate = 2:1); the enantiomeric excess was determined to be 95%

by HPLC analysis on Daicel Chirapak OD-H column (hexane/isopropanol = 90/10, flow rate 0.8 mL/min, T = 30 °C), UV 254 nm,  $t_R$ (major) 7.052 min,  $t_R$ (minor) 6.328 min;  $[\alpha]_D^{20} = +12.63$  (c = 0.50, CHCl<sub>3</sub>); <sup>1</sup>H NMR (600 MHz, CDCl<sub>3</sub>) δ 7.43 (d, J = 6.0 Hz, 2H), 7.21 (d, J = 6.0 Hz, 2H), 6.43 (d, J = 18.0 Hz, 1H), 6.18 – 6.13 (m, 1H), 2.64 (ddd, J = 13.6, 6.9, 1.2 Hz, 1H), 2.40 (ddd, J = 13.6, 8.2, 0.8 Hz, 1H), 1.79 (s, 2H), 1.48 (s, 9H), 1.35 (s, 3H); <sup>13</sup>C NMR (151 MHz, CDCl<sub>3</sub>) δ 176.26, 136.12, 132.76, 131.63, 127.68, 125.70, 121.04, 81.08, 58.07, 44.47, 28.03, 26.39; HRMS(ESI) m/z: [M+H]<sup>+</sup> Calculated for C<sub>16</sub>H<sub>23</sub>BrNO<sub>2</sub><sup>+</sup> 340.0907; found 340.0903.

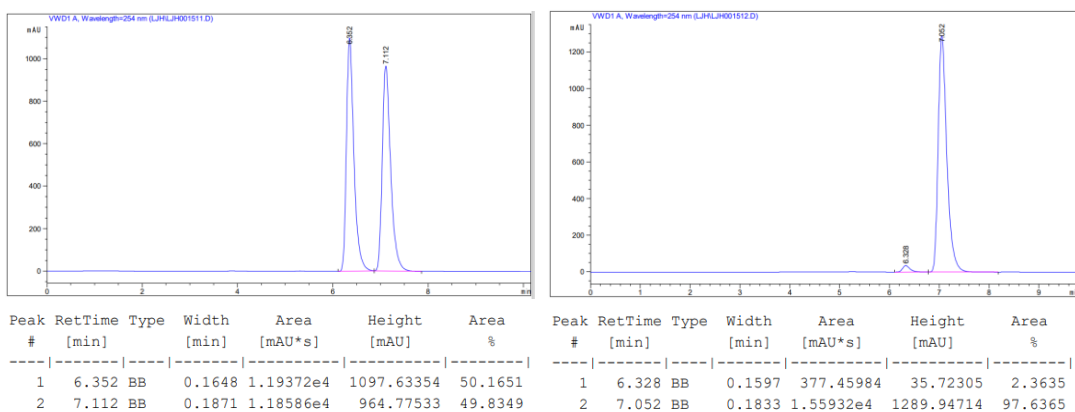

**tert-Butyl (R,E)-2-amino-2-methyl-5-(4'-propyl-[1,1'-biphenyl]-4-yl)pent-4-enoate (4r):**

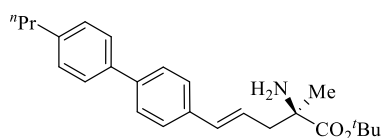

Colorless oil (54.5 mg, 72%);  $R_f = 0.25$  (petroleum ether/ ethyl acetate = 2:1); the enantiomeric excess was determined to be 96% by HPLC analysis on Daicel Chirapak IA-H column

(hexane/isopropanol = 90/10, flow rate 0.8 mL/min, T = 30 °C), UV 254 nm,  $t_R$ (major) 8.715 min,

$t_R$ (minor) 7.956 min;  $[\alpha]_D^{20} = +16.09$  ( $c = 0.86$ ,  $\text{CHCl}_3$ );  $^1\text{H NMR}$  (600 MHz,  $\text{CDCl}_3$ )  $\delta$  7.56 (d,  $J = 6.0$  Hz, 2H), 7.54 (d,  $J = 6.0$  Hz, 2H), 7.42 (d,  $J = 12.0$  Hz, 2H), 7.27 (d,  $J = 12.0$  Hz, 2H), 6.54 (d,  $J = 18.0$  Hz, 1H), 6.23 - 6.18 (m, 1H), 2.70 (dd,  $J = 12.0, 6.0$  Hz, 1H), 2.68 - 2.64 (m, 2H), 2.45 (dd,  $J = 18.0, 12.0$  Hz, 1H), 1.81 (s, 2H), 1.74 - 1.68 (m, 2H), 1.52 (s, 9H), 1.38 (s, 3H), 1.00 (t,  $J = 7.3$  Hz, 3H);  $^{13}\text{C NMR}$  (151 MHz,  $\text{CDCl}_3$ )  $\delta$  176.38, 141.89, 140.10, 138.09, 135.93, 133.64, 128.91, 127.05, 126.72, 126.56, 124.64, 81.04, 58.16, 44.58, 37.71, 28.07, 26.44, 24.55, 13.88; **HRMS(ESI)**  $m/z$ :  $[\text{M}+\text{H}]^+$  Calculated for  $\text{C}_{25}\text{H}_{34}\text{NO}_2^+$  380.2584; found 380.2585.

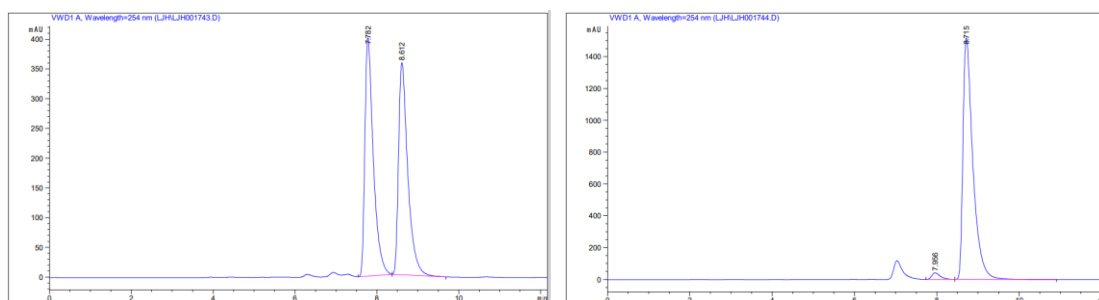

| Peak # | RetTime [min] | Type | Width [min] | Area [mAU*s] | Height [mAU] | Area %  |
|--------|---------------|------|-------------|--------------|--------------|---------|
| 1      | 7.782         | BB   | 0.2145      | 5772.36963   | 401.09854    | 50.8520 |
| 2      | 8.612         | BB   | 0.2334      | 5578.93408   | 356.87427    | 49.1480 |

  

| Peak # | RetTime [min] | Type | Width [min] | Area [mAU*s] | Height [mAU] | Area %  |
|--------|---------------|------|-------------|--------------|--------------|---------|
| 1      | 7.956         | BB   | 0.2097      | 576.91602    | 41.28906     | 2.2276  |
| 2      | 8.715         | BBA  | 0.2488      | 2.53211e4    | 1516.16333   | 97.7724 |

***tert*-Butyl (*R,E*)-2-amino-5-(4'-butyl-[1,1'-biphenyl]-4-yl)-2-methylpent-4-enoate (4s):**

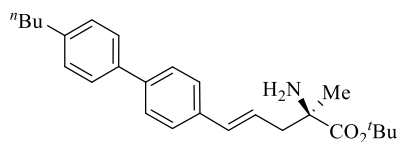

Colorless oil (54.2 mg, 69%);  $R_f = 0.27$  (petroleum ether/ethyl acetate = 2:1); the enantiomeric excess was determined to be 95% by HPLC analysis on Daicel Chirapak IA-H

column (hexane/isopropanol = 90/10, flow rate 0.8 mL/min,  $T = 30$  °C), UV 254 nm,  $t_R$ (major) 9.120 min,  $t_R$ (minor) 7.913 min;  $[\alpha]_D^{20} = +11.49$  ( $c = 0.73$ ,  $\text{CHCl}_3$ );  $^1\text{H NMR}$  (600 MHz,  $\text{CDCl}_3$ )  $\delta$  7.56 (d,  $J = 12.0$  Hz, 2H), 7.54 (d,  $J = 6.0$  Hz, 2H), 7.42 (d,  $J = 6.0$  Hz, 2H), 7.27 (d,  $J = 6.0$  Hz, 2H), 6.55 (d,  $J = 18.0$  Hz, 1H), 6.21 (ddd,  $J = 15.5, 8.1, 7.0$  Hz, 1H), 2.72 - 2.66 (m, 3H), 2.45 (dd,  $J = 12.0, 6.0$  Hz, 1H), 1.77 (s, 2H), 1.69 - 1.64 (m, 2H), 1.52 (s, 9H), 1.45 - 1.40 (m, 2H), 1.38 (s, 3H), 0.98 (t,  $J = 7.4$  Hz, 3H);  $^{13}\text{C NMR}$  (151 MHz,  $\text{CDCl}_3$ )  $\delta$  176.42, 142.11, 140.11, 138.05, 135.94, 133.63, 128.86, 127.05, 126.74, 126.56, 124.67, 81.00, 58.15, 44.61, 35.31, 33.64, 28.07, 26.47, 22.41, 13.98; **HRMS(ESI)**  $m/z$ :  $[\text{M}+\text{H}]^+$  Calculated for  $\text{C}_{26}\text{H}_{36}\text{NO}_2^+$  394.2741; found 394.2730.

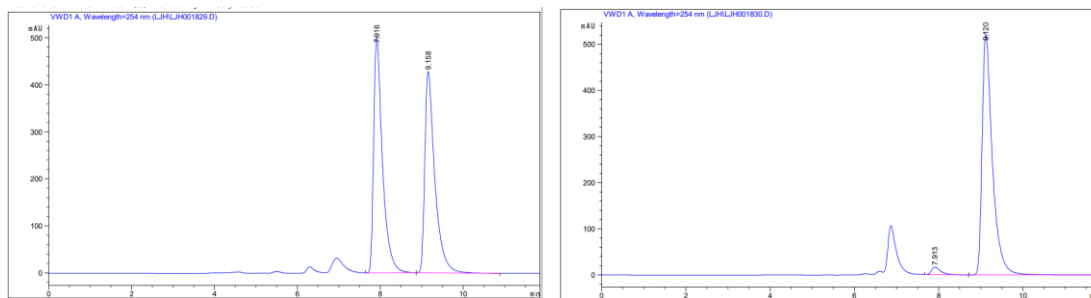

| Peak # | RetTime [min] | Type | Width [min] | Area [mAU*s] | Height [mAU] | Area %  |
|--------|---------------|------|-------------|--------------|--------------|---------|
| 1      | 7.916         | BB   | 0.2164      | 7369.56299   | 502.10611    | 50.6707 |
| 2      | 9.158         | BBA  | 0.2466      | 7174.47949   | 427.95782    | 49.3293 |

| Peak # | RetTime [min] | Type | Width [min] | Area [mAU*s] | Height [mAU] | Area %  |
|--------|---------------|------|-------------|--------------|--------------|---------|
| 1      | 7.913         | BB   | 0.2233      | 249.93297    | 16.50224     | 2.7485  |
| 2      | 9.120         | BBA  | 0.2518      | 8843.65234   | 521.50635    | 97.2515 |

***tert*-Butyl (*R,E*)-2-amino-5-(4'-bromo-[1,1'-biphenyl]-4-yl)-2-methylpent-4-enoate (4t):**

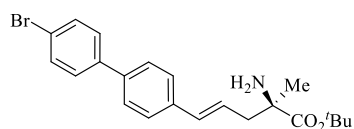

White solid (49.2 mg, 59%); m.p. = 79-80 °C;  $R_f$  = 0.25 (petroleum ether/ ethyl acetate = 2:1); the enantiomeric excess was determined to be 95% by HPLC analysis on Daicel Chirapak OD-

H column (hexane/isopropanol = 90/10, flow rate 0.8 mL/min, T = 30 °C), UV 254 nm,  $t_R$ (major) 14.233 min,  $t_R$ (minor) 8.447 min;  $[\alpha]_D^{20}$  = +12.65 ( $c$  = 0.71,  $\text{CHCl}_3$ );  $^1\text{H NMR}$  (600 MHz,  $\text{CDCl}_3$ )  $\delta$  7.57 (d,  $J$  = 6.0 Hz, 2H), 7.51 (d,  $J$  = 6.0 Hz, 2H), 7.47 (d,  $J$  = 6.0 Hz, 2H), 7.42 (d,  $J$  = 6.0 Hz, 2H), 6.53 (d,  $J$  = 18.0 Hz, 1H), 6.25 – 6.20 (m, 1H), 2.69 (dd,  $J$  = 12.0, 6.0 Hz, 1H), 2.44 (dd,  $J$  = 12.0, 6.0 Hz, 1H), 1.78 (s, 2H), 1.51 (s, 9H), 1.38 (s, 3H);  $^{13}\text{C NMR}$  (151 MHz,  $\text{CDCl}_3$ )  $\delta$  176.37, 139.65, 138.81, 136.65, 133.36, 131.88, 128.47, 127.02, 126.71, 125.31, 121.49, 81.04, 58.14, 44.59, 28.07, 26.45; **HRMS(ESI)**  $m/z$ :  $[\text{M}+\text{H}]^+$  Calculated for  $\text{C}_{22}\text{H}_{27}\text{BrNO}_2^+$  416.1220; found 416.1227.

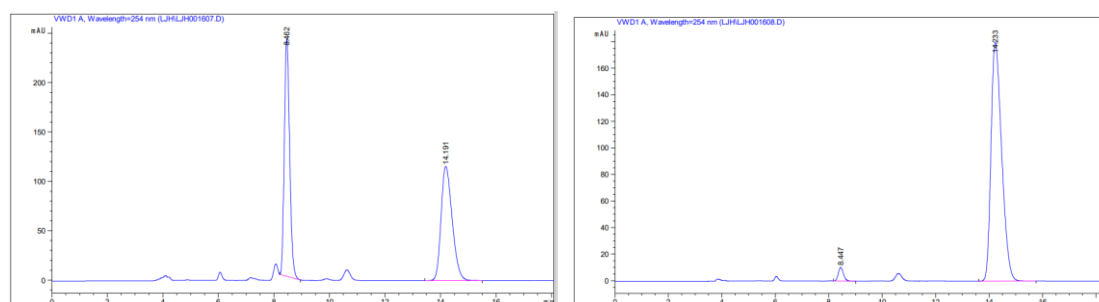

| Peak # | RetTime [min] | Type | Width [min] | Area [mAU*s] | Height [mAU] | Area %  |
|--------|---------------|------|-------------|--------------|--------------|---------|
| 1      | 8.462         | BB   | 0.2079      | 3201.81689   | 240.32304    | 49.9222 |
| 2      | 14.191        | BB   | 0.4303      | 3211.79443   | 115.70697    | 50.0778 |

| Peak # | RetTime [min] | Type | Width [min] | Area [mAU*s] | Height [mAU] | Area %  |
|--------|---------------|------|-------------|--------------|--------------|---------|
| 1      | 8.447         | BB   | 0.2055      | 136.65524    | 10.22416     | 2.6684  |
| 2      | 14.233        | BB   | 0.4282      | 4984.49316   | 179.89030    | 97.3316 |

***tert*-Butyl (*R,E*)-2-amino-5-(3,5-dimethylphenyl)-2-methylpent-4-enoate (4u):**

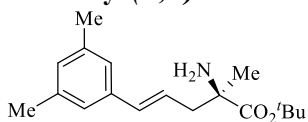

Colorless oil (40.3 mg, 71%);  $R_f$  = 0.23 (petroleum ether/ ethyl acetate = 2:1); the enantiomeric excess was determined to be 94% by HPLC

analysis on Daicel Chirapak OD-H column (hexane/isopropanol = 90/10, flow rate 1.0 mL/min, T = 30 °C), UV 254 nm,  $t_R$ (major) 7.968 min,  $t_R$ (minor) 5.922 min;  $[\alpha]_D^{20} = +10.86$  ( $c = 0.40$ ,  $\text{CHCl}_3$ );  $^1\text{H NMR}$  (600 MHz,  $\text{CDCl}_3$ )  $\delta$  6.98 (s, 2H), 6.89 (s, 1H), 6.44 (d,  $J = 12.0$  Hz, 1H), 6.26 – 5.99 (m, 1H), 2.65 (dd,  $J = 12.0, 6.0$  Hz, 1H), 2.41 (dd,  $J = 12.0, 6.0$  Hz, 1H), 2.32 (s, 6H), 1.82 (s, 2H), 1.50 (s, 9H), 1.36 (s, 3H);  $^{13}\text{C NMR}$  (151 MHz,  $\text{CDCl}_3$ )  $\delta$  176.38, 137.95, 137.12, 134.17, 129.06, 124.23, 124.09, 80.98, 58.13, 44.48, 28.04, 26.38, 21.25; **HRMS(ESI)**  $m/z$ :  $[\text{M}+\text{H}]^+$  Calculated for  $\text{C}_{18}\text{H}_{28}\text{NO}_2^+$  290.2115; found 290.2118.

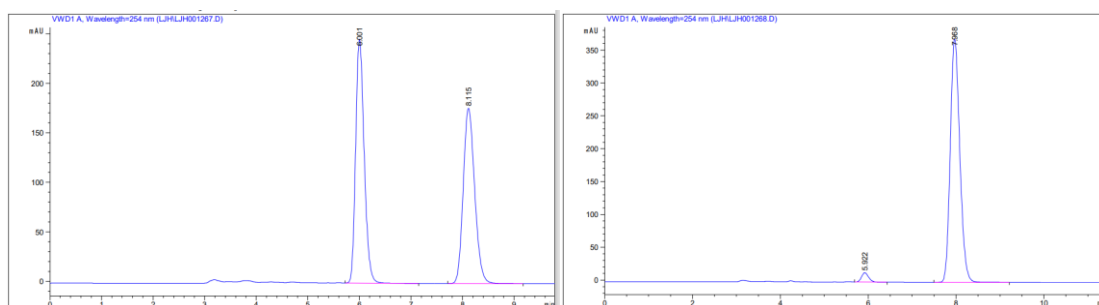

| Peak # | RetTime [min] | Type | Width [min] | Area [mAU*s] | Height [mAU] | Area %  | Peak # | RetTime [min] | Type | Width [min] | Area [mAU*s] | Height [mAU] | Area %  |
|--------|---------------|------|-------------|--------------|--------------|---------|--------|---------------|------|-------------|--------------|--------------|---------|
| 1      | 6.001         | BB   | 0.1794      | 2830.98486   | 246.00703    | 50.9080 | 1      | 5.922         | BB   | 0.1739      | 160.72661    | 14.24538     | 2.7997  |
| 2      | 8.115         | BB   | 0.2396      | 2729.99268   | 177.09204    | 49.0920 | 2      | 7.968         | BB   | 0.2342      | 5580.07520   | 370.04404    | 97.2003 |

***tert*-Butyl (*R,E*)-2-amino-5-(3,5-dimethoxyphenyl)-2-methylpent-4-enoate (4v):**

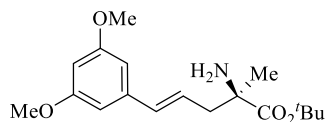

Colorless oil (41.7 mg, 65%);  $R_f = 0.21$  (petroleum ether/ ethyl acetate = 2:1); the enantiomeric excess was determined to be 94% by HPLC analysis on Daicel Chirapak OD-H column (hexane/isopropanol = 90/10, flow rate 1.0 mL/min, T = 30 °C), UV 254 nm,  $t_R$ (major) 9.257 min,  $t_R$ (minor) 7.908 min;  $[\alpha]_D^{20} = +11.20$  ( $c = 0.73$ ,  $\text{CHCl}_3$ );  $^1\text{H NMR}$  (600 MHz,  $\text{CDCl}_3$ )  $\delta$  6.42 (d,  $J = 6.0$  Hz, 2H), 6.33 (d,  $J = 12.0$  Hz, 1H), 6.28 (s, 1H), 6.08 -6.03 (m, 1H), 3.71 (s, 6H), 2.56 (dd,  $J = 13.5, 6.9$  Hz, 1H), 2.31 (dd,  $J = 13.5, 8.2$  Hz, 1H), 1.70 (s, 2H), 1.40 (s, 9H), 1.26 (s, 3H);  $^{13}\text{C NMR}$  (151 MHz,  $\text{CDCl}_3$ )  $\delta$  176.33, 160.89, 139.23, 133.95, 125.31, 104.31, 99.60, 81.02, 58.09, 55.30, 44.41, 28.03, 26.42; **HRMS(ESI)**  $m/z$ :  $[\text{M}+\text{H}]^+$  Calculated for  $\text{C}_{18}\text{H}_{28}\text{NO}_4^+$  322.2013; found 322.2019.

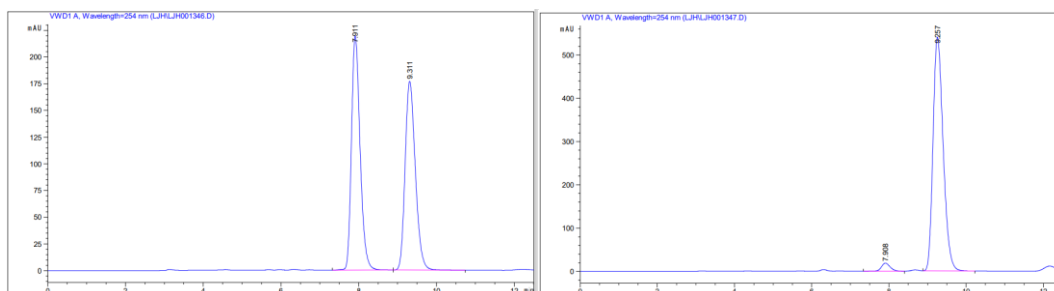

| Peak # | RetTime [min] | Type | Width [min] | Area [mAU*s] | Height [mAU] | Area %  | Peak # | RetTime [min] | Type | Width [min] | Area [mAU*s] | Height [mAU] | Area %  |
|--------|---------------|------|-------------|--------------|--------------|---------|--------|---------------|------|-------------|--------------|--------------|---------|
| 1      | 7.911         | BB   | 0.2374      | 3392.70923   | 219.28722    | 51.2158 | 1      | 7.908         | BB   | 0.2405      | 289.80240    | 18.55972     | 2.8608  |
| 2      | 9.311         | BB   | 0.2831      | 3231.62842   | 176.93367    | 48.7842 | 2      | 9.257         | BB   | 0.2824      | 9840.42676   | 540.32935    | 97.1392 |

***tert*-Butyl (*R,E*)-2-amino-5-(3,4-dimethylphenyl)-2-methylpent-4-enoate (4w):**

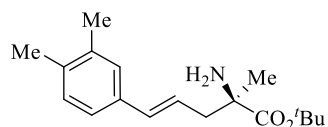

Colorless oil (39.7 mg, 69%);  $R_f = 0.24$  (petroleum ether/ ethyl acetate = 2:1); the enantiomeric excess was determined to be 95% by HPLC analysis on Daicel Chirapak OD-H column

(hexane/isopropanol = 80/20, flow rate 1.0 mL/min,  $T = 30\text{ }^\circ\text{C}$ ), UV 254 nm,  $t_R$ (major) 12.001 min,  $t_R$ (minor) 6.178 min;  $[\alpha]_D^{20} = +15.99$  ( $c = 0.55$ ,  $\text{CHCl}_3$ );  $^1\text{H NMR}$  (600 MHz,  $\text{CDCl}_3$ )  $\delta$  7.04 (s, 1H), 6.98 (q,  $J = 8.0$  Hz, 2H), 6.35 (d,  $J = 18.0$  Hz, 1H), 6.00 (dd,  $J = 18.0, 6.0$  Hz, 1H), 2.55 (dd,  $J = 12.0, 6.0$  Hz, 1H), 2.30 (dd,  $J = 12.0, 6.0$  Hz, 1H), 2.16 (s, 3H), 2.16 (s, 3H), 1.67 (s, 2H), 1.40 (s, 9H), 1.26 (s, 3H);  $^{13}\text{C NMR}$  (151 MHz,  $\text{CDCl}_3$ )  $\delta$  176.46, 136.58, 135.81, 134.88, 133.98, 129.79, 127.46, 123.63, 123.42, 80.94, 58.12, 44.53, 28.05, 26.43, 19.76, 19.48; **HRMS(ESI)**  $m/z$ :  $[\text{M}+\text{H}]^+$  Calculated for  $\text{C}_{18}\text{H}_{28}\text{NO}_2^+$  290.2115; found 290.2120.

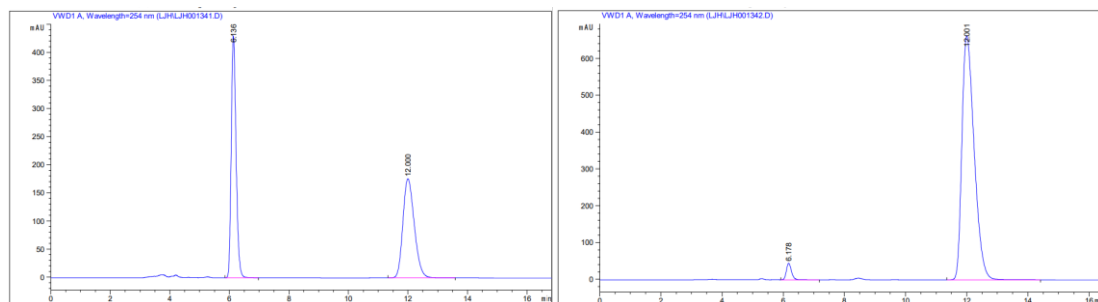

| Peak # | RetTime [min] | Type | Width [min] | Area [mAU*s] | Height [mAU] | Area %  | Peak # | RetTime [min] | Type | Width [min] | Area [mAU*s] | Height [mAU] | Area %  |
|--------|---------------|------|-------------|--------------|--------------|---------|--------|---------------|------|-------------|--------------|--------------|---------|
| 1      | 6.136         | BB   | 0.1739      | 4849.01611   | 429.66846    | 50.9066 | 1      | 6.178         | BB   | 0.1776      | 516.89404    | 45.03924     | 2.7274  |
| 2      | 12.000        | BB   | 0.4116      | 4676.30566   | 176.25706    | 49.0934 | 2      | 12.001        | BB   | 0.4310      | 1.84353e4    | 662.63470    | 97.2726 |

***tert*-Butyl (*R,E*)-2-amino-5-(3,4-dichlorophenyl)-2-methylpent-4-enoate (4x):**

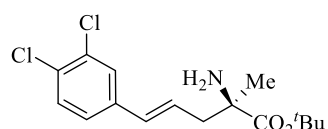

Colorless oil (37.2 mg, 56%);  $R_f = 0.22$  (petroleum ether/ ethyl acetate = 2:1); the enantiomeric excess was determined to be 88% by HPLC analysis on Daicel Chirapak OD-H column

(hexane/isopropanol = 90/10, flow rate 0.8 mL/min,  $T = 30\text{ }^\circ\text{C}$ ), UV 254 nm,  $t_R$ (major) 6.736 min,  $t_R$ (minor) 6.210 min;  $[\alpha]_D^{20} = +6.15$  ( $c = 0.48$ ,  $\text{CHCl}_3$ );  $^1\text{H NMR}$  (600 MHz,  $\text{CDCl}_3$ )  $\delta$  7.39 - 7.34 (m, 2H), 7.14 (dd,  $J = 12.0, 6.0$  Hz, 1H), 6.37 (d,  $J = 12.0$  Hz, 1H), 6.19 - 6.14 (m, 1H), 2.61 (dd,  $J = 12.0, 6.0$  Hz, 1H), 2.40 (dd,  $J = 12.0, 6.0$  Hz, 1H), 1.69 (s, 2H), 1.47 (s, 9H), 1.33 (s, 3H);  $^{13}\text{C NMR}$  (151 MHz,  $\text{CDCl}_3$ )  $\delta$  176.18, 137.32, 132.63, 131.51, 130.91, 130.41, 127.87, 127.19, 125.31, 81.12,

58.05, 44.39, 28.03, 26.37; **HRMS(ESI) m/z:**  $[M+H]^+$  Calculated for  $C_{16}H_{22}Cl_2NO_2^+$  330.1022; found 330.1020.

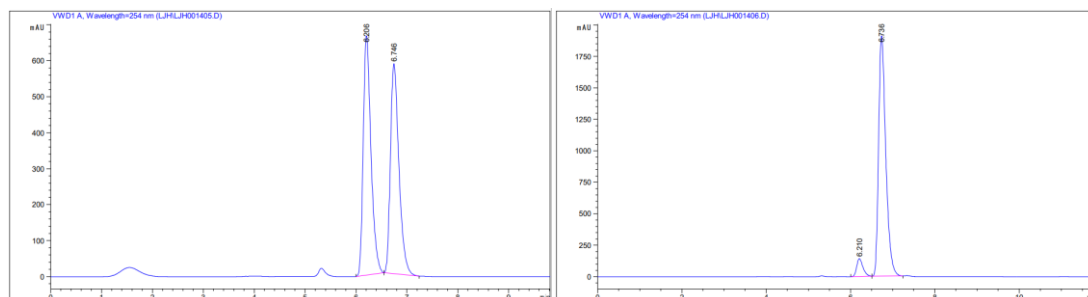

| Peak # | RetTime [min] | Type | Width [min] | Area [mAU*s] | Height [mAU] | Area %  |
|--------|---------------|------|-------------|--------------|--------------|---------|
| 1      | 6.206         | BB   | 0.1599      | 7036.67236   | 664.87317    | 50.9770 |
| 2      | 6.746         | BB   | 0.1761      | 6766.93994   | 583.77429    | 49.0230 |

  

| Peak # | RetTime [min] | Type | Width [min] | Area [mAU*s] | Height [mAU] | Area %  |
|--------|---------------|------|-------------|--------------|--------------|---------|
| 1      | 6.210         | BB   | 0.1568      | 1462.01611   | 141.75027    | 6.0911  |
| 2      | 6.736         | BB   | 0.1800      | 2.25406e4    | 1909.01563   | 93.9089 |

***tert*-Butyl (*R,E*)-2-amino-5-(3-fluoro-4-methylphenyl)-2-methylpent-4-enoate (**4y**):**

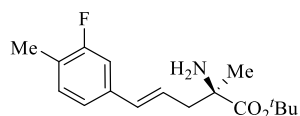

Colorless oil (39.1 mg, 66%);  $R_f = 0.25$  (petroleum ether/ ethyl acetate = 2:1); the enantiomeric excess was determined to be 94% by HPLC analysis on Daicel Chirapak IA-H column (hexane/isopropanol = 90/10, flow rate 0.8 mL/min,  $T = 30$  °C), UV 254 nm,  $t_R$ (major) 6.590 min,  $t_R$ (minor) 6.056 min;  $[\alpha]_D^{20} = +15.79$  ( $c = 0.42$ ,  $CHCl_3$ );  **$^1H$  NMR (600 MHz,  $CDCl_3$ )**  $\delta$  7.01 (t,  $J = 6.0$  Hz, 1H), 6.90 (d,  $J = 12.0$  Hz, 2H), 6.33 (d,  $J = 18.0$  Hz, 1H), 6.03 (dd,  $J = 12.0, 6.0$  Hz, 1H), 2.55 (dd,  $J = 12.0, 6.0$  Hz, 1H), 2.31 (dd,  $J = 12.0, 6.0$  Hz, 1H), 2.17 (s, 3H), 1.66 (s, 2H), 1.40 (s, 9H), 1.26 (s, 3H);  **$^{13}C$  NMR (151 MHz,  $CDCl_3$ )**  $\delta$  176.32, 162.28(d,  $J = 244.6$  Hz), 136.98(d,  $J = 7.6$  Hz), 132.89, 131.41(d,  $J = 6.1$  Hz), 125.09, 123.82(d,  $J = 9.1$  Hz), 121.74(d,  $J = 3.0$  Hz), 112.29(d,  $J = 22.7$  Hz), 81.04, 58.09, 44.42, 28.03, 26.41, 14.32; **HRMS(ESI) m/z:**  $[M+H]^+$  Calculated for  $C_{17}H_{25}FNO_2^+$  294.1864; found 294.1869.

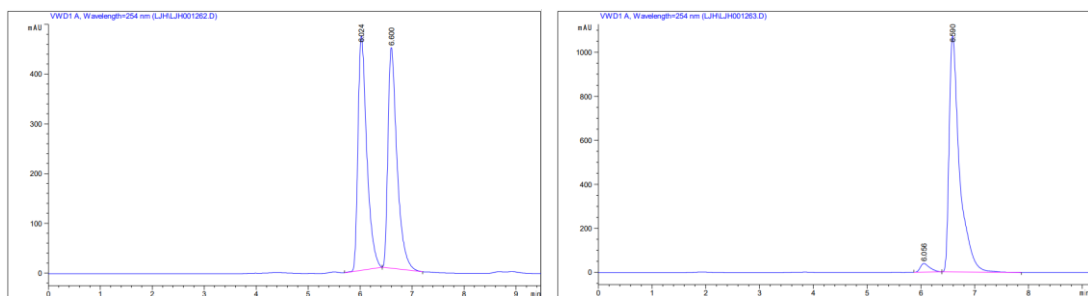

| Peak # | RetTime [min] | Type | Width [min] | Area [mAU*s] | Height [mAU] | Area %  |
|--------|---------------|------|-------------|--------------|--------------|---------|
| 1      | 6.024         | BB   | 0.1783      | 5553.04102   | 471.07623    | 50.7317 |
| 2      | 6.600         | BB   | 0.1826      | 5392.85254   | 443.67047    | 49.2683 |

  

| Peak # | RetTime [min] | Type | Width [min] | Area [mAU*s] | Height [mAU] | Area %  |
|--------|---------------|------|-------------|--------------|--------------|---------|
| 1      | 6.056         | BB   | 0.1798      | 480.87225    | 39.52296     | 3.2266  |
| 2      | 6.590         | BB   | 0.1962      | 1.44227e4    | 1072.67810   | 96.7734 |



***tert*-Butyl (*R,E*)-2-amino-5-(benzo[d][1,3]dioxol-5-yl)-2-methylpent-4-enoate (4z):**

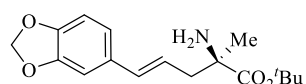

Colorless oil (37.2 mg, 61%);  $R_f = 0.22$  (petroleum ether/ ethyl acetate = 2:1); the enantiomeric excess was determined to be 94% by HPLC analysis on Daicel Chirapak OD-H column (hexane/isopropanol = 90/10, flow rate 0.8 mL/min,  $T = 30\text{ }^\circ\text{C}$ ), UV 254 nm,  $t_R(\text{major})$  11.148 min,  $t_R(\text{minor})$  8.565 min;  $[\alpha]_D^{20} = +13.00$  ( $c = 0.60$ ,  $\text{CHCl}_3$ );  **$^1\text{H NMR}$  (600 MHz,  $\text{CDCl}_3$ )**  $\delta$  6.88 (s, 1H), 6.76 (q,  $J = 8.0$  Hz, 2H), 6.40 (d,  $J = 18.0$  Hz, 1H), 5.99 – 5.97 (m, 1H), 5.95 (s, 2H), 2.62 (dd,  $J = 12.0, 6.0$  Hz, 1H), 2.37 (dd,  $J = 12.0, 6.0$  Hz, 1H), 1.81 (s, 2H), 1.48 (s, 9H), 1.34 (s, 3H);  **$^{13}\text{C NMR}$  (151 MHz,  $\text{CDCl}_3$ )**  $\delta$  176.38, 147.97, 146.99, 133.56, 131.72, 122.84, 120.67, 108.24, 105.54, 100.99, 80.98, 58.11, 44.40, 28.04, 26.38; **HRMS(ESI)**  $m/z$ :  $[\text{M}+\text{H}]^+$  Calculated for  $\text{C}_{17}\text{H}_{24}\text{NO}_4^+$  306.1700; found 306.1701.

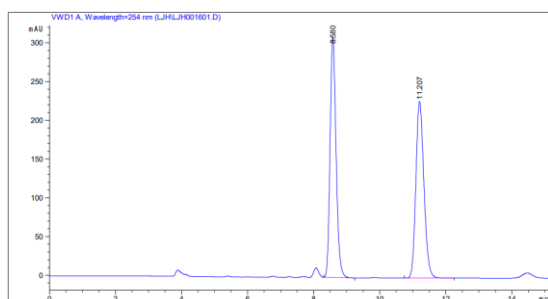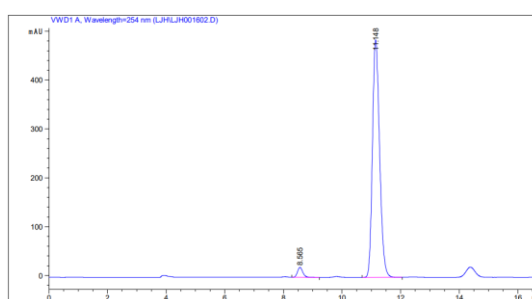

| Peak # | RetTime [min] | Type | Width [min] | Area [mAU*s] | Height [mAU] | Area %  | Peak # | RetTime [min] | Type | Width [min] | Area [mAU*s] | Height [mAU] | Area %  |
|--------|---------------|------|-------------|--------------|--------------|---------|--------|---------------|------|-------------|--------------|--------------|---------|
| 1      | 8.580         | BB   | 0.1953      | 3907.31104   | 309.79144    | 50.3951 | 1      | 8.565         | BB   | 0.1938      | 257.72379    | 20.42818     | 3.0269  |
| 2      | 11.207        | BB   | 0.2610      | 3846.03882   | 227.97629    | 49.6049 | 2      | 11.148        | BB   | 0.2637      | 8256.65137   | 486.23410    | 96.9731 |

***tert*-Butyl(*R,E*)-2-amino-5-(2,3-dihydrobenzo[b][1,4]dioxin-6-yl)-2-methylpent-4-enoate (4aa):**

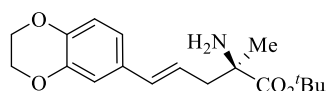

Colorless oil (38.4 mg, 60%);  $R_f = 0.24$  (petroleum ether/ ethyl acetate = 2:1); the enantiomeric excess was determined to be 93% by HPLC analysis on Daicel Chirapak OD-H column (hexane/isopropanol = 90/10, flow rate 0.8 mL/min,  $T = 30\text{ }^\circ\text{C}$ ), UV 254 nm,  $t_R(\text{major})$  17.776 min,  $t_R(\text{minor})$  13.160 min;  $[\alpha]_D^{20} = +10.39$  ( $c = 0.74$ ,  $\text{CHCl}_3$ );  **$^1\text{H NMR}$  (600 MHz,  $\text{CDCl}_3$ )**  $\delta$  6.78 - 6.70 (m, 3H), 6.28 (d,  $J = 12.0$  Hz, 1H), 5.89 (ddd,  $J = 15.5, 8.2, 7.0$  Hz, 1H), 4.17 (s, 4H), 2.54 (ddd,  $J = 13.5, 6.8, 1.1$  Hz, 1H), 2.28 (dd,  $J = 12.0, 6.0$  Hz, 1H), 1.67 (s, 2H), 1.40 (s, 9H), 1.25 (s, 3H);  **$^{13}\text{C NMR}$  (151 MHz,  $\text{CDCl}_3$ )**  $\delta$  176.40, 143.47, 143.07, 133.32, 131.07, 123.00, 119.56, 117.24, 114.69, 80.95, 64.43, 64.37, 58.10, 44.44, 28.05, 26.41; **HRMS(ESI)**  $m/z$ :  $[\text{M}+\text{H}]^+$  Calculated for  $\text{C}_{18}\text{H}_{26}\text{NO}_4^+$  320.1856; found 320.1852.

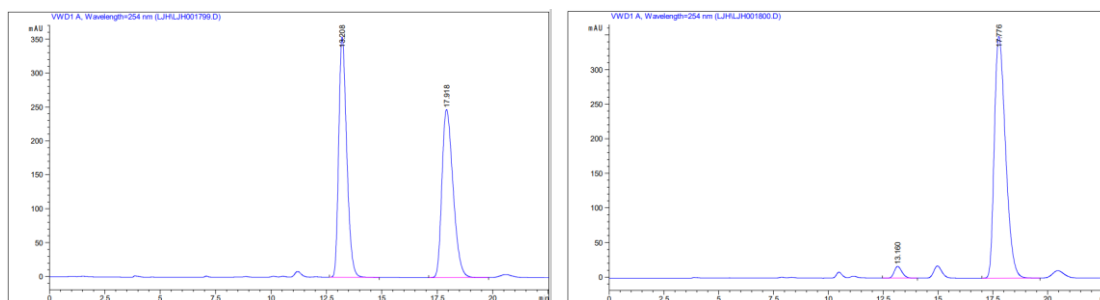

| Peak # | RetTime [min] | Type | Width [min] | Area [mAU*s] | Height [mAU] | Area %  |
|--------|---------------|------|-------------|--------------|--------------|---------|
| 1      | 13.208        | BB   | 0.3864      | 8900.60547   | 354.29892    | 50.6869 |
| 2      | 17.918        | BB   | 0.5464      | 8659.37500   | 247.66812    | 49.3131 |

  

| Peak # | RetTime [min] | Type | Width [min] | Area [mAU*s] | Height [mAU] | Area %  |
|--------|---------------|------|-------------|--------------|--------------|---------|
| 1      | 13.160        | BB   | 0.3791      | 417.01700    | 16.93716     | 3.2531  |
| 2      | 17.776        | BB   | 0.5543      | 1.24019e4    | 349.21277    | 96.7469 |

***tert*-Butyl (*R,E*)-2-amino-2-methyl-5-(naphthalen-2-yl)pent-4-enoate (4ab):**

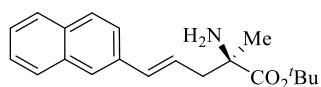

White solid (47.2 mg, 76%); m.p. = 76-77 °C  $R_f$  = 0.23 (petroleum ether/ ethyl acetate = 2:1); the enantiomeric excess was determined

to be 92% by HPLC analysis on Daicel Chirapak IA-H column (hexane/isopropanol = 90/10, flow rate 1.0 mL/min, T = 30 °C), UV 254 nm,  $t_R$ (major) 11.430 min,  $t_R$ (minor) 8.034 min;  $[\alpha]_D^{20} = +16.06$  ( $c = 0.60$ ,  $\text{CHCl}_3$ );  $^1\text{H NMR}$  (600 MHz,  $\text{CDCl}_3$ )  $\delta$  7.80 (dd,  $J = 12.7, 8.5$  Hz, 3H), 7.70 (s, 1H), 7.59 - 7.57 (m, 1H), 7.49 - 7.43 (m, 2H), 6.67 (d,  $J = 12.0$  Hz, 1H), 6.33 - 6.28 (m, 1H), 2.73 (ddd,  $J = 13.5, 6.8, 0.9$  Hz, 1H), 2.49 (dd,  $J = 12.0, 6.0$  Hz, 1H), 1.83 (s, 2H), 1.51 (s, 9H), 1.40 (s, 3H);  $^{13}\text{C NMR}$  (151 MHz,  $\text{CDCl}_3$ )  $\delta$  176.40, 134.66, 134.08, 133.64, 132.90, 128.17, 127.93, 127.66, 126.23, 125.90, 125.73, 125.19, 123.51, 81.05, 58.19, 44.69, 28.07, 26.46; **HRMS(ESI)**  $m/z$ :  $[\text{M}+\text{H}]^+$  Calculated for  $\text{C}_{20}\text{H}_{26}\text{NO}_2^+$  312.1958; found 312.1956.

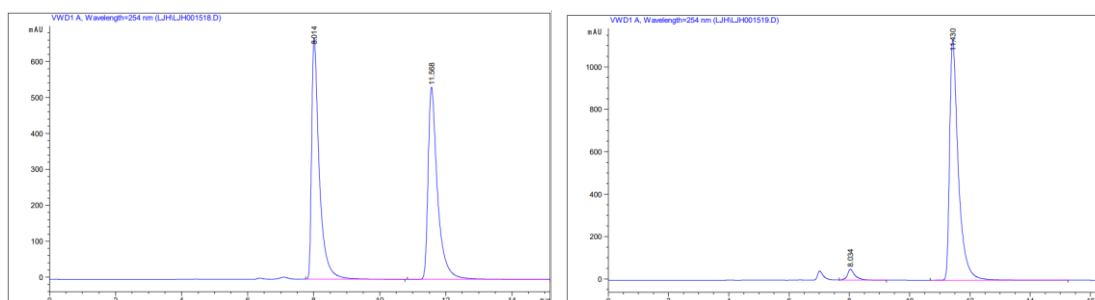

| Peak # | RetTime [min] | Type | Width [min] | Area [mAU*s] | Height [mAU] | Area %  |
|--------|---------------|------|-------------|--------------|--------------|---------|
| 1      | 8.014         | BB   | 0.2362      | 1.08207e4    | 671.12646    | 50.4418 |
| 2      | 11.568        | BBA  | 0.2932      | 1.06312e4    | 534.68170    | 49.5582 |

  

| Peak # | RetTime [min] | Type | Width [min] | Area [mAU*s] | Height [mAU] | Area %  |
|--------|---------------|------|-------------|--------------|--------------|---------|
| 1      | 8.034         | BB   | 0.2505      | 889.48541    | 50.89672     | 3.7592  |
| 2      | 11.430        | BB   | 0.2973      | 2.27723e4    | 1132.24475   | 96.2408 |

***tert*-Butyl (*R,E*)-2-amino-2-methyl-5-(1-tosyl-1H-indol-5-yl)pent-4-enoate (4ac):**

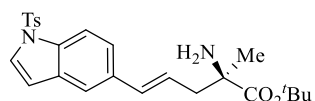

Colorless oil (46.3 mg, 51%);  $R_f$  = 0.24 (petroleum ether/ ethyl acetate = 1:1); the enantiomeric excess was determined to be 94% by HPLC

analysis on Daicel Chirapak IF-H column (hexane/isopropanol = 80/20, flow rate 1.0 mL/min, T =

30 °C), UV 254 nm,  $t_{R}(\text{major})$  18.124 min,  $t_{R}(\text{minor})$  16.188 min;  $[\alpha]_{D}^{20} = +16.47$  ( $c = 0.51$ ,  $\text{CHCl}_3$ );  **$^1\text{H}$  NMR (600 MHz,  $\text{CDCl}_3$ )**  $\delta$  7.90 (d,  $J = 6.0$  Hz, 1H), 7.74 (d,  $J = 6.0$  Hz, 2H), 7.52 (d,  $J = 6.0$  Hz, 1H), 7.43 (s, 1H), 7.32 (d,  $J = 6.0$  Hz, 1H), 7.20 (d,  $J = 6.0$  Hz, 2H), 6.60 (d,  $J = 3.2$  Hz, 1H), 6.52 (d,  $J = 18.0$  Hz, 1H), 6.13-6.07(m, 1H), 2.64 (dd,  $J = 18.0, 6.0$  Hz, 1H), 2.43 – 2.35 (m, 1H), 2.33 (s, 3H), 1.75 (s, 2H), 1.47 (s, 9H), 1.33 (s, 3H);  **$^{13}\text{C}$  NMR (151 MHz,  $\text{CDCl}_3$ )**  $\delta$  176.39, 144.93, 135.29, 134.23, 133.86, 132.80, 131.13, 129.87, 126.81, 124.13, 122.85, 119.06, 113.59, 109.20, 80.99, 58.12, 44.50, 28.05, 26.41, 21.54; **HRMS(ESI)**  $m/z$ :  $[\text{M}+\text{H}]^+$  Calculated for  $\text{C}_{25}\text{H}_{31}\text{N}_2\text{O}_4\text{S}^+$  455.1999; found 455.2000.

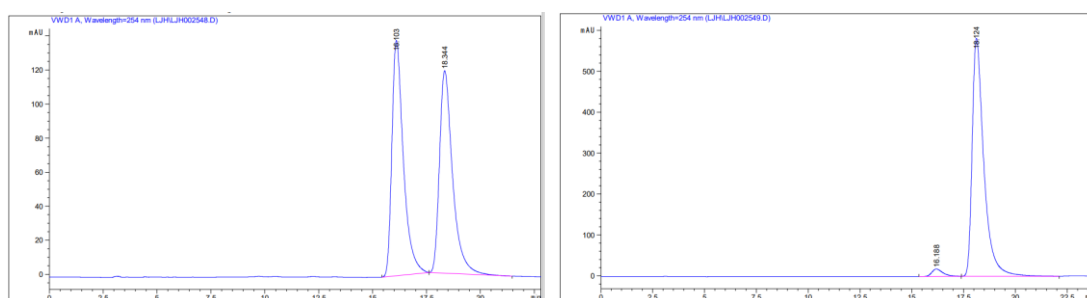

| Peak # | RetTime [min] | Type | Width [min] | Area [mAU*s] | Height [mAU] | Area %  | Peak # | RetTime [min] | Type | Width [min] | Area [mAU*s] | Height [mAU] | Area %  |
|--------|---------------|------|-------------|--------------|--------------|---------|--------|---------------|------|-------------|--------------|--------------|---------|
| 1      | 16.103        | BB   | 0.5569      | 5108.42334   | 138.09941    | 50.4489 | 1      | 16.188        | BB   | 0.5620      | 676.27881    | 18.12844     | 2.8870  |
| 2      | 18.344        | BB   | 0.6340      | 5017.51172   | 118.83975    | 49.5511 | 2      | 18.124        | BB   | 0.5834      | 2.27486e4    | 581.23383    | 97.1130 |

***tert*-Butyl (*R,4E,6E*)-2-amino-2-methyl-7-phenylhepta-4,6-dienoate (4ad):**

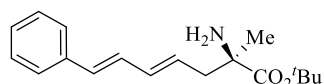

Colorless oil (35.6 mg, 62%);  $R_f = 0.22$  (petroleum ether/ ethyl acetate = 2:1); the enantiomeric excess was determined to be 96% by HPLC analysis on Daicel Chirapak IA-H column (hexane/isopropanol = 90/10, flow rate 1.0 mL/min,  $T = 30$  °C), UV 254 nm,  $t_{R}(\text{major})$  8.810 min,  $t_{R}(\text{minor})$  7.639 min;  $[\alpha]_{D}^{20} = +7.85$  ( $c = 0.76$ ,  $\text{CHCl}_3$ );  **$^1\text{H}$  NMR (600 MHz,  $\text{CDCl}_3$ )**  $\delta$  7.37 (d,  $J = 12.0$  Hz, 2H), 7.33 – 7.26 (m, 2H), 7.20 (t,  $J = 7.3$  Hz, 1H), 6.74 (dd,  $J = 18.0, 12.0$  Hz, 1H), 6.47 (d,  $J = 12.0$  Hz, 1H), 6.28 (dd,  $J = 12.0, 6.0$  Hz, 1H), 5.75 – 5.70 (m, 1H), 2.57 (dd,  $J = 12.0, 6.0$  Hz, 1H), 2.32 (dd,  $J = 12.0, 6.0$  Hz, 1H), 1.68 (s, 2H), 1.47 (s, 9H), 1.31 (s, 3H);  **$^{13}\text{C}$  NMR (151 MHz,  $\text{CDCl}_3$ )**  $\delta$  176.38, 137.36, 134.61, 131.45, 129.05, 128.75, 128.58, 127.39, 126.28, 80.97, 58.13, 44.39, 28.04, 26.43; **HRMS(ESI)**  $m/z$ :  $[\text{M}+\text{H}]^+$  Calculated for  $\text{C}_{18}\text{H}_{26}\text{NO}_2^+$  288.1958; found 288.1960.

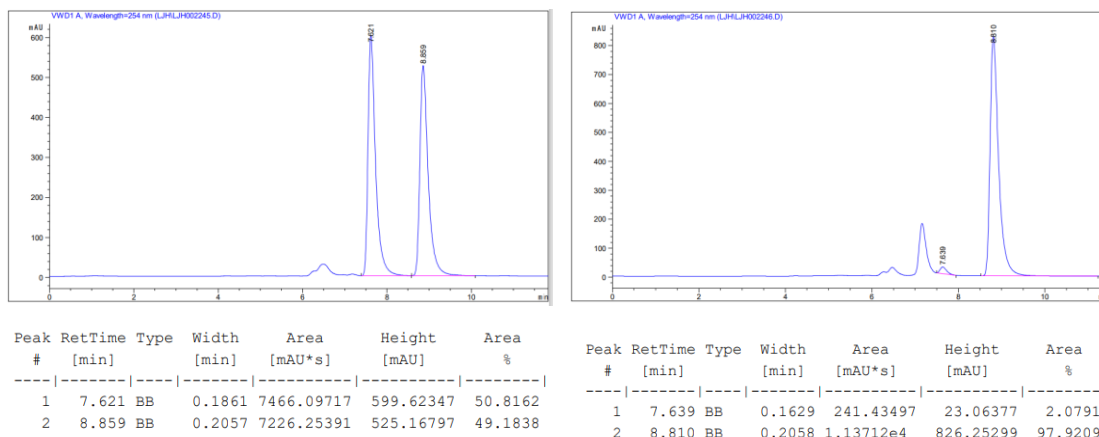

***tert*-Butyl (*R*,*4E*,*6E*)-2-amino-2-methyl-7-(*p*-tolyl)hepta-4,6-dienoate (**4ae**):**

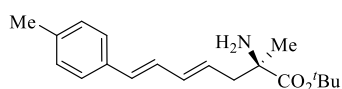

Colorless oil (37.9 mg, 64%);  $R_f = 0.22$  (petroleum ether/ ethyl acetate = 2:1); the enantiomeric excess was determined to be 95%

by HPLC analysis on Daicel Chirapak IF-H column (hexane/isopropanol = 90/10, flow rate 0.8 mL/min,  $T = 30\text{ }^\circ\text{C}$ ), UV 254 nm,  $t_R$ (major) 9.746 min,  $t_R$ (minor) 8.663 min;  $[\alpha]_D^{20} = +12.40$  ( $c = 0.72$ ,  $\text{CHCl}_3$ );  $^1\text{H NMR}$  (600 MHz,  $\text{CDCl}_3$ )  $\delta$  7.27 (d,  $J = 12.0$  Hz, 2H), 7.11 (d,  $J = 6.0$  Hz, 2H), 6.69 (dd,  $J = 12.0, 6.0$  Hz, 1H), 6.44 (d,  $J = 18.0$  Hz, 1H), 6.27 (dd,  $J = 12.0, 12.0$  Hz, 1H), 5.71-5.66 (m, 1H), 2.57 (dd,  $J = 18.0, 6.0$  Hz, 1H), 2.33 (s, 3H), 2.30 (d,  $J = 6.0$  Hz, 1H), 1.70 (s, 2H), 1.47 (s, 9H), 1.31 (s, 3H);  $^{13}\text{C NMR}$  (151 MHz,  $\text{CDCl}_3$ )  $\delta$  176.40, 137.26, 134.78, 134.57, 131.44, 129.30, 128.36, 127.80, 126.20, 80.96, 58.13, 44.39, 28.04, 26.41, 21.20; **HRMS(ESI)**  $m/z$ :  $[\text{M}+\text{H}]^+$  Calculated for  $\text{C}_{19}\text{H}_{28}\text{NO}_2^+$  302.2115; found 302.2119.

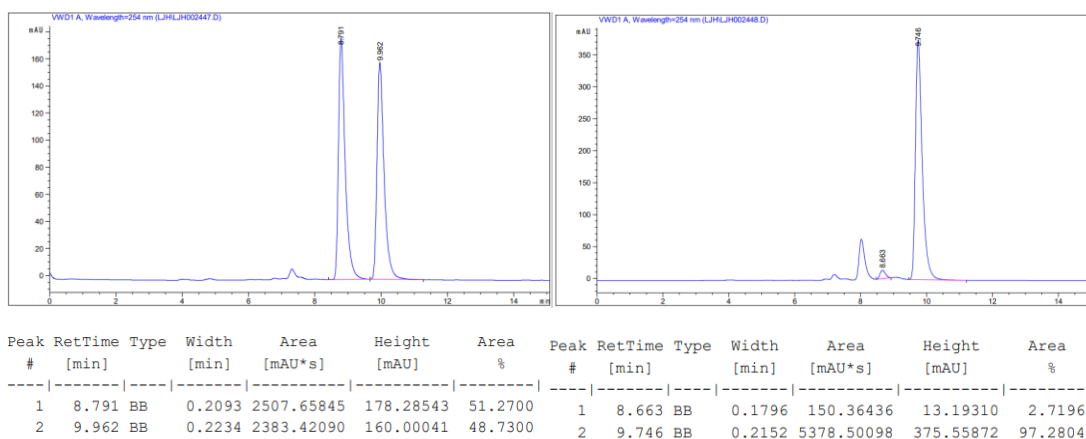

***tert*-Butyl (*R*,*4E*,*6E*)-7-([1,1'-biphenyl]-4-yl)-2-amino-2-methylhepta-4,6-dienoate (**4af**):**

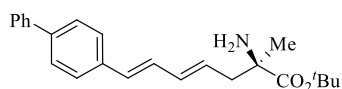

White solid (35.5 mg, 49%); m.p. = 109-110  $^\circ\text{C}$ ;  $R_f = 0.25$  (petroleum ether/ ethyl acetate = 2:1); the enantiomeric excess was

determined to be 94% by HPLC analysis on Daicel Chirapak IF-H column (hexane/isopropanol =

90/10, flow rate 0.8 mL/min, T = 30 °C), UV 254 nm,  $t_R$ (major) 12.036 min,  $t_R$ (minor) 11.365 min;  $[\alpha]_D^{20} = +28.42$  ( $c = 0.40$ ,  $\text{CHCl}_3$ );  $^1\text{H NMR}$  (600 MHz,  $\text{CDCl}_3$ )  $\delta$  7.59 (d,  $J = 12.0$  Hz, 2H), 7.54 (d,  $J = 6.0$  Hz, 2H), 7.45-7.41 (m, 4H), 7.33 (t,  $J = 6.0$  Hz, 1H), 6.78 (m, 1H), 6.51 (d,  $J = 18.0$  Hz, 1H), 6.31 (d,  $J = 6.0$  Hz, 1H), 5.77-5.72 (m, 1H), 2.59 (dd,  $J = 12.0, 6.0$  Hz, 1H), 2.34 (dd,  $J = 12.0, 6.0$  Hz, 1H), 1.71 (s, 2H), 1.48 (s, 9H), 1.32 (s, 3H);  $^{13}\text{C NMR}$  (151 MHz,  $\text{CDCl}_3$ )  $\delta$  176.38, 140.70, 140.13, 136.43, 134.68, 131.00, 129.18, 128.85, 128.79, 127.27, 126.89, 126.72, 81.01, 58.16, 44.43, 28.06, 26.44; **HRMS(ESI)**  $m/z$ :  $[\text{M}+\text{H}]^+$  Calculated for  $\text{C}_{24}\text{H}_{30}\text{NO}_2^+$  364.2271; found 364.2276.

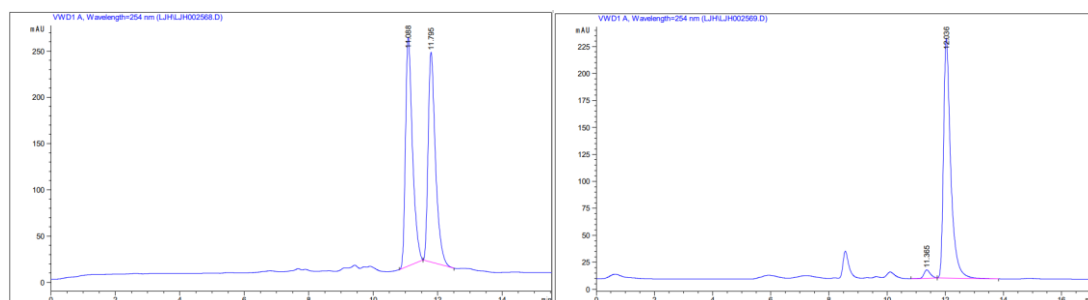

| Peak # | RetTime [min] | Type | Width [min] | Area [mAU*s] | Height [mAU] | Area %  | Peak # | RetTime [min] | Type | Width [min] | Area [mAU*s] | Height [mAU] | Area %  |
|--------|---------------|------|-------------|--------------|--------------|---------|--------|---------------|------|-------------|--------------|--------------|---------|
| 1      | 11.088        | BB   | 0.2256      | 3727.83984   | 247.05945    | 50.9610 | 1      | 11.365        | BB   | 0.2292      | 116.06969    | 7.72519      | 2.9569  |
| 2      | 11.795        | BB   | 0.2383      | 3587.24585   | 227.01712    | 49.0390 | 2      | 12.036        | BB   | 0.2556      | 3809.27783   | 221.92734    | 97.0431 |

***tert*-Butyl (*R,4E,6E*)-2-amino-7-(4-(benzyloxy)phenyl)-2-methylhepta-4,6-dienoate (4ag):**

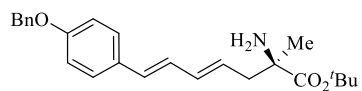

White solid (36.2 mg, 46%); m.p. = 78-79 °C;  $R_f = 0.24$  (petroleum ether/ ethyl acetate = 1:1); the enantiomeric excess

was determined to be 91% by HPLC analysis on Daicel Chirapak IF-H column (hexane/isopropanol = 90/10, flow rate 0.8 mL/min, T = 30 °C), UV 254 nm,  $t_R$ (major) 16.699 min,  $t_R$ (minor) 15.339 min;  $[\alpha]_D^{20} = +14.21$  ( $c = 0.57$ ,  $\text{CHCl}_3$ );  $^1\text{H NMR}$  (600 MHz,  $\text{CDCl}_3$ )  $\delta$  7.42 (d,  $J = 6.0$  Hz, 2H), 7.38 (t,  $J = 6.0$  Hz, 2H), 7.34 - 7.25 (m, 3H), 6.91 (d,  $J = 6.0$  Hz, 2H), 6.61 (dd,  $J = 12.0, 6.0$  Hz, 1H), 6.42 (d,  $J = 12.0$  Hz, 1H), 6.26 (dd,  $J = 18.0, 12.0$  Hz, 1H), 5.69-5.64 (m, 1H), 5.06 (s, 2H), 2.57 (dd,  $J = 12.0, 6.0$  Hz, 1H), 2.31 (dd,  $J = 12.0, 6.0$  Hz, 1H), 1.72 (s, 2H), 1.47 (s, 9H), 1.31 (s, 3H);  $^{13}\text{C NMR}$  (151 MHz,  $\text{CDCl}_3$ )  $\delta$  176.39, 158.37, 136.96, 134.83, 130.99, 130.47, 128.59, 127.98, 127.82, 127.47, 126.92, 115.06, 80.97, 70.08, 58.15, 44.38, 28.05, 26.40; **HRMS(ESI)**  $m/z$ :  $[\text{M}+\text{H}]^+$  Calculated for  $\text{C}_{25}\text{H}_{32}\text{NO}_3^+$  394.2377; found 394.2382.

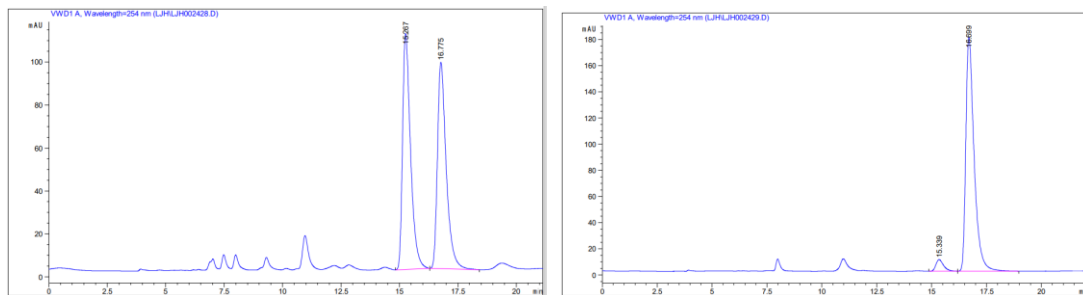

| Peak # | RetTime [min] | Type | Width [min] | Area [mAU*s] | Height [mAU] | Area %  |
|--------|---------------|------|-------------|--------------|--------------|---------|
| 1      | 15.267        | BB   | 0.3581      | 2601.28076   | 109.77973    | 50.8470 |
| 2      | 16.775        | BB   | 0.3942      | 2514.61450   | 96.10860     | 49.1530 |

  

| Peak # | RetTime [min] | Type | Width [min] | Area [mAU*s] | Height [mAU] | Area %  |
|--------|---------------|------|-------------|--------------|--------------|---------|
| 1      | 15.339        | BB   | 0.3662      | 215.64597    | 8.93388      | 4.3969  |
| 2      | 16.699        | BB   | 0.3933      | 4688.85938   | 178.84898    | 95.6031 |

**tert-Butyl (*R,E*)-2-amino-2-ethyl-5-phenylpent-4-enoate (5a):**

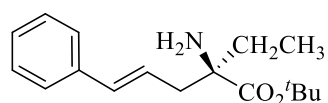

Colorless oil (34.7 mg, 63%);  $R_f = 0.22$  (petroleum ether/ ethyl acetate = 5:1); the enantiomeric excess was determined to be 94%

by HPLC analysis on Daicel Chirapak IA-H column (hexane/isopropanol = 95/5, flow rate 0.8 mL/min,  $T = 30\text{ }^\circ\text{C}$ ), UV 254 nm,  $t_R$ (major) 9.130 min,  $t_R$ (minor) 7.358 min;  $[\alpha]_D^{20} = +22.34$  ( $c = 0.48$ ,  $\text{CHCl}_3$ );  $^1\text{H NMR}$  (600 MHz,  $\text{CDCl}_3$ )  $\delta$  7.26 – 7.19 (m, 4H), 7.14 (t,  $J = 7.2$  Hz, 1H), 6.41 (d,  $J = 12.0$  Hz, 1H), 6.05 (ddd,  $J = 15.5, 8.3, 6.8$  Hz, 1H), 2.60 (ddd,  $J = 13.5, 6.7, 1.0$  Hz, 1H), 2.29 (dd,  $J = 13.5, 8.5$  Hz, 1H), 1.78 - 1.72 (m, 1H), 1.61 (s, 2H), 1.54 – 1.48 (m, 1H), 1.41 (s, 9H), 0.83 (t,  $J = 6.0$  Hz, 3H);  $^{13}\text{C NMR}$  (151 MHz,  $\text{CDCl}_3$ )  $\delta$  175.86, 137.20, 134.01, 128.52, 127.32, 126.16, 124.66, 81.01, 61.53, 43.42, 32.99, 28.10, 8.20; **HRMS(ESI)**  $m/z$ :  $[\text{M}+\text{H}]^+$  Calculated for  $\text{C}_{17}\text{H}_{26}\text{NO}_2^+$  276.1958; found 276.1954.

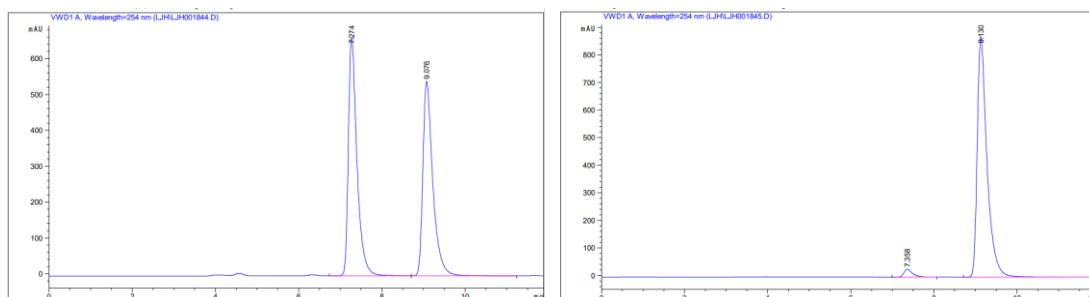

| Peak # | RetTime [min] | Type | Width [min] | Area [mAU*s] | Height [mAU] | Area %  |
|--------|---------------|------|-------------|--------------|--------------|---------|
| 1      | 7.274         | BB   | 0.2157      | 9550.26465   | 664.84900    | 51.4850 |
| 2      | 9.076         | BB   | 0.2477      | 8999.33691   | 541.83380    | 48.5150 |

  

| Peak # | RetTime [min] | Type | Width [min] | Area [mAU*s] | Height [mAU] | Area %  |
|--------|---------------|------|-------------|--------------|--------------|---------|
| 1      | 7.358         | BB   | 0.2143      | 416.89499    | 28.76424     | 2.8414  |
| 2      | 9.130         | BB   | 0.2418      | 1.42551e4    | 871.68939    | 97.1586 |

**tert-Butyl (*R*)-2-amino-2-cinnamylhexanoate (5b):**

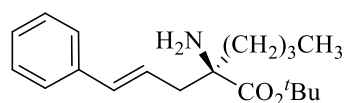

Colorless oil (35.1 mg, 57%);  $R_f = 0.24$  (petroleum ether/ ethyl acetate = 5:1); the enantiomeric excess was determined to be 93%

by HPLC analysis on Daicel Chirapak IA-H column (hexane/isopropanol = 90/10, flow rate 0.8

mL/min, T = 30 °C), UV 254 nm,  $t_R$ (major) 7.138 min,  $t_R$ (minor) 6.042 min;  $[\alpha]_D^{20} = +15.38$  ( $c = 0.31$ ,  $\text{CHCl}_3$ );  $^1\text{H NMR}$  (600 MHz,  $\text{CDCl}_3$ )  $\delta$  7.33 – 7.26 (m, 4H), 7.21 (t,  $J = 6.0$  Hz, 1H), 6.48 (d,  $J = 12.0$  Hz, 1H), 6.11 (ddd,  $J = 15.5, 8.4, 6.7$  Hz, 1H), 2.67 (ddd,  $J = 13.5, 6.6, 1.0$  Hz, 1H), 2.36 (dd,  $J = 12.0, 6.0$  Hz, 1H), 1.80 – 1.75 (m, 1H), 1.68 (s, 2H), 1.57 – 1.52 (m, 1H), 1.48 (s, 9H), 1.40 – 1.28 (m, 3H), 1.22 – 1.12 (m, 1H), 0.91 (t,  $J = 6.0$  Hz, 3H);  $^{13}\text{C NMR}$  (151 MHz,  $\text{CDCl}_3$ )  $\delta$  176.02, 137.20, 134.04, 128.52, 127.32, 126.17, 124.60, 80.99, 61.21, 43.78, 39.86, 28.10, 26.06, 23.00, 13.96; **HRMS(ESI)**  $m/z$ :  $[\text{M}+\text{H}]^+$  Calculated for  $\text{C}_{19}\text{H}_{30}\text{NO}_2^+$  304.2271; found 304.2268.

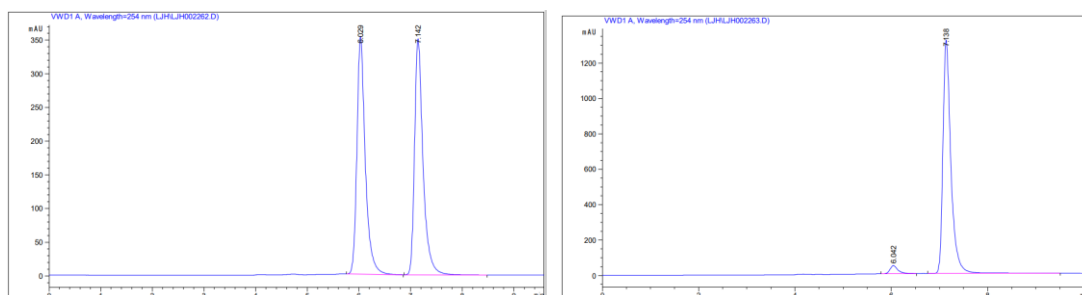

| Peak # | RetTime [min] | Type | Width [min] | Area [mAU*s] | Height [mAU] | Area %  |
|--------|---------------|------|-------------|--------------|--------------|---------|
| 1      | 6.029         | BB   | 0.1680      | 3969.00195   | 352.06573    | 49.8332 |
| 2      | 7.142         | BB   | 0.1711      | 3995.56738   | 350.09576    | 50.1668 |

  

| Peak # | RetTime [min] | Type | Width [min] | Area [mAU*s] | Height [mAU] | Area %  |
|--------|---------------|------|-------------|--------------|--------------|---------|
| 1      | 6.042         | BB   | 0.1692      | 520.57434    | 45.74467     | 3.3365  |
| 2      | 7.138         | BB   | 0.1715      | 1.50819e4    | 1316.65442   | 96.6635 |

***tert*-Butyl (*R,E*)-2-amino-2-isobutyl-5-phenylpent-4-enoate (**5c**):**

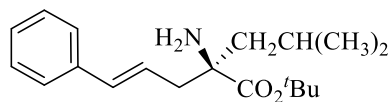

Colorless oil (38.9 mg, 64%);  $R_f = 0.26$  (petroleum ether/ ethyl acetate = 5:1); the enantiomeric excess was determined to be

94% by HPLC analysis on Daicel Chirapak IA-H column (hexane/isopropanol = 90/10, flow rate 0.8 mL/min, T = 30 °C), UV 254 nm,  $t_R$ (major) 6.859 min,  $t_R$ (minor) 5.679 min;  $[\alpha]_D^{20} = +18.44$  ( $c = 0.30$ ,  $\text{CHCl}_3$ );  $^1\text{H NMR}$  (600 MHz,  $\text{CDCl}_3$ )  $\delta$  7.33 – 7.26 (m, 4H), 7.21 (t,  $J = 7.1$  Hz, 1H), 6.47 (d,  $J = 18.0$  Hz, 1H), 6.09 (ddd,  $J = 15.4, 8.5, 6.7$  Hz, 1H), 2.66 (ddd,  $J = 13.5, 6.6, 1.1$  Hz, 1H), 2.33 (dd,  $J = 13.4, 8.6$  Hz, 1H), 1.85 – 1.73 (m, 2H), 1.68 (s, 2H), 1.53 (q,  $J = 8.1$  Hz, 1H), 1.48 (s, 9H), 0.97 (d,  $J = 6.0$  Hz, 3H), 0.90 (d,  $J = 6.0$  Hz, 3H);  $^{13}\text{C NMR}$  (151 MHz,  $\text{CDCl}_3$ )  $\delta$  176.51, 137.17, 134.22, 128.53, 127.34, 126.18, 124.33, 81.14, 60.98, 48.42, 45.36, 28.08, 24.69, 24.50, 23.41; **HRMS(ESI)**  $m/z$ :  $[\text{M}+\text{H}]^+$  Calculated for  $\text{C}_{19}\text{H}_{30}\text{NO}_2^+$  304.2271; found 304.2268.

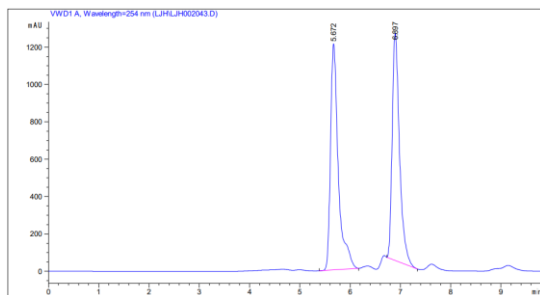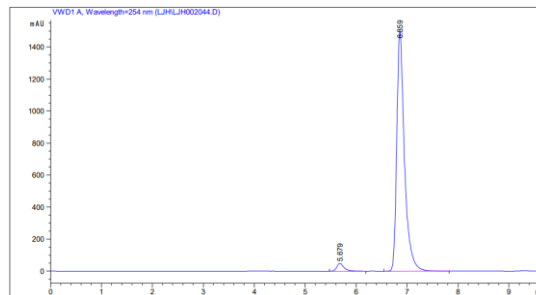

| Peak # | RetTime [min] | Type | Width [min] | Area [mAU*s] | Height [mAU] | Area %  |
|--------|---------------|------|-------------|--------------|--------------|---------|
| 1      | 5.672         | BB   | 0.1596      | 1.30817e4    | 1210.39148   | 51.5057 |
| 2      | 6.897         | BB   | 0.1532      | 1.23169e4    | 1215.31604   | 48.4943 |

| Peak # | RetTime [min] | Type | Width [min] | Area [mAU*s] | Height [mAU] | Area %  |
|--------|---------------|------|-------------|--------------|--------------|---------|
| 1      | 5.679         | BB   | 0.1476      | 477.93964    | 48.24855     | 2.9397  |
| 2      | 6.859         | BB   | 0.1567      | 1.57802e4    | 1494.67444   | 97.0603 |

***tert*-Butyl (*R,E*)-2-amino-2-(3-(4-methoxyphenyl)allyl)heptanoate (**5d**):**

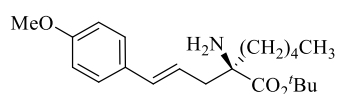

Colorless oil (41.6 mg, 60%);  $R_f = 0.24$  (petroleum ether/ ethyl acetate = 2:1); the enantiomeric excess was determined to be 94%

by HPLC analysis on Daicel Chirapak IA-H column (hexane/isopropanol = 90/10, flow rate 0.8 mL/min,  $T = 30\text{ }^\circ\text{C}$ ), UV 254 nm,  $t_R(\text{major})$  9.144 min,  $t_R(\text{minor})$  6.795 min;  $[\alpha]_D^{20} = +17.74$  ( $c = 0.62$ ,  $\text{CHCl}_3$ );  $^1\text{H NMR}$  (600 MHz,  $\text{CDCl}_3$ )  $\delta$  7.25 (d,  $J = 6.0$  Hz, 2H), 6.83 (d,  $J = 12.0$  Hz, 2H), 6.42 (d,  $J = 18.0$  Hz, 1H), 5.98 – 5.93 (m, 1H), 3.79 (s, 3H), 2.65 (dd,  $J = 12.0, 6.0$  Hz, 1H), 2.33 (dd,  $J = 13.5, 8.5$  Hz, 1H), 1.78 – 1.73 (m, 1H), 1.72 (s, 2H), 1.55 – 1.50 (m, 1H), 1.47 (s, 9H), 1.40 – 1.36 (m, 1H), 1.33 – 1.26 (m, 4H), 1.21 – 1.16 (m, 1H), 0.89 (t,  $J = 7.0$  Hz, 3H);  $^{13}\text{C NMR}$  (151 MHz,  $\text{CDCl}_3$ )  $\delta$  176.09, 159.03, 133.44, 130.06, 127.29, 122.25, 113.95, 80.90, 61.26, 55.27, 43.80, 40.14, 32.10, 28.10, 23.52, 22.46, 13.96; **HRMS(ESI)**  $m/z$ :  $[\text{M}+\text{H}]^+$  Calculated for  $\text{C}_{21}\text{H}_{34}\text{NO}_3^+$  348.2533; found 348.2535.

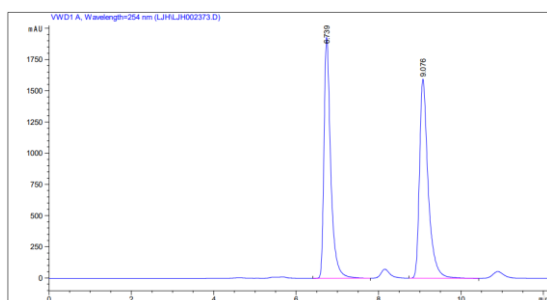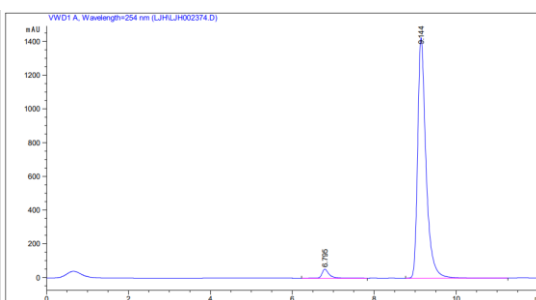

| Peak # | RetTime [min] | Type | Width [min] | Area [mAU*s] | Height [mAU] | Area %  |
|--------|---------------|------|-------------|--------------|--------------|---------|
| 1      | 6.739         | BB   | 0.1699      | 2.18336e4    | 1929.86108   | 48.5026 |
| 2      | 9.076         | BB   | 0.2162      | 2.31817e4    | 1594.78406   | 51.4974 |

| Peak # | RetTime [min] | Type | Width [min] | Area [mAU*s] | Height [mAU] | Area %  |
|--------|---------------|------|-------------|--------------|--------------|---------|
| 1      | 6.795         | BB   | 0.1763      | 645.71362    | 53.87347     | 3.1069  |
| 2      | 9.144         | BB   | 0.2115      | 2.01375e4    | 1425.53528   | 96.8931 |

***tert*-Butyl (*S,E*)-2-amino-5-(4-methoxyphenyl)-2-phenylpent-4-enoate (**5e**):**

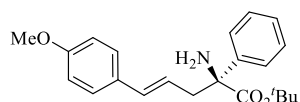

Colorless oil (45.1 mg, 64%);  $R_f = 0.26$  (petroleum ether/ ethyl acetate = 2:1); the enantiomeric excess was determined to be 95% by HPLC



analysis on Daicel Chirapak IA-H column (hexane/isopropanol = 90/10, flow rate 0.8 mL/min, T = 30 °C), UV 254 nm,  $t_R$ (major) 13.609 min,  $t_R$ (minor) 10.020 min;  $[\alpha]_D^{20} = -19.11$  ( $c = 0.59$ ,  $\text{CHCl}_3$ );  **$^1\text{H NMR}$  (600 MHz,  $\text{CDCl}_3$ )**  $\delta$  7.57 (d,  $J = 6.0$  Hz, 2H), 7.35 (t,  $J = 7.7$  Hz, 2H), 7.29 – 7.24 (m, 3H), 6.83 (d,  $J = 12.0$  Hz, 2H), 6.49 (d,  $J = 18.0$  Hz, 1H), 6.01 – 5.96 (m, 1H), 3.79 (s, 3H), 3.09 (dd,  $J = 12.0$ , 6.0 Hz, 1H), 2.71 (dd,  $J = 18.0$ , 12.0 Hz, 1H), 1.98 (s, 2H), 1.45 (s, 9H);  **$^{13}\text{C NMR}$  (151 MHz,  $\text{CDCl}_3$ )**  $\delta$  174.35, 159.11, 143.52, 134.13, 130.01, 128.31, 127.35, 127.28, 125.43, 122.37, 113.98, 81.66, 63.78, 55.30, 43.94, 27.92; **HRMS(ESI)**  $m/z$ :  $[\text{M}+\text{H}]^+$  Calculated for  $\text{C}_{22}\text{H}_{28}\text{NO}_3^+$  354.2064; found 354.2057.

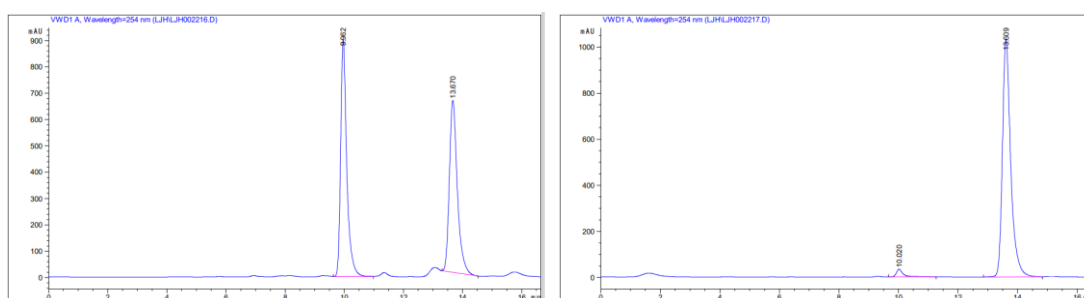

| Peak # | RetTime [min] | Type | Width [min] | Area [mAU*s] | Height [mAU] | Area %  | Peak # | RetTime [min] | Type | Width [min] | Area [mAU*s] | Height [mAU] | Area %  |
|--------|---------------|------|-------------|--------------|--------------|---------|--------|---------------|------|-------------|--------------|--------------|---------|
| 1      | 9.962         | BB   | 0.2136      | 1.28701e4    | 899.45239    | 51.2938 | 1      | 10.020        | BB   | 0.2370      | 545.73926    | 33.44857     | 2.6634  |
| 2      | 13.670        | BB   | 0.2839      | 1.22209e4    | 653.01886    | 48.7062 | 2      | 13.609        | BB   | 0.2901      | 1.99443e4    | 1029.91016   | 97.3366 |

***tert*-Butyl (*S,E*)-2-amino-5-(4-methoxyphenyl)-2-(*p*-tolyl)pent-4-enoate (**5f**):**

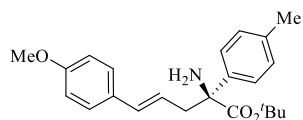

Colorless oil (44.7 mg, 61%);  $R_f = 0.23$  (petroleum ether/ ethyl acetate = 2:1); the enantiomeric excess was determined to be 96% by HPLC analysis on Daicel Chirapak IA-H column (hexane/isopropanol = 90/10, flow rate 0.8 mL/min, T = 30 °C), UV 254 nm,  $t_R$ (major) 14.001 min,  $t_R$ (minor) 10.460 min;  $[\alpha]_D^{20} = -25.77$  ( $c = 0.59$ ,  $\text{CHCl}_3$ );  **$^1\text{H NMR}$  (600 MHz,  $\text{CDCl}_3$ )**  $\delta$  7.45 (d,  $J = 6.0$  Hz, 2H), 7.25 (d,  $J = 12.0$  Hz, 2H), 7.16 (d,  $J = 6.0$  Hz, 2H), 6.83 (d,  $J = 6.0$  Hz, 2H), 6.48 (d,  $J = 18.0$  Hz, 1H), 6.01 – 5.96 (m, 1H), 3.79 (s, 3H), 3.07 (dd,  $J = 13.6$ , 6.8 Hz, 1H), 2.69 (dd,  $J = 13.5$ , 8.0 Hz, 1H), 2.34 (s, 3H), 1.95 (s, 2H), 1.44 (s, 9H);  **$^{13}\text{C NMR}$  (151 MHz,  $\text{CDCl}_3$ )**  $\delta$  174.48, 159.09, 140.58, 136.87, 134.03, 130.05, 129.01, 127.34, 125.31, 122.50, 113.97, 81.56, 63.56, 55.29, 43.98, 27.96, 20.99; **HRMS(ESI)**  $m/z$ :  $[\text{M}+\text{H}]^+$  Calculated for  $\text{C}_{23}\text{H}_{30}\text{NO}_3^+$  368.2220; found 368.2223.

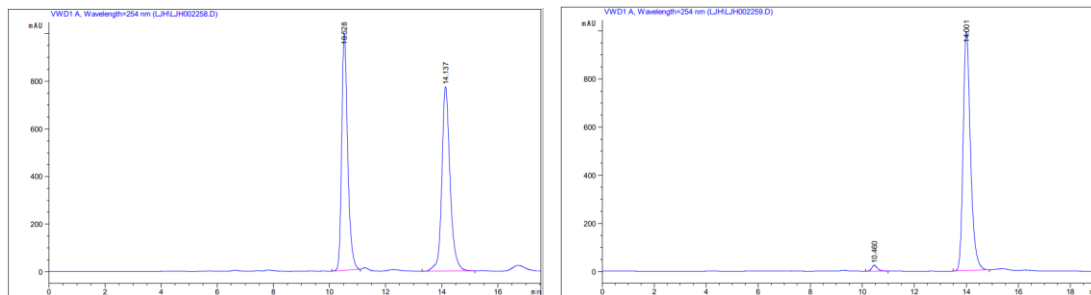

| Peak # | RetTime [min] | Type | Width [min] | Area [mAU*s] | Height [mAU] | Area %  |
|--------|---------------|------|-------------|--------------|--------------|---------|
| 1      | 10.528        | BB   | 0.2256      | 1.47435e4    | 993.37024    | 48.2203 |
| 2      | 14.137        | BB   | 0.3082      | 1.58318e4    | 775.26245    | 51.7797 |

  

| Peak # | RetTime [min] | Type | Width [min] | Area [mAU*s] | Height [mAU] | Area %  |
|--------|---------------|------|-------------|--------------|--------------|---------|
| 1      | 10.460        | BB   | 0.2254      | 367.70737    | 24.59619     | 1.8547  |
| 2      | 14.001        | BB   | 0.2972      | 1.94579e4    | 992.65302    | 98.1453 |

***tert*-Butyl (*S,E*)-2-amino-2-(4-chlorophenyl)-5-(4-methoxyphenyl)pent-4-enoate (**5g**):**

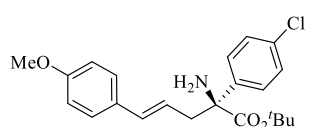

Colorless oil (44.9 mg, 58%);  $R_f = 0.21$  (petroleum ether/ ethyl acetate = 2:1); the enantiomeric excess was determined to be 96% by HPLC analysis on Daicel Chirapak IA-H column (hexane/isopropanol = 80/20, flow rate 0.8 mL/min,  $T = 30\text{ }^\circ\text{C}$ ), UV 254 nm,  $t_R$ (major) 10.633 min,  $t_R$ (minor) 7.968 min;  $[\alpha]_D^{20} = -37.78$  ( $c = 0.51$ ,  $\text{CHCl}_3$ );  $^1\text{H NMR}$  (600 MHz,  $\text{CDCl}_3$ )  $\delta$  7.53 (d,  $J = 6.0$  Hz, 2H), 7.32 (d,  $J = 12.0$  Hz, 2H), 7.25 (d,  $J = 6.0$  Hz, 2H), 6.83 (d,  $J = 12.0$  Hz, 2H), 6.47 (d,  $J = 15.8$  Hz, 1H), 5.97 – 5.92 (m, 1H), 3.79 (s, 3H), 3.04 (dd,  $J = 12.0, 6.0$  Hz, 1H), 2.66 (dd,  $J = 12.0, 6.0$  Hz, 1H), 1.92 (s, 2H), 1.44 (s, 9H);  $^{13}\text{C NMR}$  (151 MHz,  $\text{CDCl}_3$ )  $\delta$  173.95, 159.19, 142.03, 134.40, 133.17, 129.83, 128.39, 127.37, 127.07, 121.86, 114.00, 81.97, 63.43, 55.30, 44.05, 27.92; **HRMS(ESI)**  $m/z$ :  $[\text{M}+\text{H}]^+$  Calculated for  $\text{C}_{22}\text{H}_{27}\text{ClNO}_3^+$  388.1674; found 388.1676.

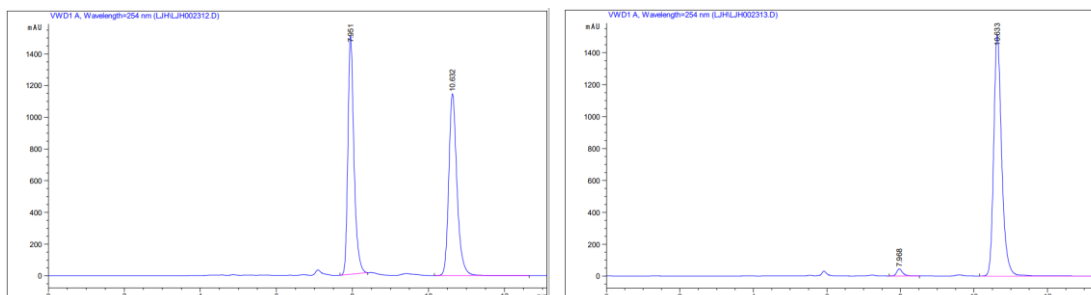

| Peak # | RetTime [min] | Type | Width [min] | Area [mAU*s] | Height [mAU] | Area %  |
|--------|---------------|------|-------------|--------------|--------------|---------|
| 1      | 7.951         | BB   | 0.1688      | 1.66900e4    | 1504.07629   | 49.2703 |
| 2      | 10.632        | BB   | 0.2274      | 1.71844e4    | 1146.46521   | 50.7297 |

  

| Peak # | RetTime [min] | Type | Width [min] | Area [mAU*s] | Height [mAU] | Area %  |
|--------|---------------|------|-------------|--------------|--------------|---------|
| 1      | 7.968         | BB   | 0.1683      | 493.05054    | 44.12591     | 2.1240  |
| 2      | 10.633        | BBA  | 0.2280      | 2.27206e4    | 1510.63049   | 97.8760 |

***tert*-Butyl (*S,E*)-2-amino-2-benzyl-5-(4-methoxyphenyl)pent-4-enoate (**5h**):**

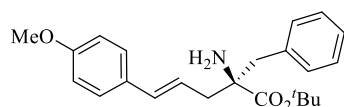

Colorless oil (44.7 mg, 60%);  $R_f = 0.25$  (petroleum ether/ ethyl acetate = 2:1); the enantiomeric excess was determined to be 96% by HPLC analysis on Daicel Chirapak IA-H column (hexane/isopropanol = 90/10, flow rate 0.8

mL/min, T = 30 °C), UV 254 nm,  $t_R(\text{major})$  10.997 min,  $t_R(\text{minor})$  8.128 min;  $[\alpha]_D^{20} = +9.49$  ( $c = 0.69$ ,  $\text{CHCl}_3$ );  $^1\text{H NMR}$  (600 MHz,  $\text{CDCl}_3$ )  $\delta$  7.29 – 7.23 (m, 7H), 6.83 (d,  $J = 12.0$  Hz, 2H), 6.46 (d,  $J = 12.0$  Hz, 1H), 5.97 (ddd,  $J = 15.5, 8.4, 6.8$  Hz, 1H), 3.79 (s, 3H), 3.21 (d,  $J = 12.0$  Hz, 1H), 2.92 – 2.70 (m, 2H), 2.40 (dd,  $J = 12.0, 6.0$  Hz, 1H), 1.63 (s, 2H), 1.46 (s, 9H);  $^{13}\text{C NMR}$  (151 MHz,  $\text{CDCl}_3$ )  $\delta$  175.31, 159.09, 136.56, 133.78, 130.26, 129.97, 128.25, 127.33, 126.89, 121.81, 113.98, 81.43, 62.03, 55.29, 45.75, 44.36, 28.14; **HRMS(ESI)**  $m/z$ :  $[\text{M}+\text{H}]^+$  Calculated for  $\text{C}_{23}\text{H}_{30}\text{NO}_3^+$  368.2220; found 368.2218.

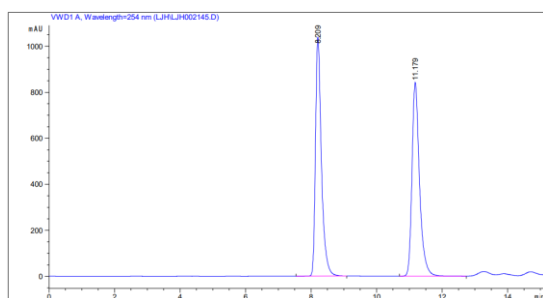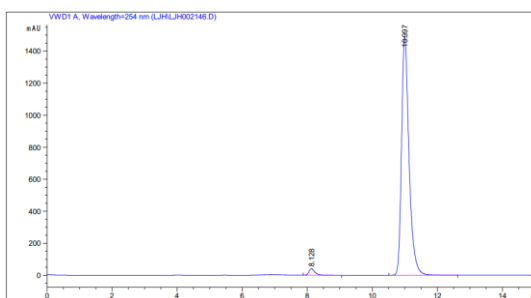

| Peak # | RetTime [min] | Type | Width [min] | Area [mAU*s] | Height [mAU] | Area %  |
|--------|---------------|------|-------------|--------------|--------------|---------|
| 1      | 8.209         | BB   | 0.1889      | 1.30559e4    | 1038.84351   | 49.2939 |
| 2      | 11.179        | BB   | 0.2401      | 1.34300e4    | 841.77106    | 50.7061 |

  

| Peak # | RetTime [min] | Type | Width [min] | Area [mAU*s] | Height [mAU] | Area %  |
|--------|---------------|------|-------------|--------------|--------------|---------|
| 1      | 8.128         | BB   | 0.1908      | 528.64502    | 41.11035     | 2.1668  |
| 2      | 10.997        | BB   | 0.2408      | 2.38684e4    | 1490.17078   | 97.8332 |

***tert*-Butyl (*S,E*)-2-amino-5-(4-methoxyphenyl)-2-(4-methylbenzyl)pent-4-enoate (**5i**):**

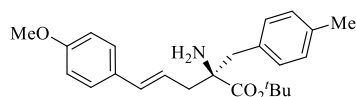

Colorless oil (47.2 mg, 62%);  $R_f = 0.25$  (petroleum ether/ ethyl acetate = 2:1); the enantiomeric excess was determined to be 95%

by HPLC analysis on Daicel Chirapak IA-H column (hexane/isopropanol = 90/10, flow rate 0.8 mL/min, T = 30 °C), UV 254 nm,  $t_R(\text{major})$  9.653 min,  $t_R(\text{minor})$  8.040 min;  $[\alpha]_D^{20} = +9.64$  ( $c = 0.57$ ,  $\text{CHCl}_3$ );  $^1\text{H NMR}$  (600 MHz,  $\text{CDCl}_3$ )  $\delta$  7.25 (d,  $J = 6.0$  Hz, 2H), 7.12 (d,  $J = 12.0$  Hz, 2H), 7.08 (d,  $J = 6.0$  Hz, 2H), 6.83 (d,  $J = 6.0$  Hz, 2H), 6.45 (d,  $J = 12.0$  Hz, 1H), 5.97 (ddd,  $J = 15.5, 8.3, 6.9$  Hz, 1H), 3.79 (s, 3H), 3.17 (d,  $J = 12.0$  Hz, 1H), 2.79 (dd,  $J = 12.0, 6.0$  Hz, 1H), 2.75 (d,  $J = 12.0$  Hz, 1H), 2.40 – 2.37 (m, 1H), 2.31 (s, 3H), 1.64 (s, 2H), 1.47 (s, 9H);  $^{13}\text{C NMR}$  (151 MHz,  $\text{CDCl}_3$ )  $\delta$  175.41, 159.08, 136.40, 133.69, 133.38, 130.10, 130.01, 128.96, 127.32, 121.92, 113.98, 81.36, 62.04, 55.29, 45.28, 44.34, 28.16, 21.04; **HRMS(ESI)**  $m/z$ :  $[\text{M}+\text{H}]^+$  Calculated for  $\text{C}_{24}\text{H}_{32}\text{NO}_3^+$  382.2377; found 382.2377.

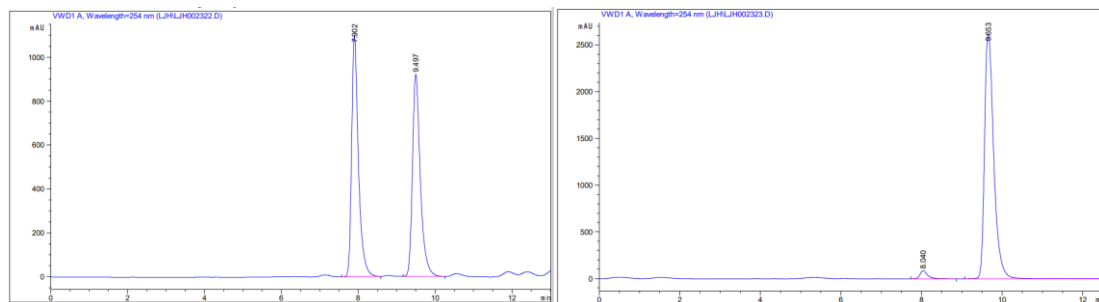

| Peak # | RetTime [min] | Type | Width [min] | Area [mAU*s] | Height [mAU] | Area %  | Peak # | RetTime [min] | Type | Width [min] | Area [mAU*s] | Height [mAU] | Area %  |
|--------|---------------|------|-------------|--------------|--------------|---------|--------|---------------|------|-------------|--------------|--------------|---------|
| 1      | 7.902         | BB   | 0.1823      | 1.34223e4    | 1095.83569   | 50.7613 | 1      | 8.040         | BB   | 0.1903      | 1091.96704   | 86.04393     | 2.5645  |
| 2      | 9.497         | BB   | 0.2131      | 1.30197e4    | 920.33545    | 49.2387 | 2      | 9.653         | BBA  | 0.2422      | 4.14877e4    | 2611.04785   | 97.4355 |

**tert-Butyl (*S,E*)-2-amino-2-(4-fluorobenzyl)-5-(4-methoxyphenyl)pent-4-enoate (5j):**

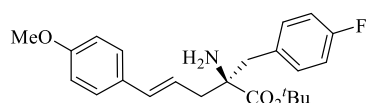

Colorless oil (43.9 mg, 57%);  $R_f = 0.23$  (petroleum ether/ ethyl acetate = 2:1); the enantiomeric excess was determined to be 96%

by HPLC analysis on Daicel Chirapak IA-H column (hexane/isopropanol = 80/20, flow rate 0.8 mL/min,  $T = 30\text{ }^\circ\text{C}$ ), UV 254 nm,  $t_R(\text{major})$  8.403 min,  $t_R(\text{minor})$  6.943 min;  $[\alpha]_D^{20} = +12.71$  ( $c = 0.44$ ,  $\text{CHCl}_3$ );  $^1\text{H NMR}$  (600 MHz,  $\text{CDCl}_3$ )  $\delta$  7.26 (d,  $J = 6.0$  Hz, 2H), 7.21 (dd,  $J = 12.0, 6.0$  Hz, 2H), 6.97 (t,  $J = 8.6$  Hz, 2H), 6.83 (d,  $J = 8.6$  Hz, 2H), 6.45 (d,  $J = 18.0$  Hz, 1H), 5.98 – 5.93 (m, 1H), 3.79 (s, 3H), 3.17 (d,  $J = 18.0$  Hz, 1H), 2.81 - 2.75 (m, 2H), 2.38 (dd,  $J = 12.0, 6.0$  Hz, 1H), 1.65 (s, 2H), 1.45 (s, 9H);  $^{13}\text{C NMR}$  (151 MHz,  $\text{CDCl}_3$ )  $\delta$  175.17, 162.82, 161.20, 159.15, 133.93 (d,  $J = 252.2$  Hz), 131.71 (d,  $J = 7.6$  Hz), 129.88, 127.34, 121.58, 115.11, 114.97 (d,  $J = 146.5$  Hz), 81.57, 62.01, 55.29, 44.87, 44.19, 28.13; **HRMS(ESI)**  $m/z$ :  $[\text{M}+\text{H}]^+$  Calculated for  $\text{C}_{23}\text{H}_{29}\text{FNO}_3^+$  386.2126; found 386.2129.

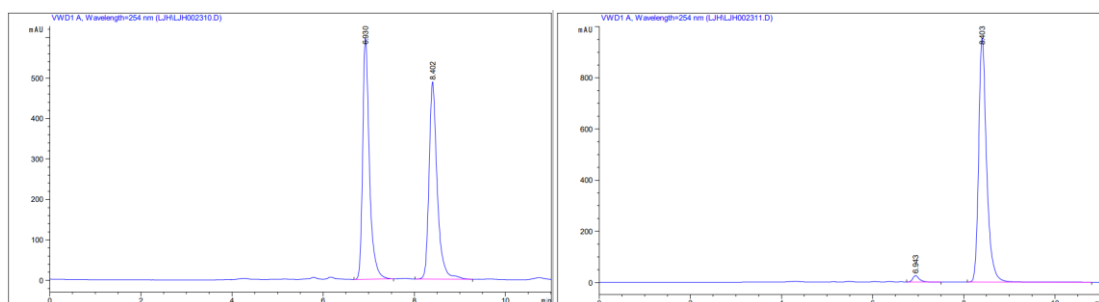

| Peak # | RetTime [min] | Type | Width [min] | Area [mAU*s] | Height [mAU] | Area %  | Peak # | RetTime [min] | Type | Width [min] | Area [mAU*s] | Height [mAU] | Area %  |
|--------|---------------|------|-------------|--------------|--------------|---------|--------|---------------|------|-------------|--------------|--------------|---------|
| 1      | 6.930         | BB   | 0.1533      | 6118.66504   | 595.90686    | 50.1918 | 1      | 6.943         | BB   | 0.1548      | 256.38004    | 24.95638     | 2.1705  |
| 2      | 8.402         | BB   | 0.1862      | 6071.90137   | 487.38828    | 49.8082 | 2      | 8.403         | BB   | 0.1837      | 1.15554e4    | 952.96722    | 97.8295 |

***tert*-Butyl (*S,E*)-2-amino-5-(4-methoxyphenyl)-2-(naphthalen-2-ylmethyl)pent-4-enoate (**5k**):**

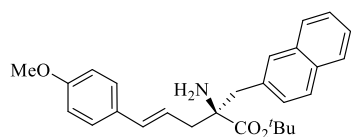

White solid (45.9 mg, 55%); m.p. = 100-101 °C;  $R_f$  = 0.26

(petroleum ether/ ethyl acetate = 2:1); the enantiomeric excess was

determined to be 95% by HPLC analysis on Daicel Chirapak IA-

H column (hexane/isopropanol = 90/10, flow rate 0.8 mL/min, T = 30 °C), UV 254 nm,  $t_R$ (major)

13.663 min,  $t_R$ (minor) 17.602 min;  $[\alpha]_D^{20}$  = -10.78 ( $c$  = 0.58,  $\text{CHCl}_3$ );  **$^1\text{H}$  NMR (600 MHz,  $\text{CDCl}_3$ )**

$\delta$  7.81 – 7.71 (m, 4H), 7.46 – 7.37 (m, 3H), 7.26 (d,  $J$  = 6.0 Hz, 2H), 6.83 (d,  $J$  = 12.0 Hz, 2H), 6.48 (d,

$J$  = 18.0 Hz, 1H), 6.00 (ddd,  $J$  = 15.4, 8.4, 6.8 Hz, 1H), 3.78 (s, 3H), 3.39 (d,  $J$  = 12.0 Hz, 1H), 2.95 (d,

$J$  = 18.0 Hz, 1H), 2.88 – 2.85 (m, 1H), 2.45 (dd,  $J$  = 12.0, 6.0 Hz, 1H), 1.64 (s, 2H), 1.47 (s, 9H);  **$^{13}\text{C}$**

**NMR (151 MHz,  $\text{CDCl}_3$ )**  $\delta$  175.37, 159.13, 134.21, 133.87, 133.37, 132.49, 129.96, 128.92, 128.58,

127.78, 127.63, 127.36, 126.02, 125.59, 121.77, 114.01, 81.51, 62.27, 55.30, 45.86, 44.52, 28.18;

**HRMS(ESI)**  $m/z$ :  $[\text{M}+\text{H}]^+$  Calculated for  $\text{C}_{27}\text{H}_{32}\text{NO}_3^+$  418.2377; found 418.2376.

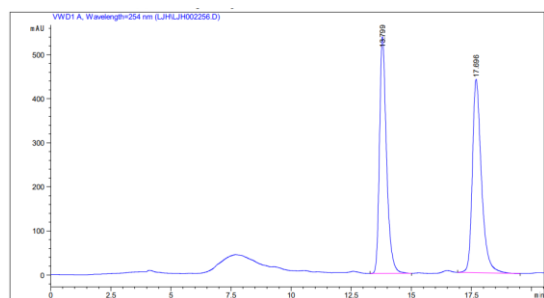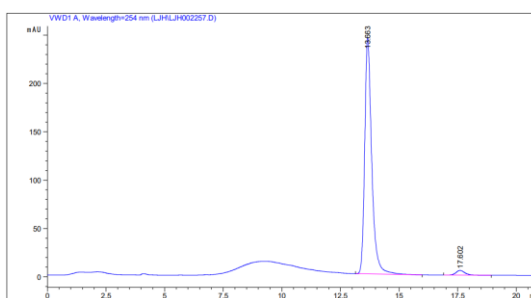

| Peak # | RetTime [min] | Type | Width [min] | Area [mAU*s] | Height [mAU] | Area %  | Peak # | RetTime [min] | Type | Width [min] | Area [mAU*s] | Height [mAU] | Area %  |
|--------|---------------|------|-------------|--------------|--------------|---------|--------|---------------|------|-------------|--------------|--------------|---------|
| 1      | 13.799        | BB   | 0.3058      | 1.09267e4    | 537.21375    | 48.6164 | 1      | 13.663        | BB   | 0.3139      | 5105.08887   | 244.17932    | 97.4970 |
| 2      | 17.696        | BB   | 0.3942      | 1.15486e4    | 439.26151    | 51.3836 | 2      | 17.602        | BB   | 0.3974      | 131.06105    | 4.93404      | 2.5030  |

***tert*-Butyl (*R,E*)-2-amino-2-phenethyl-5-phenylpent-4-enoate (**5l**):**

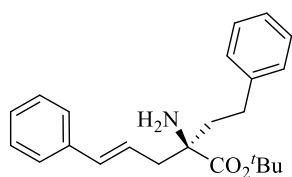

Colorless oil (44.2 mg, 57%);  $R_f$  = 0.23 (petroleum ether/ ethyl acetate

= 5:1); the enantiomeric excess was determined to be 93% by HPLC

analysis on Daicel Chirapak IA-H column (hexane/isopropanol =

90/10, flow rate 0.8 mL/min, T = 30 °C), UV 254 nm,  $t_R$ (major) 9.695 min,  $t_R$ (minor) 7.830 min;

$[\alpha]_D^{20}$  = +9.25 ( $c$  = 0.33,  $\text{CHCl}_3$ );  **$^1\text{H}$  NMR (600 MHz,  $\text{CDCl}_3$ )**  $\delta$  7.33 – 7.27 (m, 6H), 7.23 – 7.18 (m,

4H), 6.50 (d,  $J$  = 18.0 Hz, 1H), 6.22 – 6.04 (m, 1H), 2.75 - 2.69 (m, 2H), 2.54 – 2.49 (m, 1H), 2.43 (dd,

$J$  = 12.0, 6.0 Hz, 1H), 2.08 (td,  $J$  = 13.1, 4.3 Hz, 1H), 1.87 (td,  $J$  = 13.1, 5.2 Hz, 1H), 1.74 (s, 2H), 1.52

(s, 9H);  **$^{13}\text{C}$  NMR (151 MHz,  $\text{CDCl}_3$ )**  $\delta$  175.68, 141.87, 137.09, 134.34, 128.56, 128.51, 128.36,

127.42, 126.21, 125.98, 124.23, 81.33, 61.27, 43.81, 42.27, 30.61, 28.18; **HRMS(ESI)**  $m/z$ :  $[\text{M}+\text{H}]^+$

Calculated for C<sub>23</sub>H<sub>30</sub>NO<sub>2</sub><sup>+</sup> 352.2271; found 352.2268.

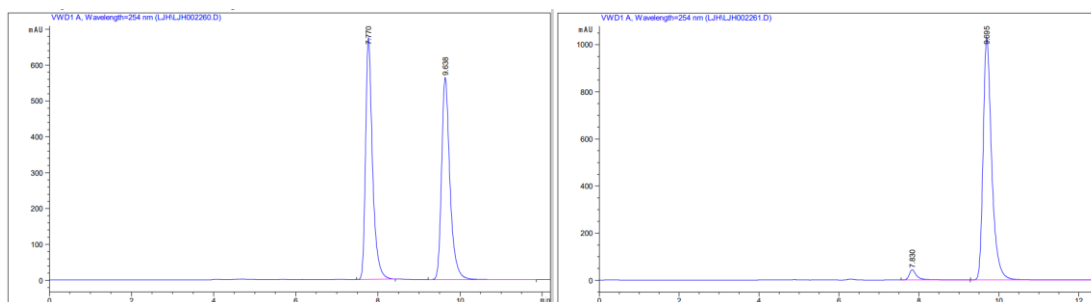

| Peak # | RetTime [min] | Type | Width [min] | Area [mAU*s] | Height [mAU] | Area %  | Peak # | RetTime [min] | Type | Width [min] | Area [mAU*s] | Height [mAU] | Area %  |
|--------|---------------|------|-------------|--------------|--------------|---------|--------|---------------|------|-------------|--------------|--------------|---------|
| 1      | 7.770         | BB   | 0.1750      | 7909.64551   | 673.00439    | 49.7574 | 1      | 7.830         | BB   | 0.1938      | 576.13379    | 43.52164     | 3.6086  |
| 2      | 9.638         | BB   | 0.2134      | 7986.78662   | 563.59399    | 50.2426 | 2      | 9.695         | BBA  | 0.2258      | 1.53892e4    | 1027.03503   | 96.3914 |

***tert*-Butyl (*S,E*)-2-amino-2-(*tert*-butoxymethyl)-5-(4-methoxyphenyl)pen (5m):**

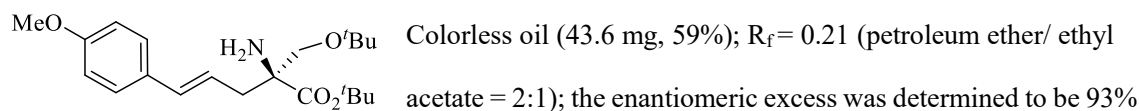

by HPLC analysis on Daicel Chirapak IA-H column (hexane/isopropanol = 90/10, flow rate 0.8 mL/min, T = 30 °C), UV 254 nm, t<sub>R</sub>(major) 7.878 min, t<sub>R</sub>(minor) 6.212 min; [α]<sub>D</sub><sup>20</sup> = +12.52 (c = 0.65, CHCl<sub>3</sub>); <sup>1</sup>H NMR (600 MHz, CDCl<sub>3</sub>) δ 7.26 (d, J = 6.0 Hz, 2H), 6.83 (d, J = 12.0 Hz, 2H), 6.42 (d, J = 18.0 Hz, 1H), 5.98 – 5.93 (m, 1H), 3.79 (s, 3H), 3.65 (d, J = 6.0 Hz, 1H), 3.28 (d, J = 6.0 Hz, 1H), 2.56 (dd, J = 12.0, 6.0 Hz, 1H), 2.31 (dd, J = 12.0, 6.0 Hz, 1H), 1.93 (s, 2H), 1.47 (s, 9H), 1.16 (s, 9H); <sup>13</sup>C NMR (151 MHz, CDCl<sub>3</sub>) δ 174.89, 159.01, 133.32, 130.06, 127.31, 121.50, 113.93, 80.75, 72.74, 67.95, 61.97, 55.27, 40.29, 28.10, 27.45; HRMS(ESI) m/z: [M+H]<sup>+</sup> Calculated for C<sub>21</sub>H<sub>34</sub>NO<sub>4</sub><sup>+</sup> 364.2482; found 364.2482.

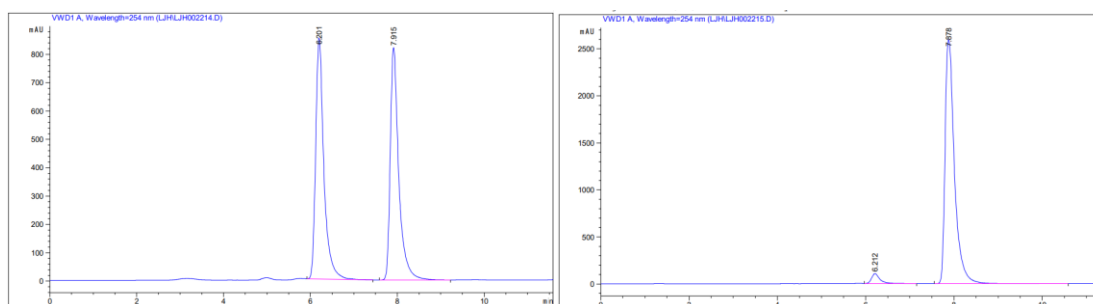

| Peak # | RetTime [min] | Type | Width [min] | Area [mAU*s] | Height [mAU] | Area %  | Peak # | RetTime [min] | Type | Width [min] | Area [mAU*s] | Height [mAU] | Area %  |
|--------|---------------|------|-------------|--------------|--------------|---------|--------|---------------|------|-------------|--------------|--------------|---------|
| 1      | 6.201         | BB   | 0.1957      | 1.11737e4    | 849.84833    | 50.1954 | 1      | 6.212         | BB   | 0.1957      | 1402.06152   | 105.58316    | 3.5428  |
| 2      | 7.915         | BB   | 0.2015      | 1.10867e4    | 819.62274    | 49.8046 | 2      | 7.878         | BB   | 0.2228      | 3.81729e4    | 2593.00684   | 96.4572 |

***di-tert*-Butyl (*S,E*)-2-amino-2-(3-(4-methoxyphenyl)allyl)succinate (5n):**

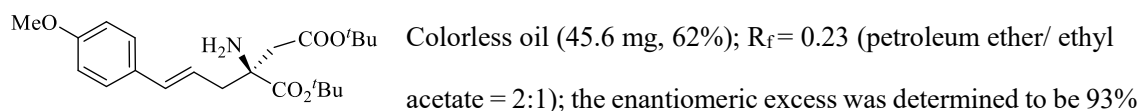

by HPLC analysis on Daicel Chirapak IA-H column (hexane/isopropanol = 90/10, flow rate 0.8 mL/min, T = 30 °C), UV 254 nm,  $t_R$ (major) 8.015 min,  $t_R$ (minor) 6.315 min;  $[\alpha]_D^{20} = +7.54$  ( $c = 0.42$ ,  $\text{CHCl}_3$ );  $^1\text{H NMR}$  (600 MHz,  $\text{CDCl}_3$ )  $\delta$  7.26 (d,  $J = 6.0$  Hz, 2H), 6.83 (d,  $J = 12.0$  Hz, 2H), 6.42 (d,  $J = 18.0$  Hz, 1H), 5.98 - 5.93 (m, 1H), 3.80 (s, 3H), 3.64 (d,  $J = 6.0$  Hz, 1H), 3.28 (d,  $J = 6.0$  Hz, 1H), 2.56 (dd,  $J = 18.0, 6.0$  Hz, 1H), 2.31 (dd,  $J = 12.0, 6.0$  Hz, 1H), 1.93 (s, 2H), 1.47 (s, 9H), 1.16 (s, 9H);  $^{13}\text{C NMR}$  (151 MHz,  $\text{CDCl}_3$ )  $\delta$  174.90, 159.01, 133.32, 130.07, 127.32, 121.51, 113.93, 80.76, 72.75, 67.96, 61.98, 55.28, 40.30, 28.10, 27.46; **HRMS(ESI) m/z:  $[\text{M}+\text{H}]^+$  Calculated for  $\text{C}_{22}\text{H}_{34}\text{NO}_5^+$  364.2482; found 364.2482.**

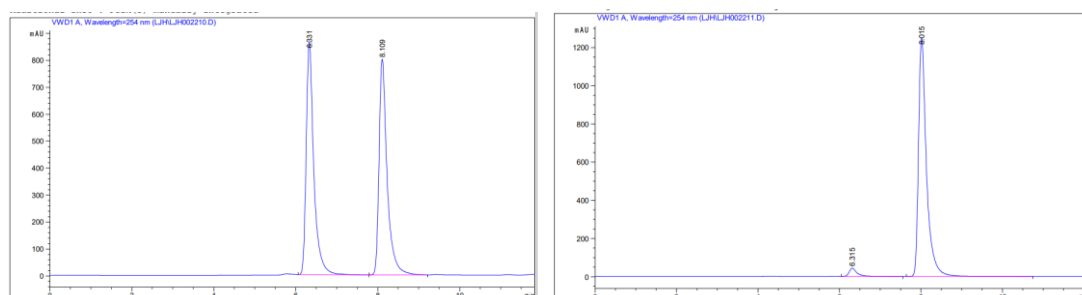

| Peak # | RetTime [min] | Type | Width [min] | Area [mAU*s] | Height [mAU] | Area %  |
|--------|---------------|------|-------------|--------------|--------------|---------|
| 1      | 6.331         | BB   | 0.1913      | 1.11408e4    | 863.54626    | 50.4213 |
| 2      | 8.109         | BB   | 0.2035      | 1.09546e4    | 800.10468    | 49.5787 |

  

| Peak # | RetTime [min] | Type | Width [min] | Area [mAU*s] | Height [mAU] | Area %  |
|--------|---------------|------|-------------|--------------|--------------|---------|
| 1      | 6.315         | BB   | 0.1948      | 569.22485    | 42.73330     | 3.2579  |
| 2      | 8.015         | BB   | 0.2018      | 1.69028e4    | 1247.39673   | 96.7421 |

***di-tert-Butyl (R,E)-2-amino-2-(3-(4-methoxyphenyl)allyl)pentanedioate (5o):***

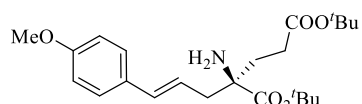

Colorless oil (42.1 mg, 52%);  $R_f = 0.24$  (petroleum ether/ ethyl acetate = 2:1); the enantiomeric excess was determined to be 94%

by HPLC analysis on Daicel Chirapak IA-H column (hexane/isopropanol = 90/10, flow rate 0.8 mL/min, T = 30 °C), UV 254 nm,  $t_R$ (major) 10.869 min,  $t_R$ (minor) 9.194 min;  $[\alpha]_D^{20} = +9.44$  ( $c = 0.82$ ,  $\text{CHCl}_3$ );  $^1\text{H NMR}$  (600 MHz,  $\text{CDCl}_3$ )  $\delta$  7.25 (d,  $J = 12.0$  Hz, 2H), 6.83 (d,  $J = 12.0$  Hz, 2H), 6.42 (d,  $J = 18.0$  Hz, 1H), 5.95 (ddd,  $J = 15.3, 8.2, 6.9$  Hz, 1H), 3.79 (s, 3H), 2.64 (dd,  $J = 12.0, 6.0$  Hz, 1H), 2.39 - 2.33 (m, 2H), 2.22 - 2.17 (m, 1H), 2.07 - 2.02 (m, 1H), 1.89 - 1.84 (m, 1H), 1.62 (s, 2H), 1.48 (s, 9H), 1.44 (s, 9H);  $^{13}\text{C NMR}$  (151 MHz,  $\text{CDCl}_3$ )  $\delta$  175.33, 172.73, 159.09, 133.76, 129.90, 127.32, 121.78, 113.96, 81.34, 80.31, 60.66, 55.27, 43.49, 34.82, 30.42, 28.10, 28.07; **HRMS(ESI) m/z:  $[\text{M}+\text{H}]^+$  Calculated for  $\text{C}_{23}\text{H}_{36}\text{NO}_5^+$  406.2588; found 406.2586.**

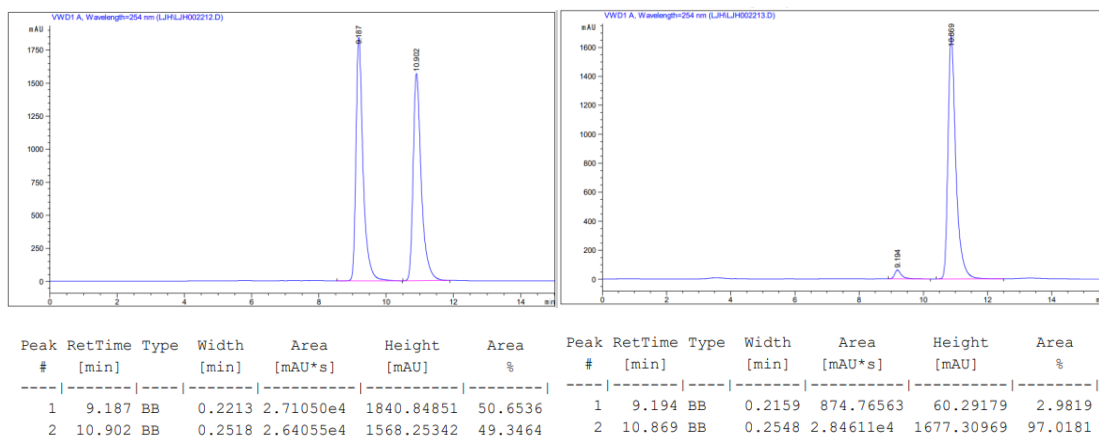

#### 4. Determination of the absolute configuration of **4b**

The absolute configuration of compound **4b** was established by comparing its optical rotation value with the literature data:

| ( <i>R</i> )-product ( <b>4b</b> ) in this work                              | ( <i>S</i> )-product in literature <sup>[5]</sup>                            |
|------------------------------------------------------------------------------|------------------------------------------------------------------------------|
| <p><i>tert</i>-butyl (<i>R,E</i>)-2-amino-2-methyl-5-phenylpent-4-enoate</p> | <p><i>tert</i>-butyl (<i>S,E</i>)-2-amino-2-methyl-5-phenylpent-4-enoate</p> |
| $[\alpha]_{\text{D}}^{20} = +16.25$ ( $c = 0.90$ , $\text{CHCl}_3$ )         | $[\alpha]_{\text{D}}^{20} = -7.4$ ( $c = 1.00$ , $\text{CHCl}_3$ )           |

#### Literature:

<sup>1</sup>H NMR (400 MHz, CDCl<sub>3</sub>)  $\delta$  = 7.35 -7.26 (m, 4H), 7.24 -7.18 (m, 1H), 6.48 (d,  $J = 15.8$  Hz, 1H), 6.23 - 5.96 (m, 1H), 2.65 (ddd,  $J = 13.5, 6.8, 1.4$  Hz, 1H), 2.38 (ddd,  $J = 13.5, 8.3, 1.1$  Hz, 1H), 1.82 (s, 2H), 1.47 (s, 9H), 1.34 (s, 3H).

#### This work:

<sup>1</sup>H NMR (600 MHz, CDCl<sub>3</sub>)  $\delta$  7.36-7.29 (m, 4H), 7.25-7.22 (m, 1H), 6.50 (d,  $J = 18.0$  Hz, 1H), 6.25 - 5.93 (m, 1H), 2.67 (dd,  $J = 18.0, 6.0$  Hz, 1H), 2.42 (dd,  $J = 12.0, 6.0$  Hz, 1H), 1.79 (s, 2H), 1.50 (s, 9H), 1.36 (s, 3H).



## 5. Mechanistic Studies

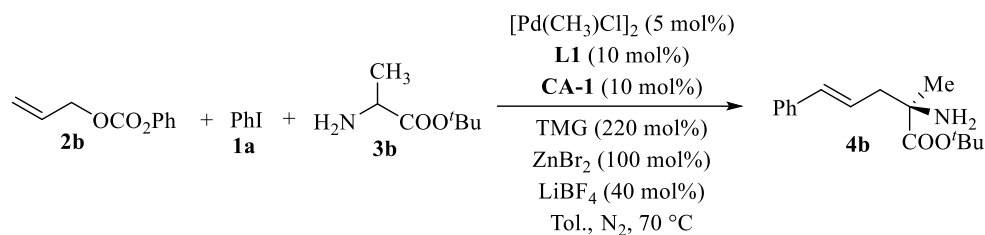

To a 10 mL vial charged with  $[\text{Pd}(\text{C}_3\text{H}_5)\text{Cl}]_2$  (3.6 mg, 0.01 mmol) and **L1** (11.7 mg, 0.02 mmol) was added 0.5 mL toluene, and the mixture was stirred under nitrogen atmosphere at room temperature for 30 min. Then, **1a** (0.2 mmol), **2b** (0.36 mmol), **3b** (0.3 mmol), chiral aldehyde **CA-1** (7.7 mg, 0.02 mmol),  $\text{ZnBr}_2$  (45.0 mg, 0.2 mmol),  $\text{LiBF}_4$  (7.5 mg, 0.08 mmol) and TMG (56.2  $\mu\text{L}$ , 0.44 mmol) were added. The mixture was continuously stirred at indicated reaction temperature under nitrogen atmosphere. After the reaction completed, the solvent was removed by rotary evaporation, and the residue was purified by flash chromatography column on silica gel (eluent: petroleum ether/ ethyl acetate/ triethylamine =200/100/3). The reaction yielded **4b** in 81% yield and 96% ee.

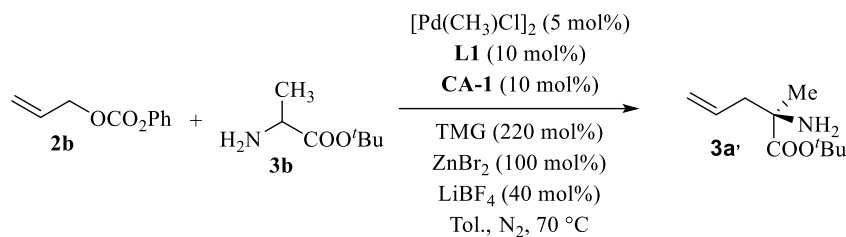

To a 10 mL vial charged with  $[\text{Pd}(\text{C}_3\text{H}_5)\text{Cl}]_2$  (3.6 mg, 0.01 mmol) and **L1** (11.7 mg, 0.02 mmol) was added 0.5 mL toluene, and the mixture was stirred under nitrogen atmosphere at room temperature for 30 min. Then, **2b** (0.36 mmol), **3b** (0.3 mmol), chiral aldehyde **CA-1** (7.7 mg, 0.02 mmol),  $\text{ZnBr}_2$  (45.0 mg, 0.2 mmol),  $\text{LiBF}_4$  (7.5 mg, 0.08 mmol) and TMG (56.2  $\mu\text{L}$ , 0.44 mmol) were added. The mixture was continuously stirred at indicated reaction temperature under nitrogen atmosphere. After the reaction completed, the solvent was removed by rotary evaporation, and the residue was purified by flash chromatography column on silica gel (eluent: petroleum ether/ ethyl acetate/ triethylamine =300/100/3). The reaction yielded **3a'** in 79% yield and 97% ee.

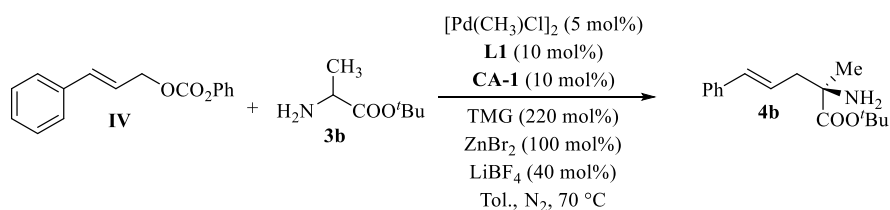

To a 10 mL vial charged with  $[\text{Pd}(\text{C}_3\text{H}_5)\text{Cl}]_2$  (3.6 mg, 0.01 mmol) and **L1** (11.7 mg, 0.02 mmol) was added 0.5 mL toluene, and the mixture was stirred under nitrogen atmosphere at room temperature for 30 min. Then, **IV** (0.2 mmol), **3b** (0.3 mmol), chiral aldehyde **CA-1** (7.7 mg, 0.02 mmol),  $\text{ZnBr}_2$  (45.0 mg, 0.2 mmol),  $\text{LiBF}_4$  (7.5mg, 0.08 mmol) and TMG (56.2 uL, 0.44 mmol) were added. The mixture was continuously stirred at indicated reaction temperature under nitrogen atmosphere. After the reaction completed, the solvent was removed by rotary evaporation, and the residue was purified by flash chromatography column on silica gel (eluent: petroleum ether/ ethyl acetate/ triethylamine =200/100/3). The reaction yielded **4b** in 90% yield and 92% ee.

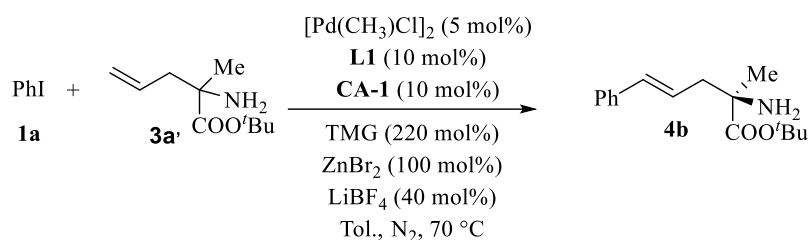

To a 10 mL vial charged with  $[\text{Pd}(\text{C}_3\text{H}_5)\text{Cl}]_2$  (3.6 mg, 0.01 mmol) and **L1** (11.7 mg, 0.02 mmol) was added 0.5 mL toluene, and the mixture was stirred under nitrogen atmosphere at room temperature for 30 min. Then, **1a** (0.2 mmol), **3a'** (0.3 mmol), chiral aldehyde **CA-1** (7.7 mg, 0.02 mmol),  $\text{ZnBr}_2$  (45.0 mg, 0.2 mmol),  $\text{LiBF}_4$  (7.5mg, 0.08 mmol) and TMG (56.2 uL, 0.44 mmol) were added. The mixture was continuously stirred at indicated reaction temperature under nitrogen atmosphere. After the reaction completed, the solvent was removed by rotary evaporation, and the residue was purified by flash chromatography column on silica gel (eluent: petroleum ether/ ethyl acetate/ triethylamine =200/100/3). The reaction yielded **4b** in 65% yield and 96% ee.

LJH-1H  
LJH-240220-1

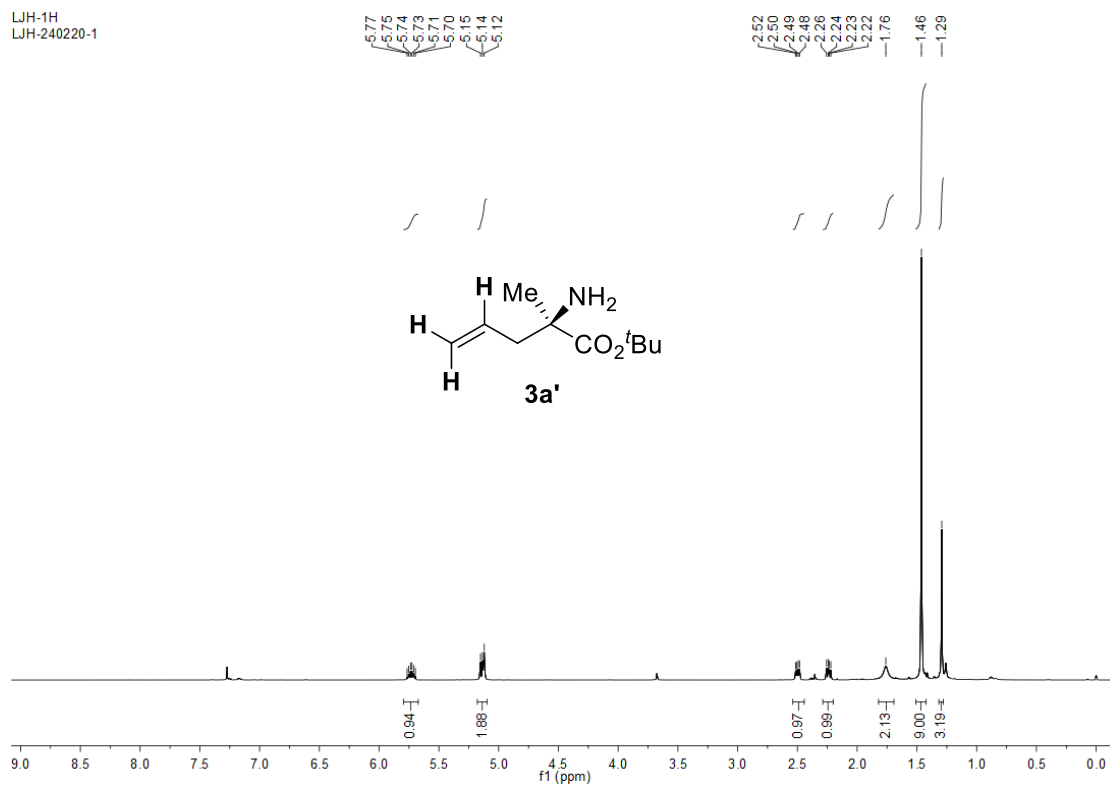

LJH-1H  
LJH-240117-2

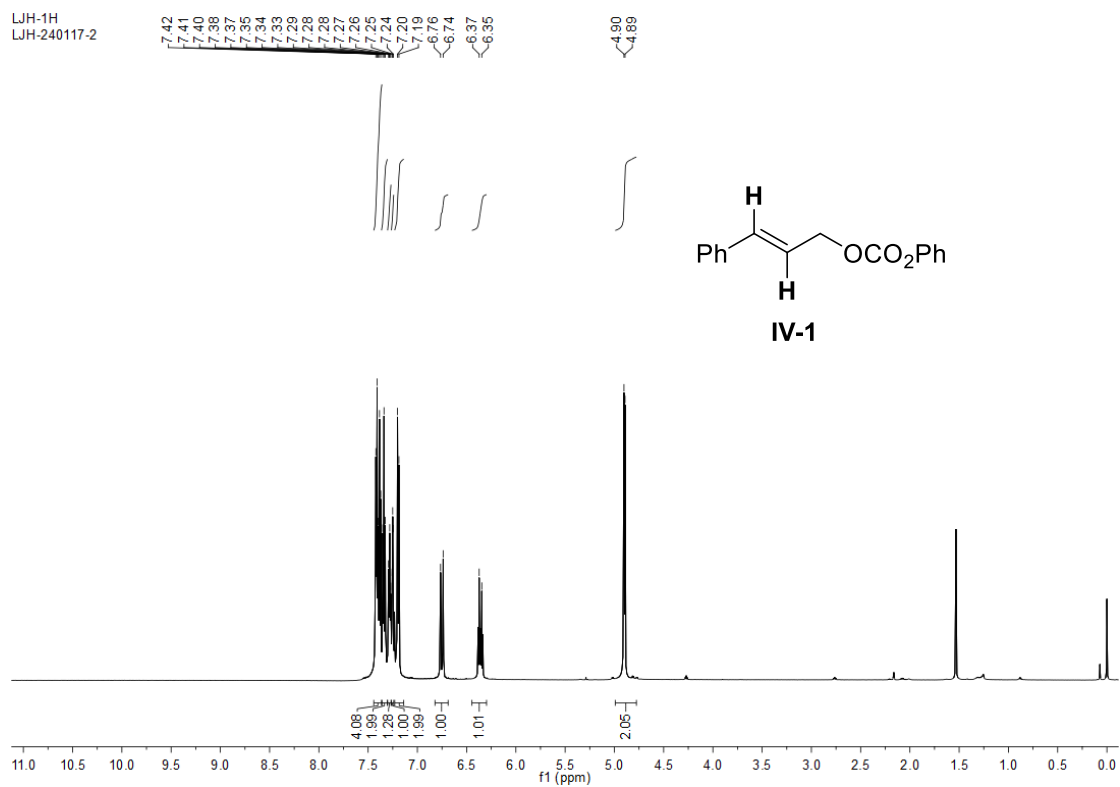

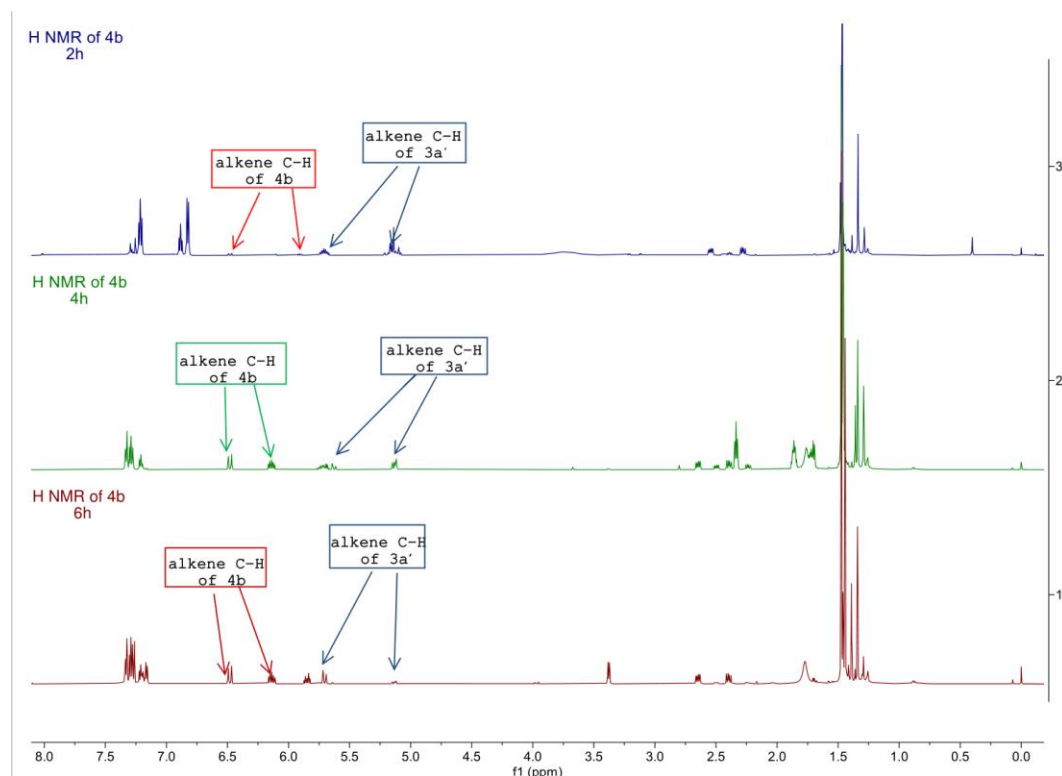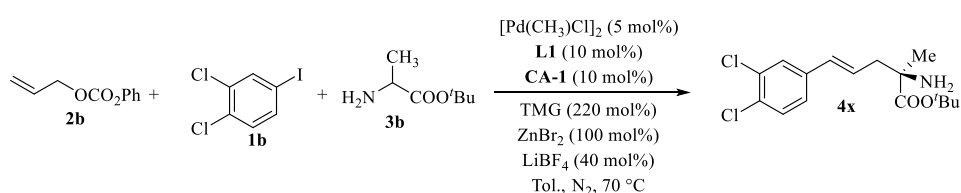

To a 10 mL vial charged with  $[\text{Pd}(\text{C}_3\text{H}_5)\text{Cl}]_2$  (3.6 mg, 0.01 mmol) and **L1** (11.7 mg, 0.02 mmol) was added 0.5 mL toluene, and the mixture was stirred under nitrogen atmosphere at room temperature for 30 min. Then, **1b** (0.2 mmol), **2b** (0.36 mmol), **3b** (0.3 mmol), chiral aldehyde **CA-1** (7.7 mg, 0.02 mmol),  $\text{ZnBr}_2$  (45.0 mg, 0.2 mmol),  $\text{LiBF}_4$  (7.5 mg, 0.08 mmol) and TMG (56.2  $\mu\text{L}$ , 0.44 mmol) were added. The mixture was continuously stirred at indicated reaction temperature under nitrogen atmosphere. After the reaction completed, the solvent was removed by rotary evaporation, and the residue was purified by flash chromatography column on silica gel (eluent: petroleum ether/ ethyl acetate/ triethylamine =200/100/3). The reaction yielded **4x** in 56% yield and 88% ee.

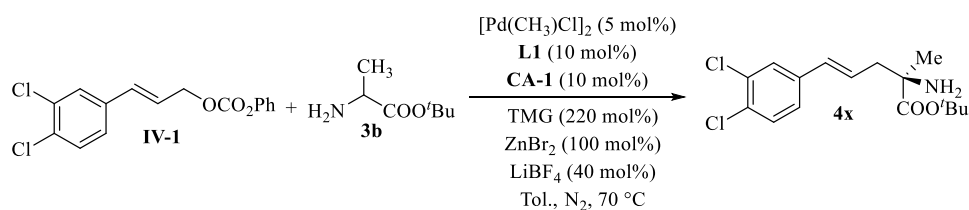

To a 10 mL vial charged with  $[\text{Pd}(\text{C}_3\text{H}_5)\text{Cl}]_2$  (3.6 mg, 0.01 mmol) and **L1** (11.7 mg, 0.02 mmol) was added 0.5 mL toluene, and the mixture was stirred under nitrogen atmosphere at room temperature for 30 min. Then, **IV-1** (0.2 mmol), **3b** (0.3 mmol), chiral aldehyde **CA-1** (7.7 mg, 0.02 mmol),  $\text{ZnBr}_2$  (45.0 mg, 0.2 mmol),  $\text{LiBF}_4$  (7.5mg, 0.08 mmol) and TMG (56.2 uL, 0.44 mmol) were added. The mixture was continuously stirred at indicated reaction temperature under nitrogen atmosphere. After the reaction completed, the solvent was removed by rotary evaporation, and the residue was purified by flash chromatography column on silica gel (eluent: petroleum ether/ ethyl acetate/ triethylamine =200/100/3). The reaction yielded **4x** in 83% yield and 89% ee.

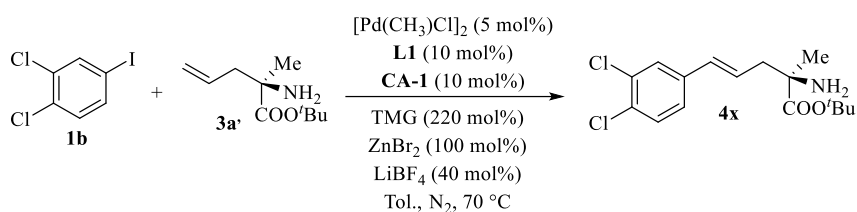

To a 10 mL vial charged with  $[\text{Pd}(\text{C}_3\text{H}_5)\text{Cl}]_2$  (3.6 mg, 0.01 mmol) and **L1** (11.7 mg, 0.02 mmol) was added 0.5 mL toluene, and the mixture was stirred under nitrogen atmosphere at room temperature for 30 min. Then, **1a** (0.2 mmol), **3a'** (0.3 mmol), chiral aldehyde **CA-1** (7.7 mg, 0.02 mmol),  $\text{ZnBr}_2$  (45.0 mg, 0.2 mmol),  $\text{LiBF}_4$  (7.5mg, 0.08 mmol) and TMG (56.2 uL, 0.44 mmol) were added. The mixture was continuously stirred at indicated reaction temperature under nitrogen atmosphere. After the reaction completed, the solvent was removed by rotary evaporation, and the residue was purified by flash chromatography column on silica gel (eluent: petroleum ether/ ethyl acetate/ triethylamine =200/100/3). No desired product **4x** was generated in this reaction.

LJH-1H  
LJH-240129-2

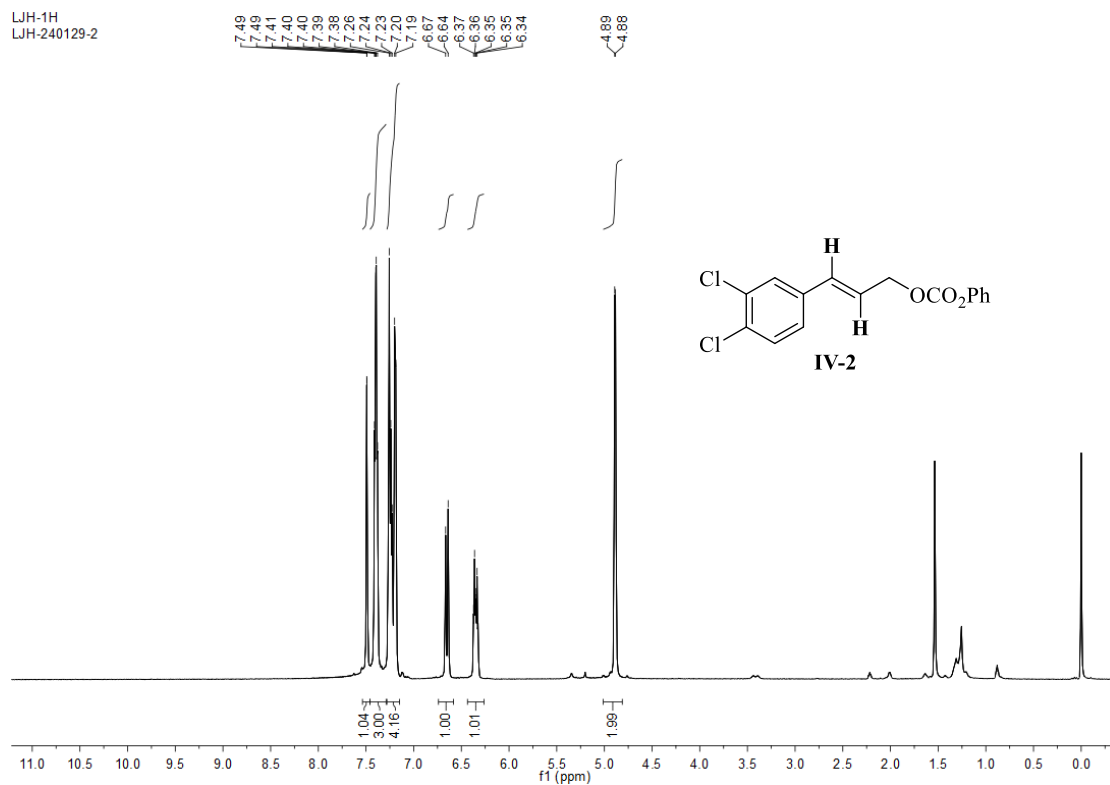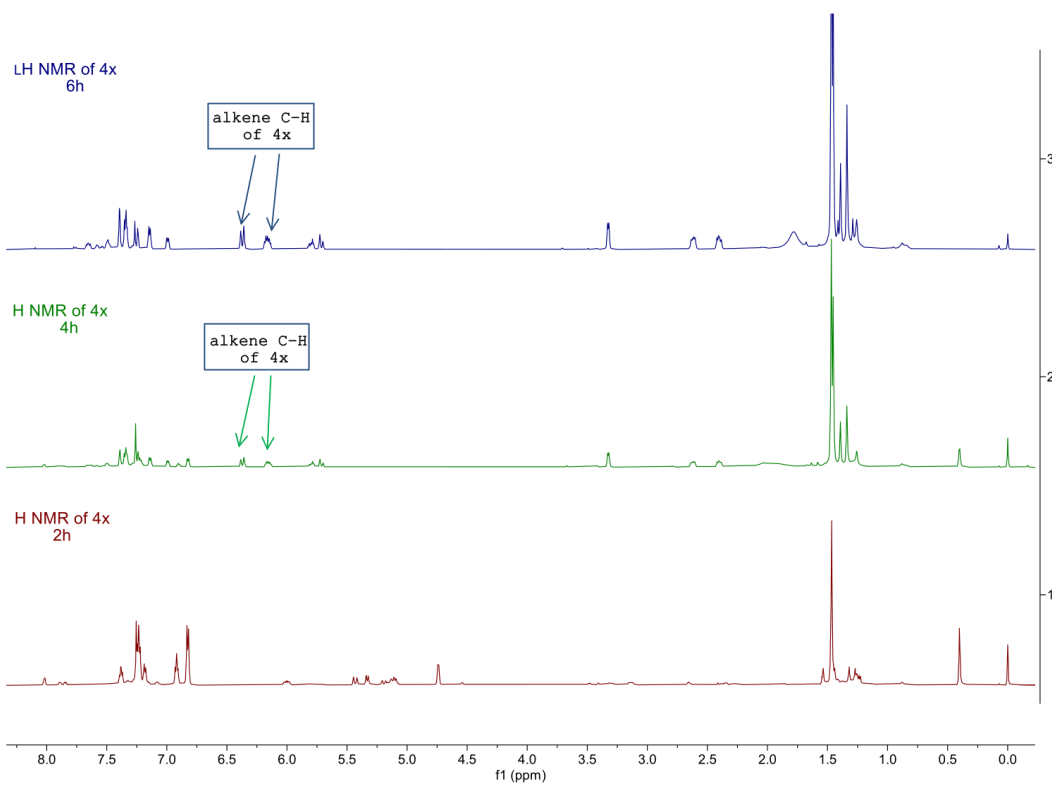

## 6. References

- [1] a) Urvashi, S. Mishra, N. T. Patil, Gold-catalyzed alkenylation and arylation of phosphorothioates. *Chem. Sci.* **2023**, *14*, 13134. b) J. A. Cadge, H. A. Sparkes, J. F. Bower, C. A. Russell, *Angew. Chem. Int. Ed.* **2020**, *59*, 6617–6621.
- [2] O. I. Shmatova, N. E. Shevchenko, E. S. Balenkova, G.-V. Rösenthaller, V. G. Nenajdenko, Friedel-Crafts alkylation of natural amino acid-derived pyrroles with CF<sub>3</sub>-substituted cyclic imines. *Mendeleev Commun.* **2013**, *23*, 92-93.
- [3] K. Manna, H. M. Begam, K. Samanta, R. Jana, Overcoming the deallylation problem: palladium(II)-catalyzed chemo-, regio-, and stereoselective allylic oxidation of aryl allyl ether, amine, and amino acids. *Org. Lett.* **2020**, *22*, 7443-7449.
- [4] B. Xu, et al. Catalytic asymmetric direct  $\alpha$ -alkylation of amino esters by aldehydes via imine activation. *Chem. Sci.* **2014**, *5*, 1988-1991.
- [5] X.-H. Huo, R. He, J. -K. Fu, J.-C. Zhang, G.-Q. Yang, W.-B. Zhang, Stereoselective and Site-Specific Allylic Alkylation of Amino Acids and Small Peptides via a Pd/Cu Dual Catalysis. *J. Am. Chem. Soc.* **2017**, *139*, 9819–9822.

## 7. Copies of $^1\text{H}$ NMR and $^{13}\text{C}$ NMR spectra

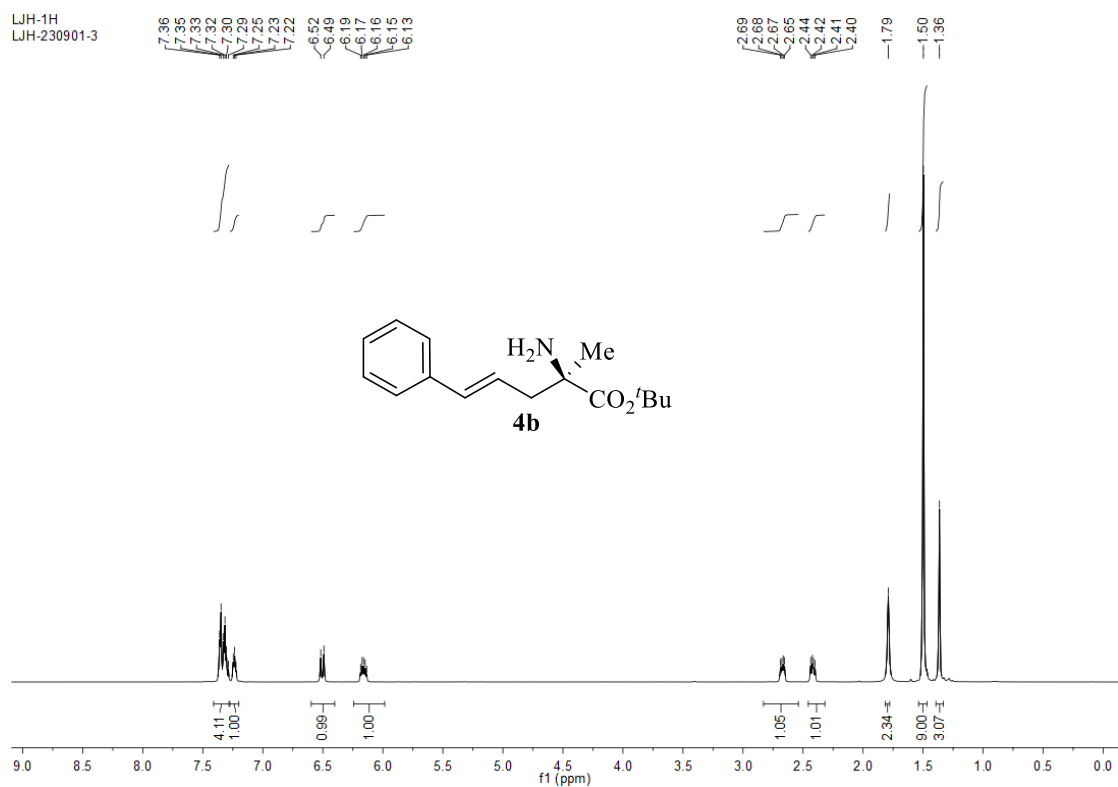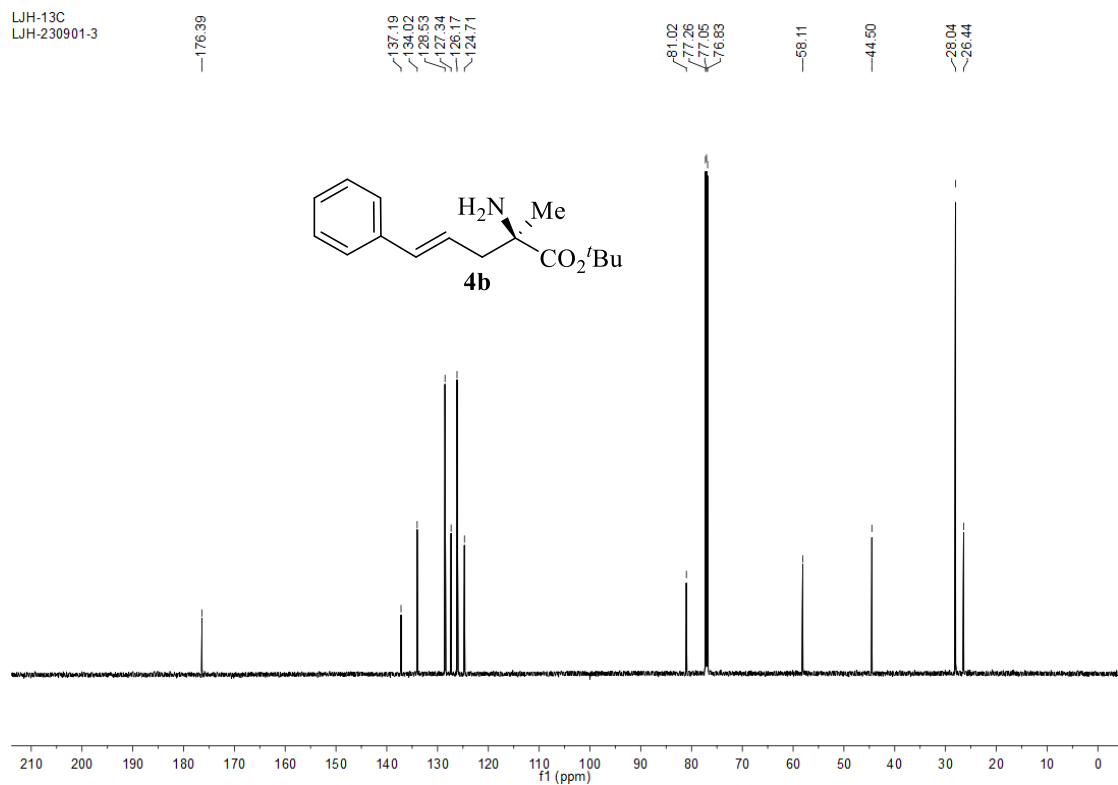



LJH-1H  
LJH-240305-2

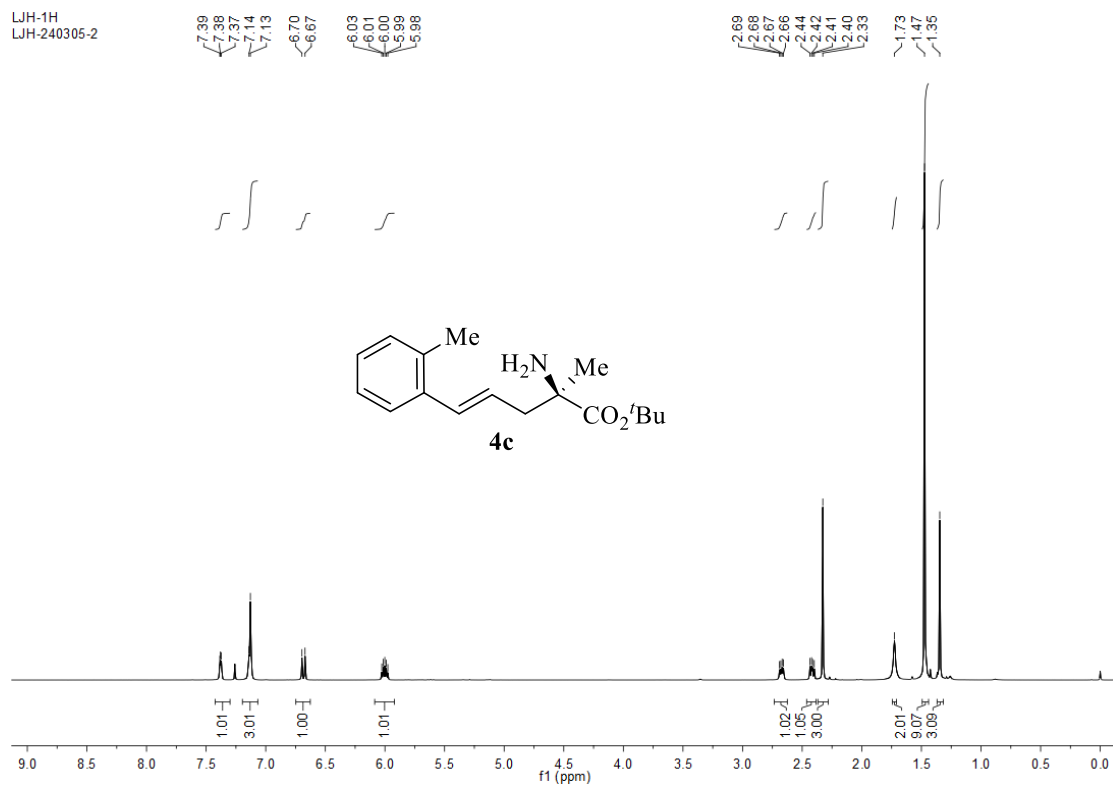

LJH-13C  
LJH-240305-2

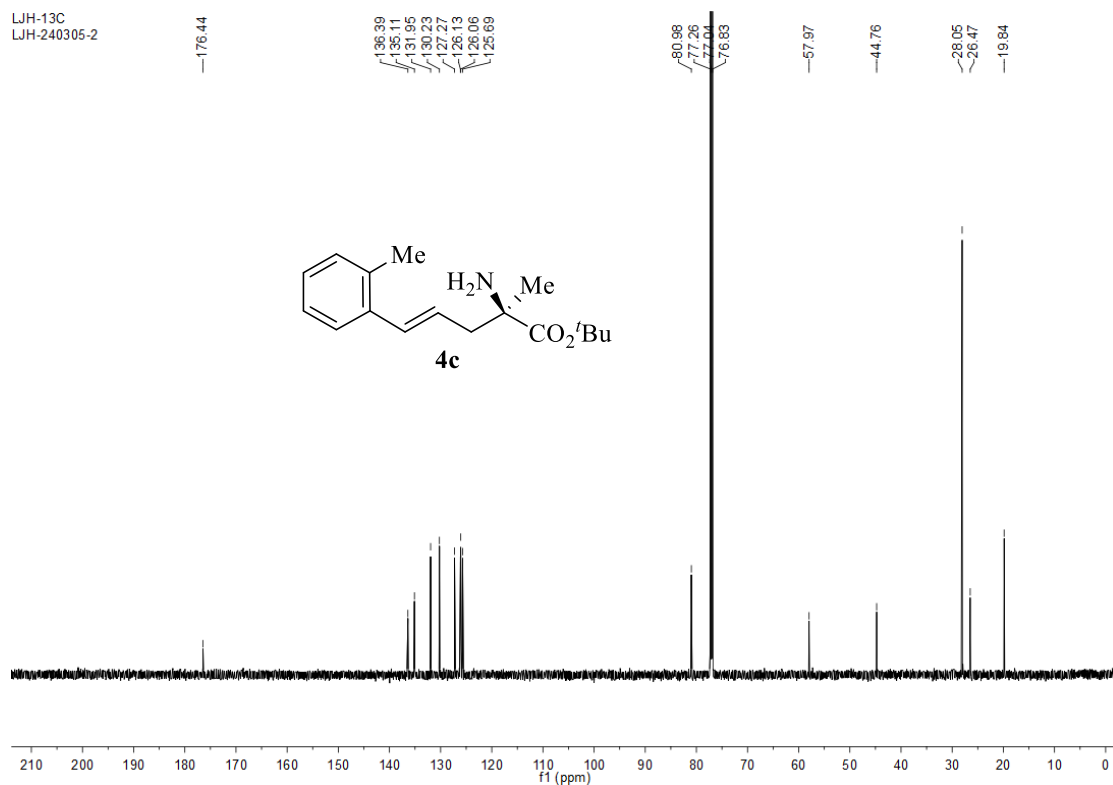

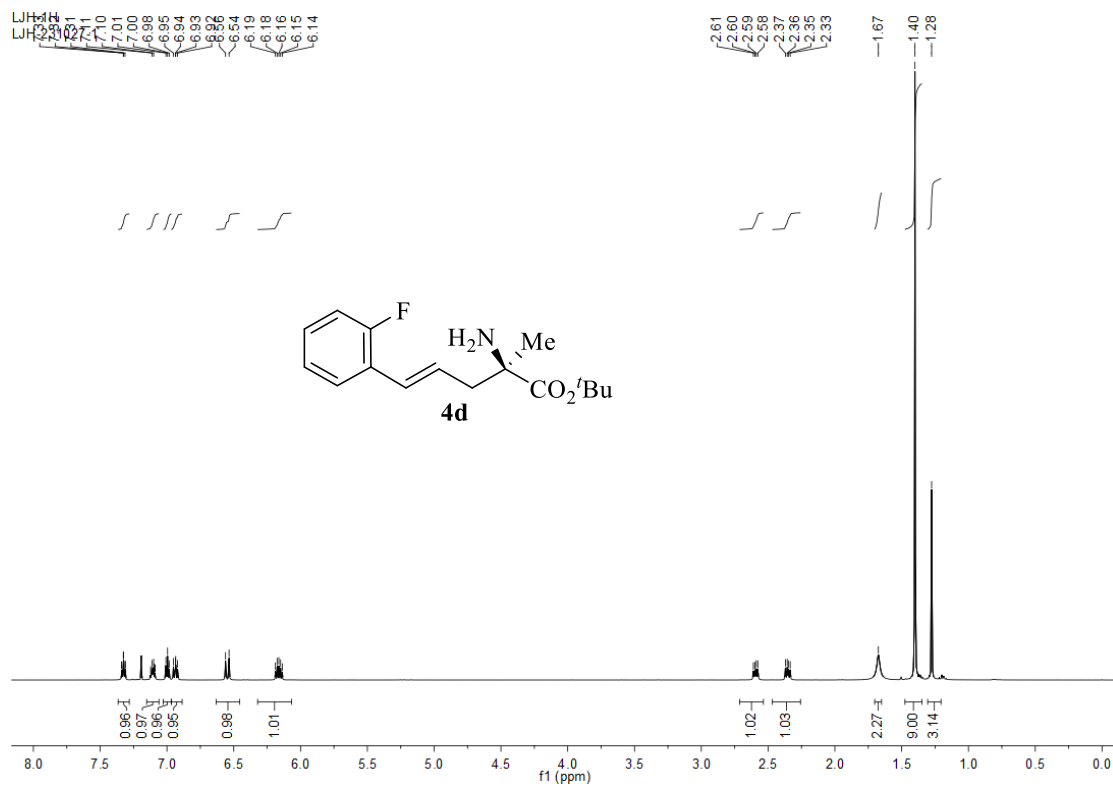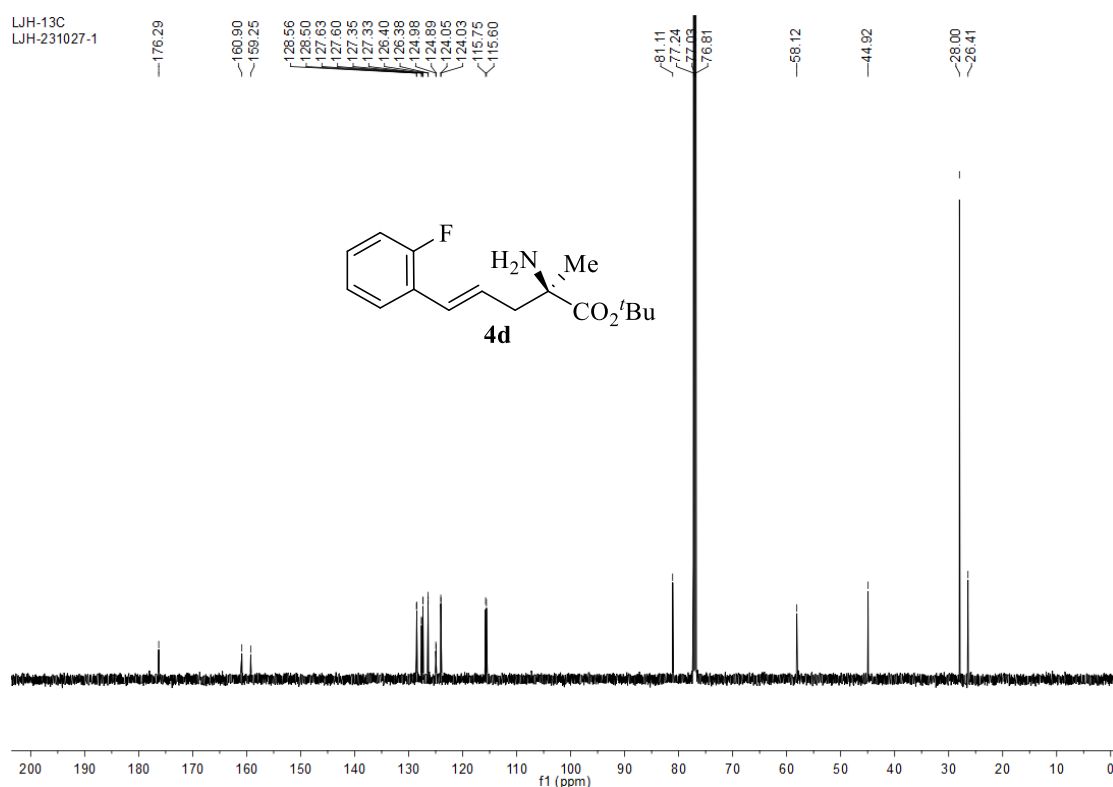

LJH-1H  
LJH-230905-1

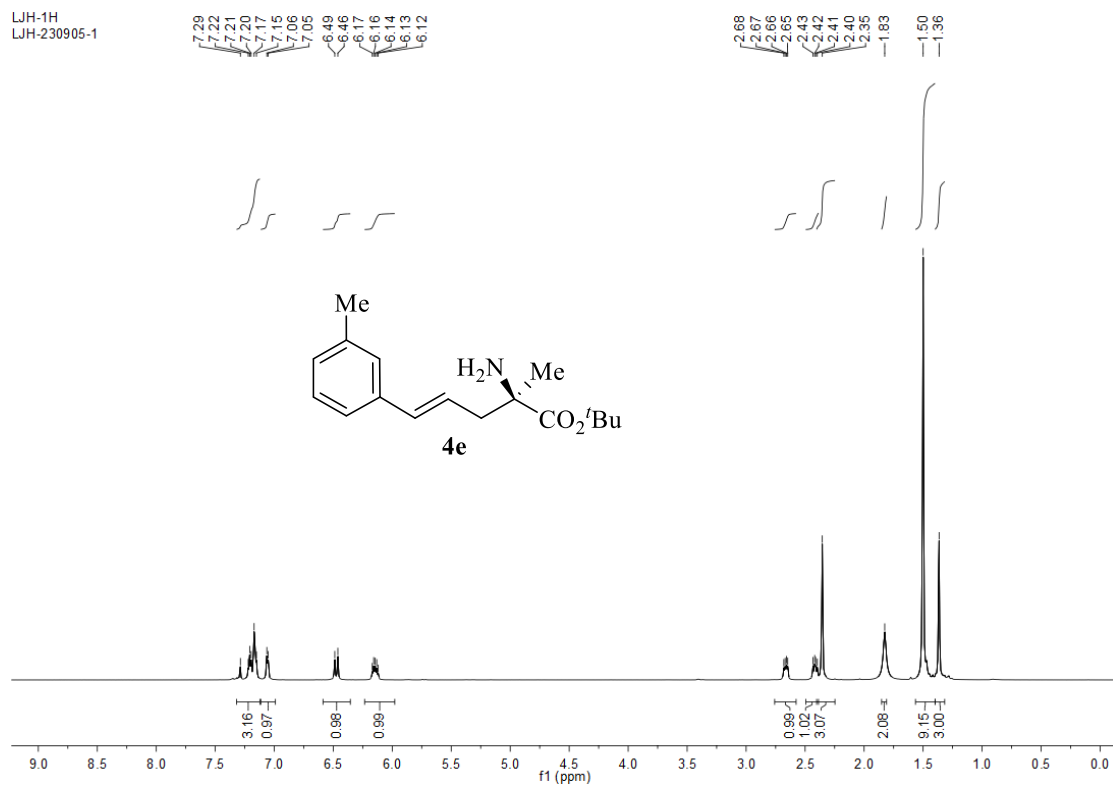

LJH-13C  
LJH-230905-3

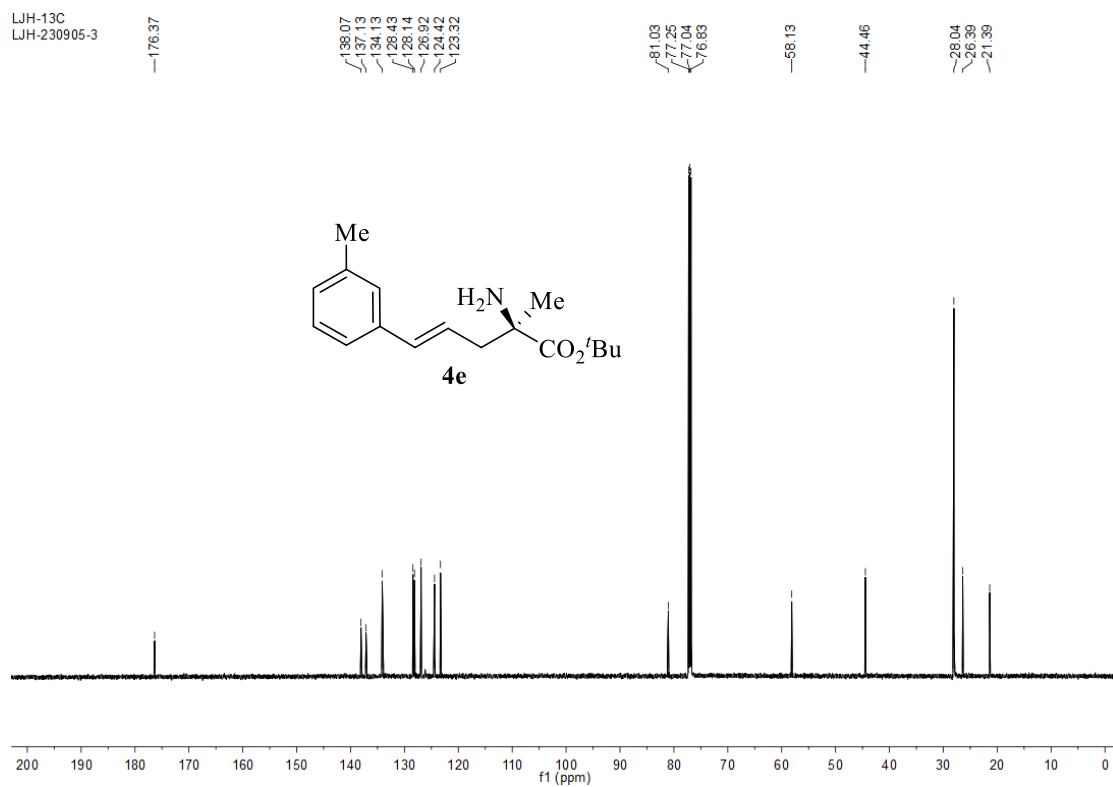

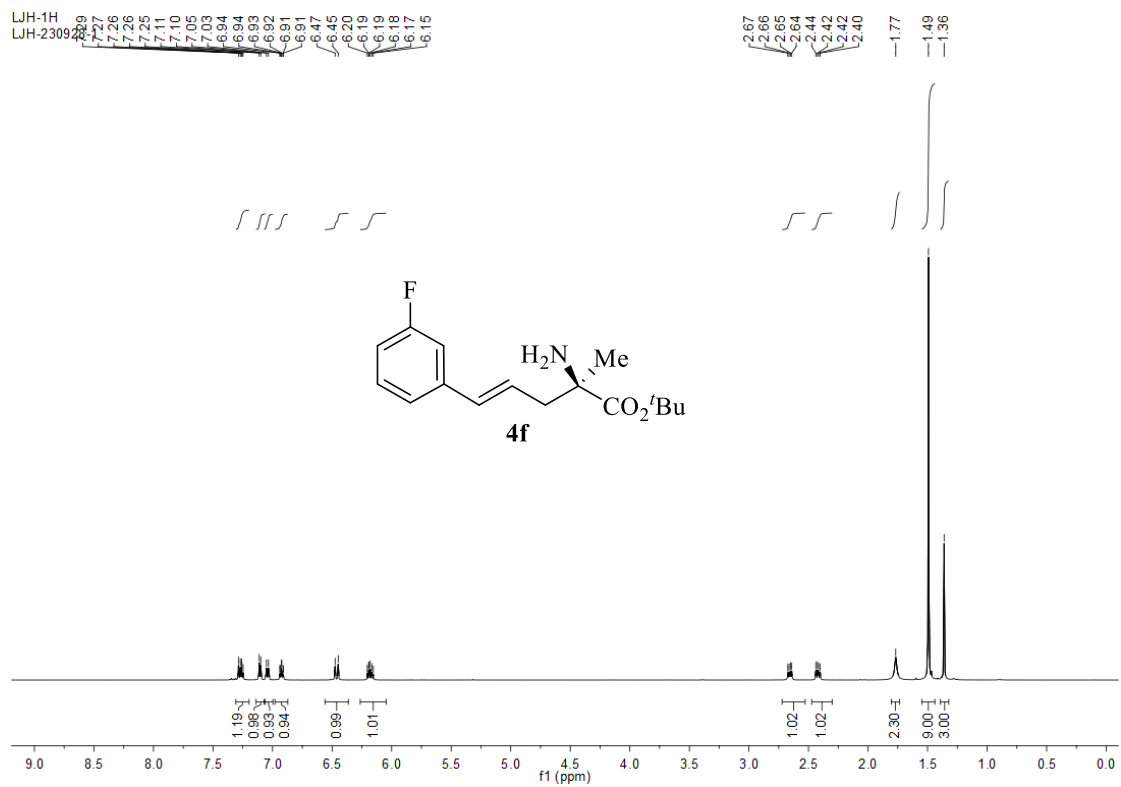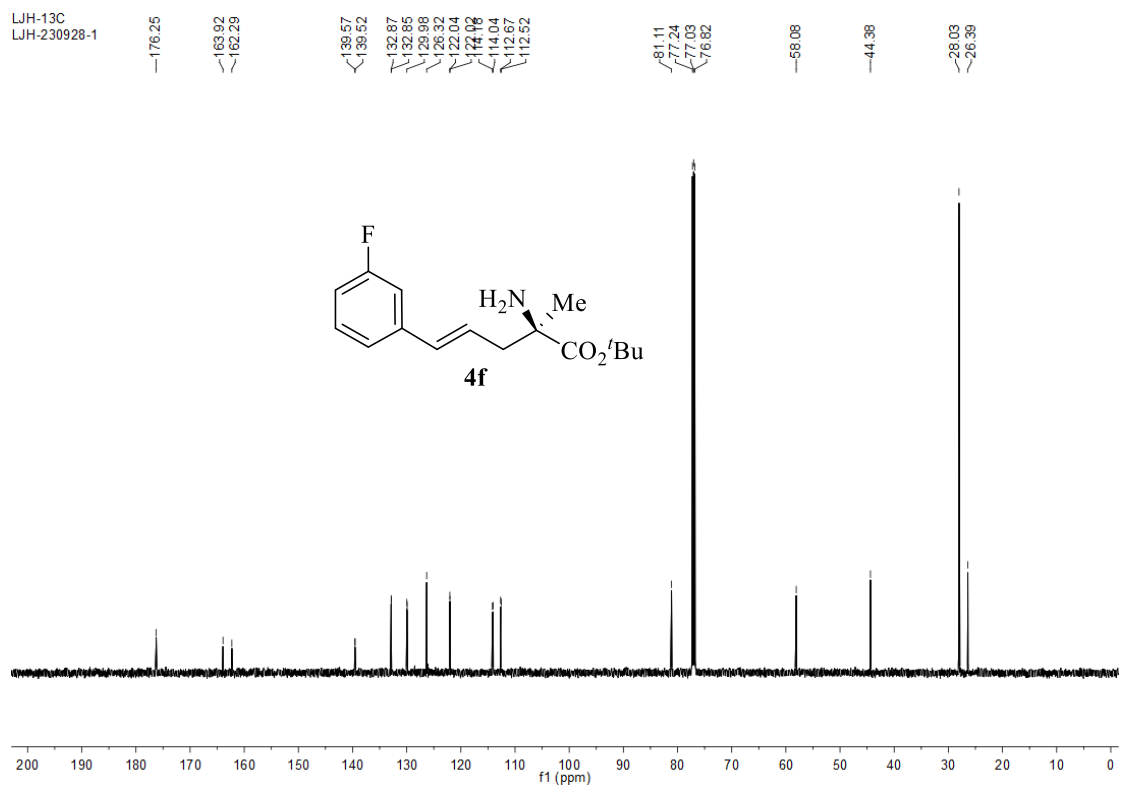

LJH-1H  
LJH-230909-2

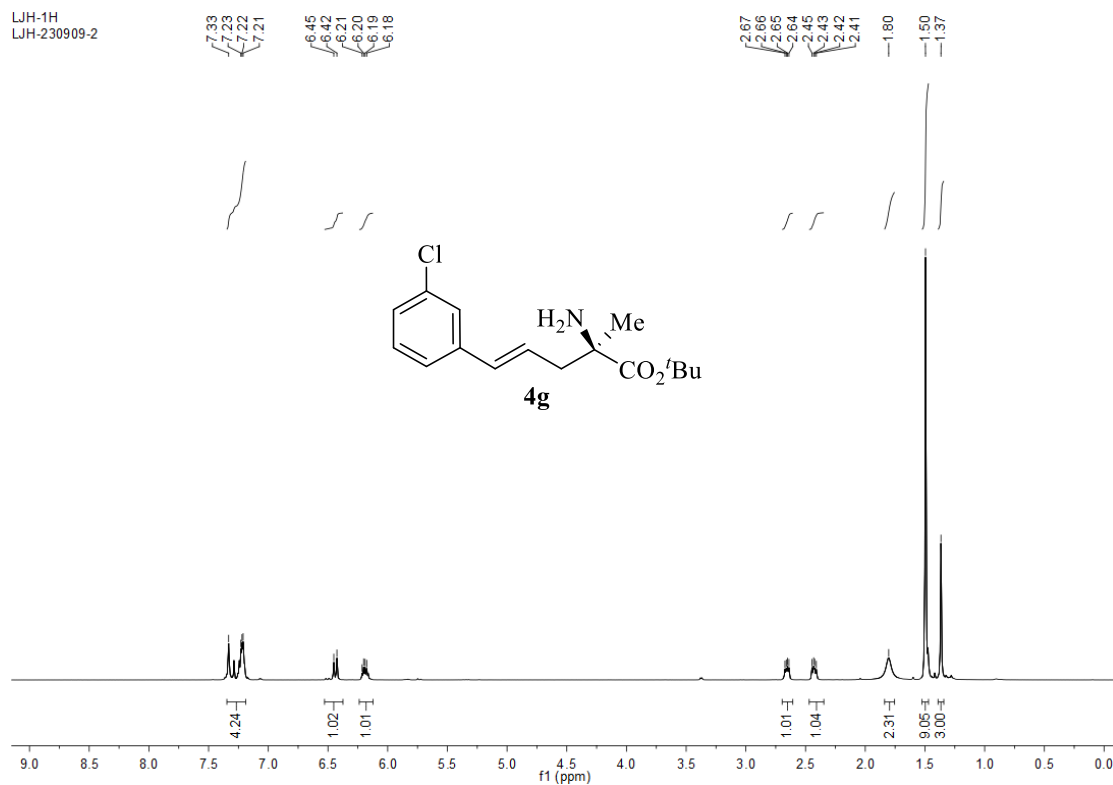

LJH-13C  
LJH-230909-2

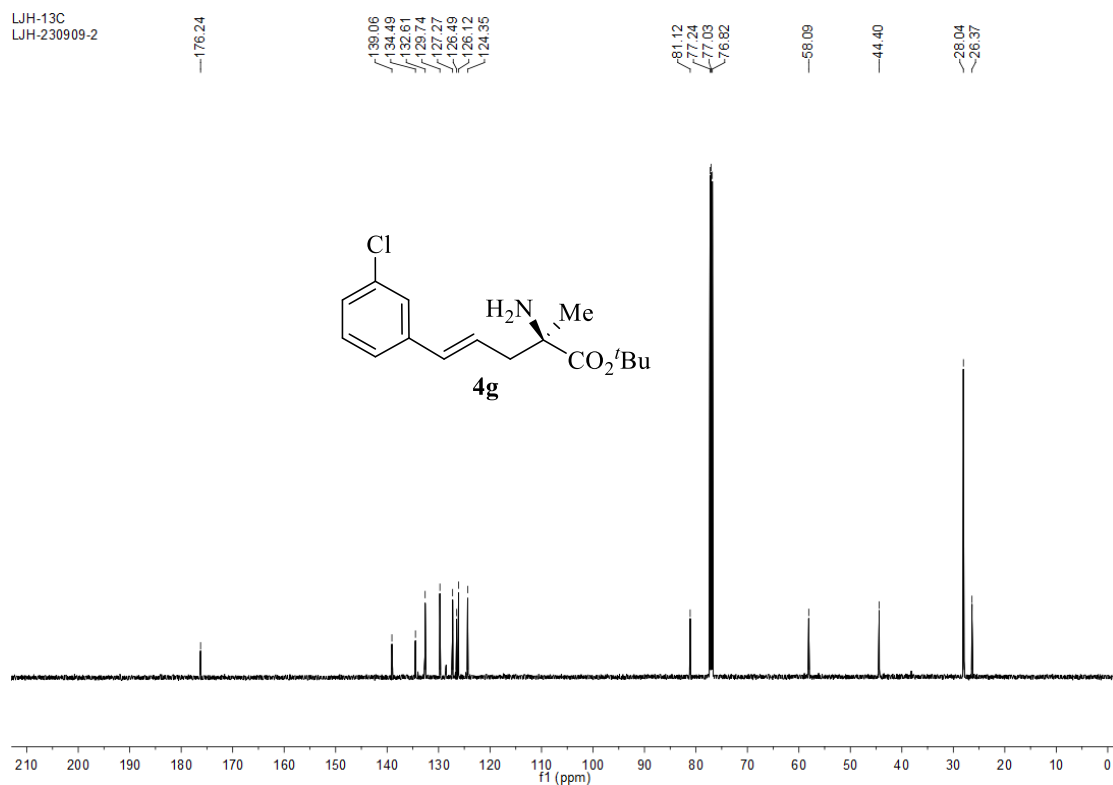

LJH-1H  
LJH-231011-1

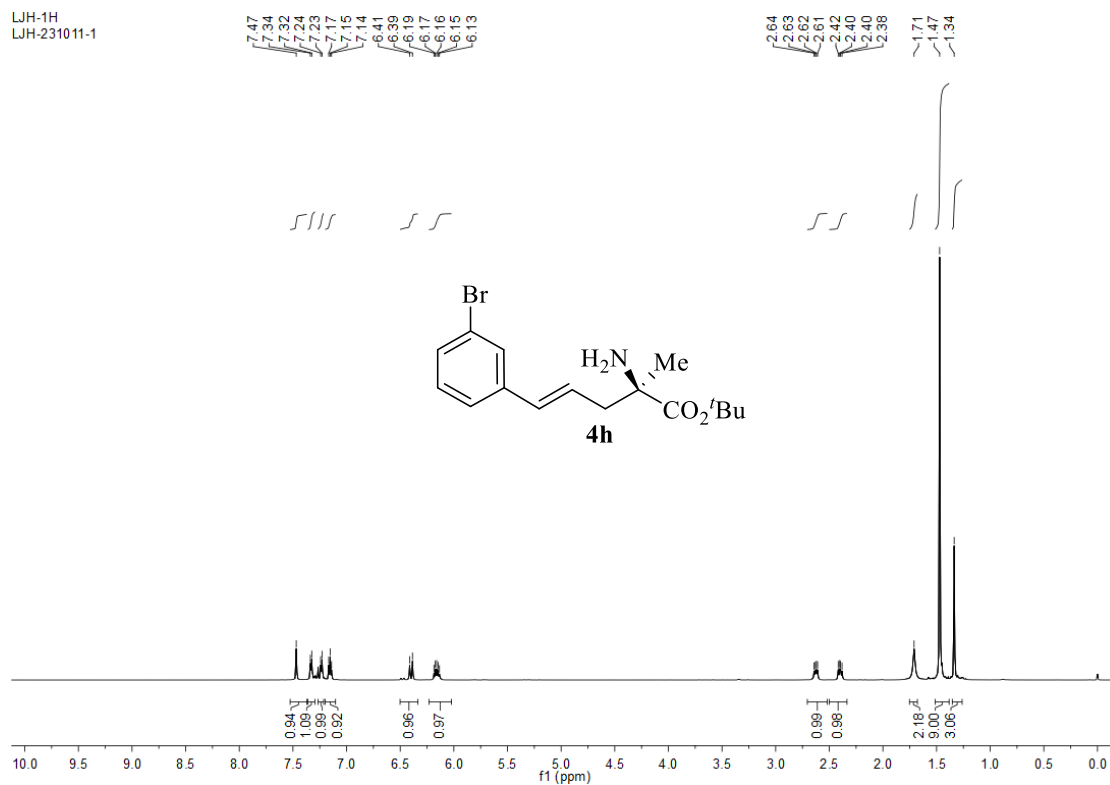

LJH-13C  
LJH-231011-1

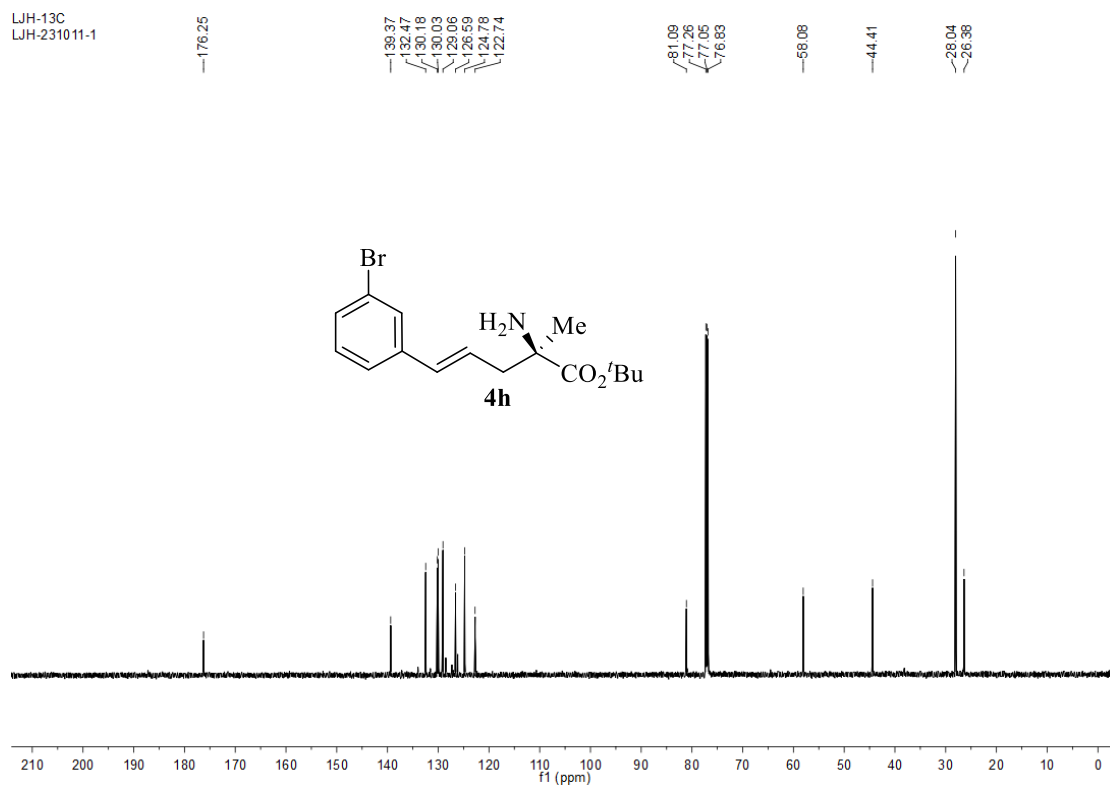

LJH-1H  
LJH-230917-1

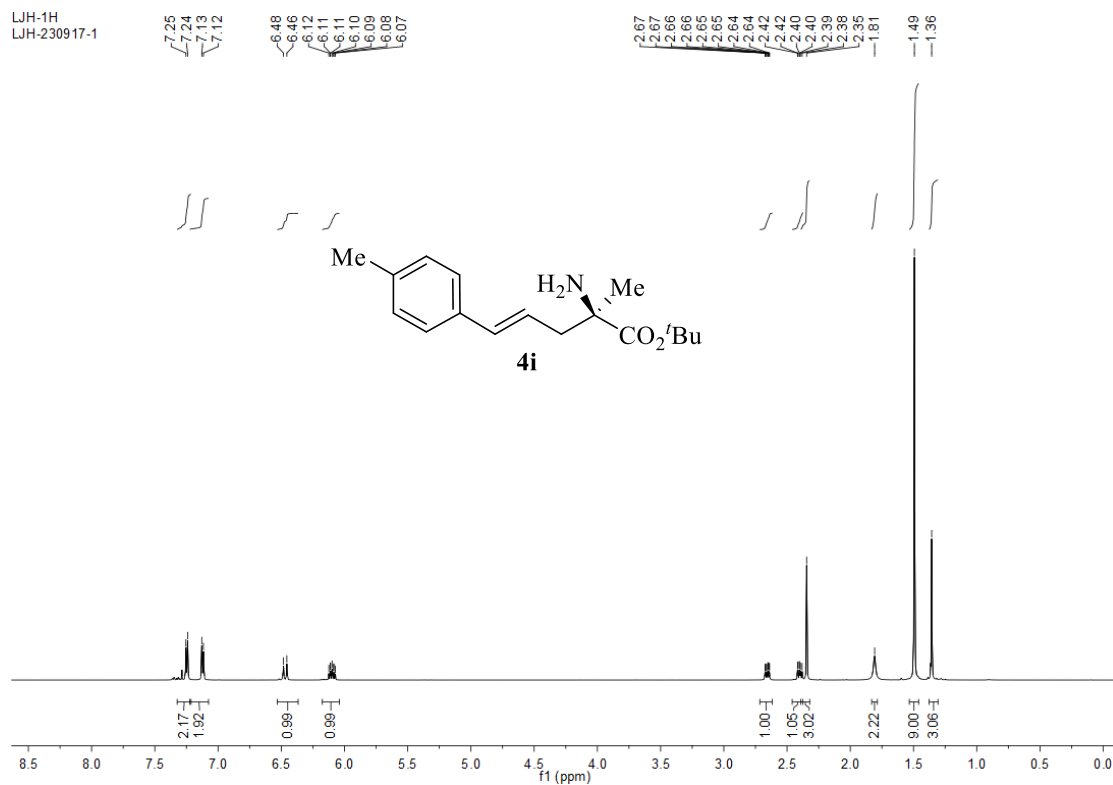

LJH-13C  
LJH-230917-1

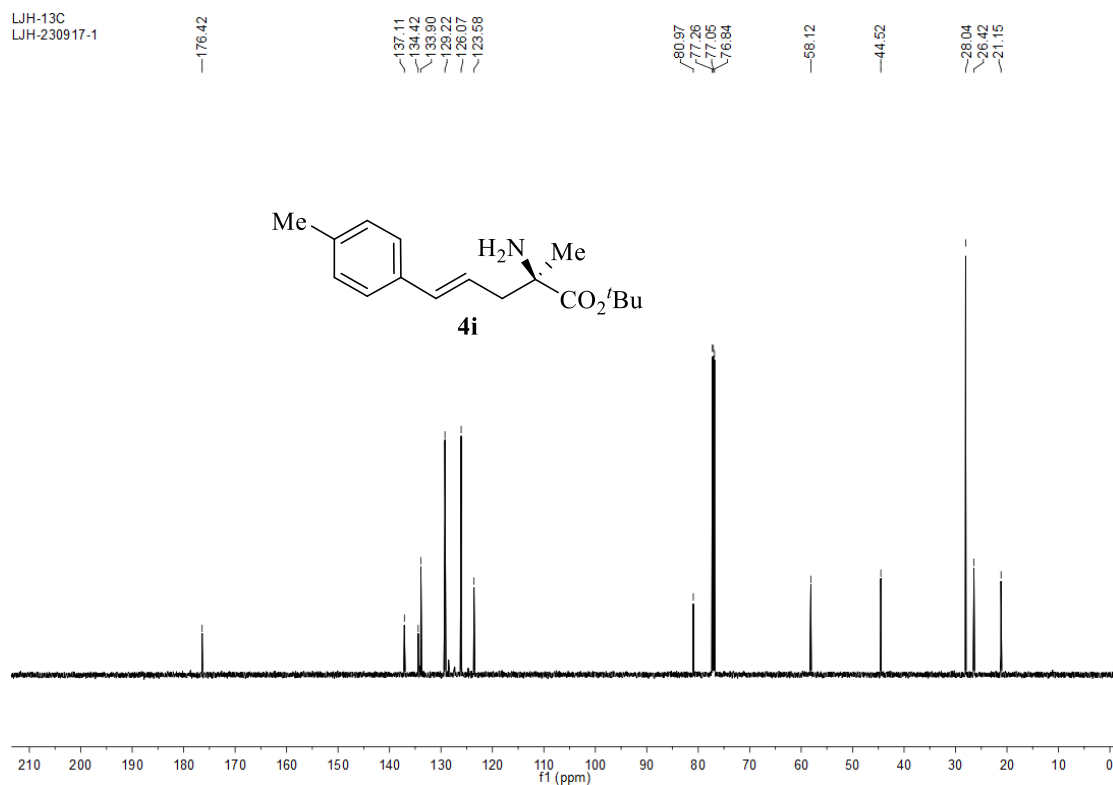

LJH-1H  
LJH-230915-1

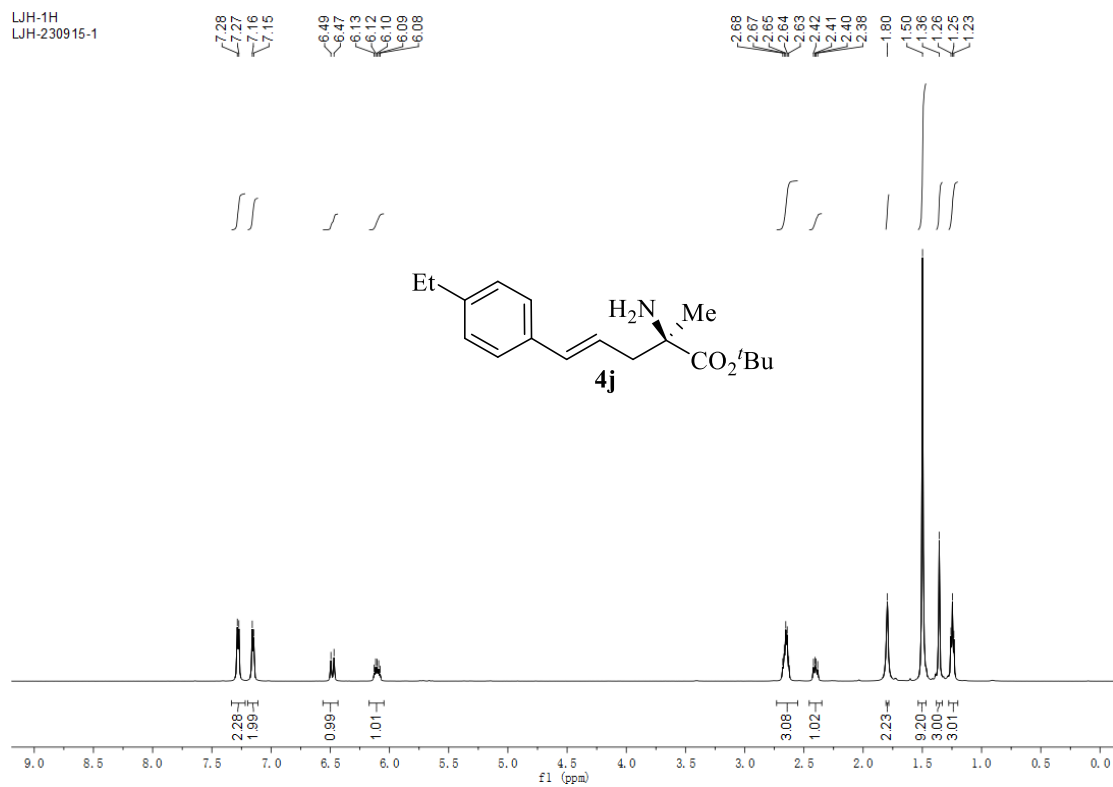

LJH-13C  
LJH-230915-1

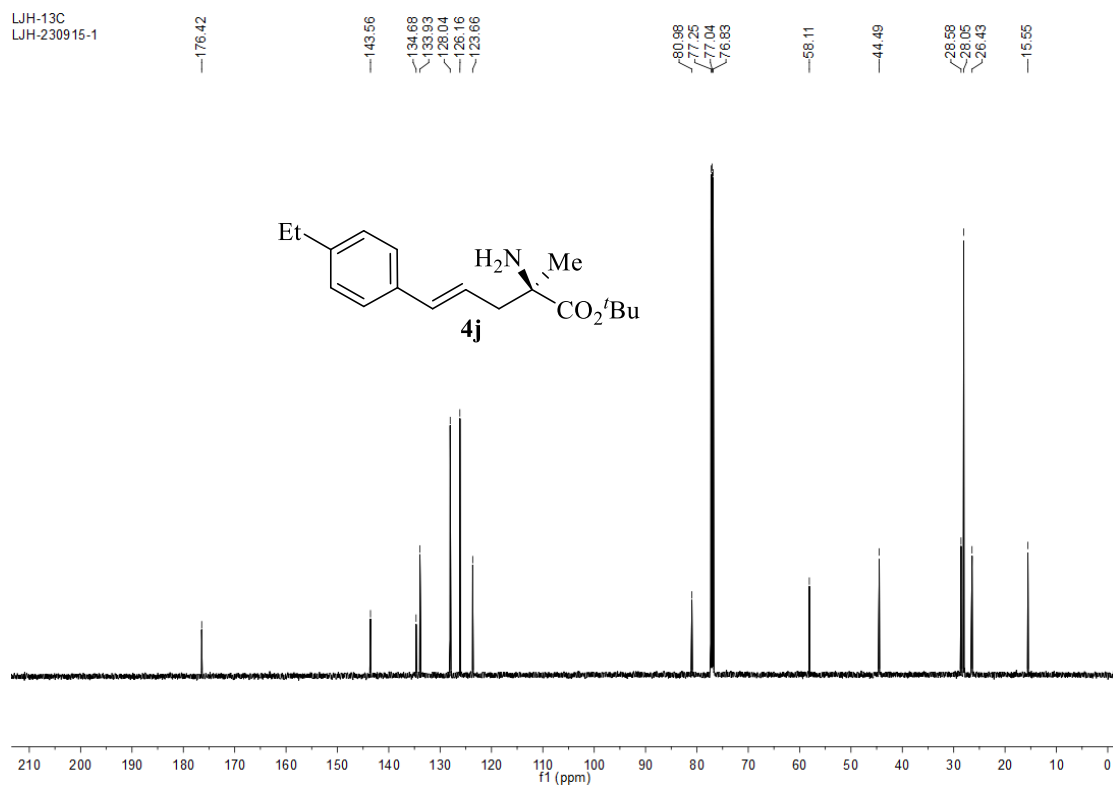



LJH-1H  
LJH-231003-1

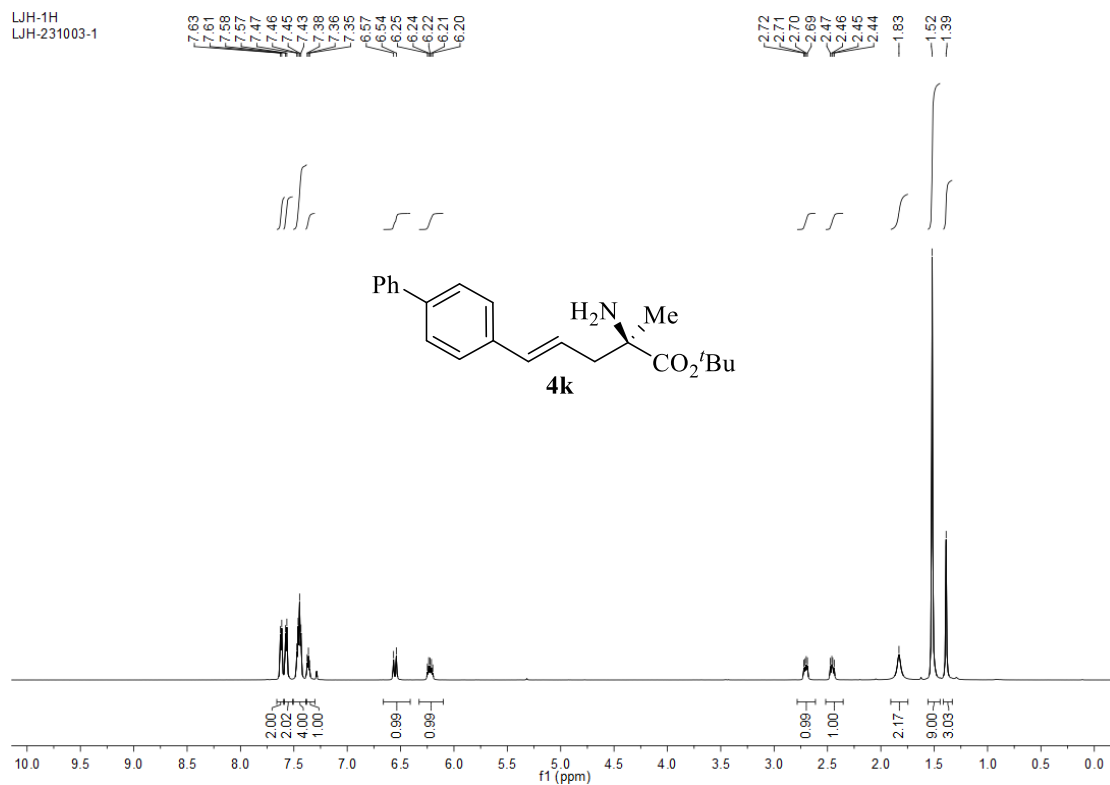

LJH-13C  
LJH-231003-1

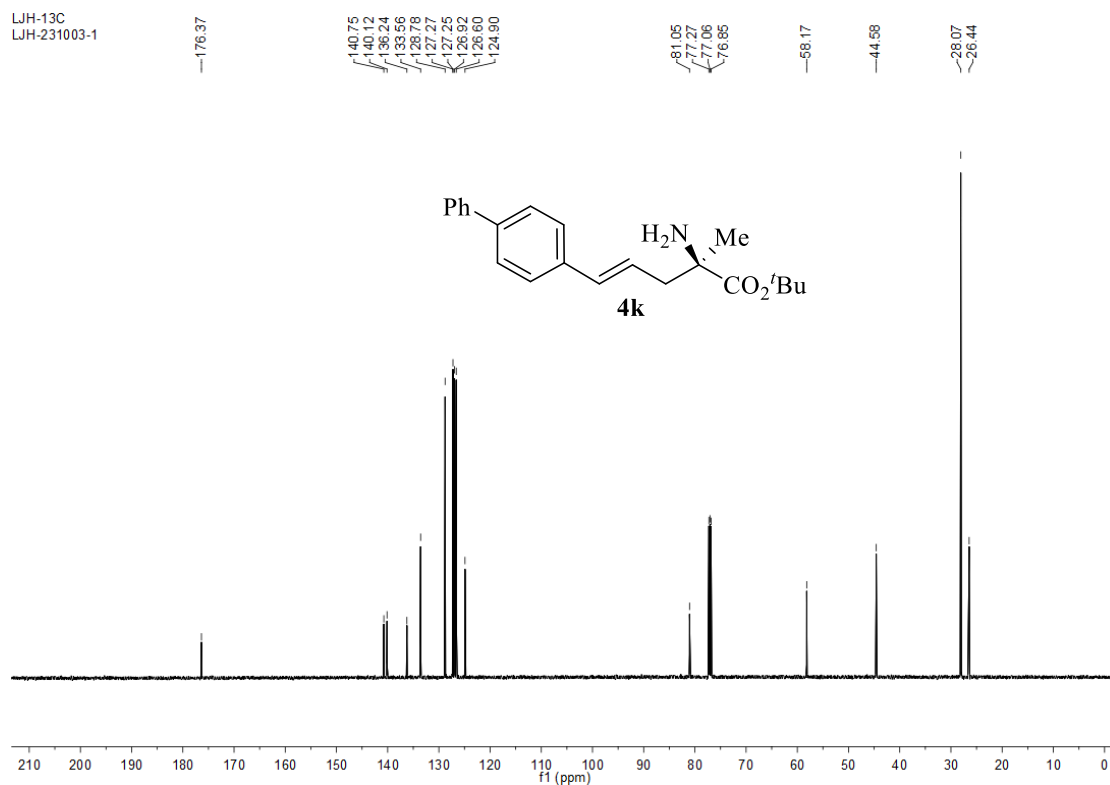

LJH-1H  
LJH-230905-1

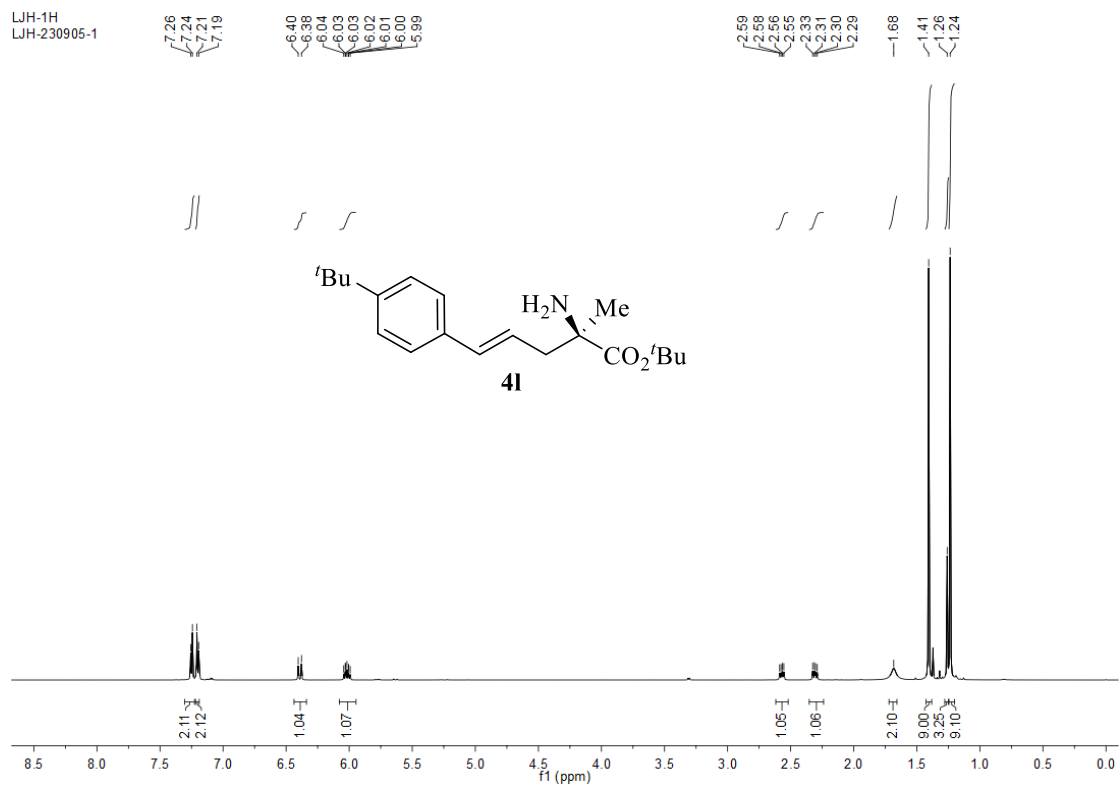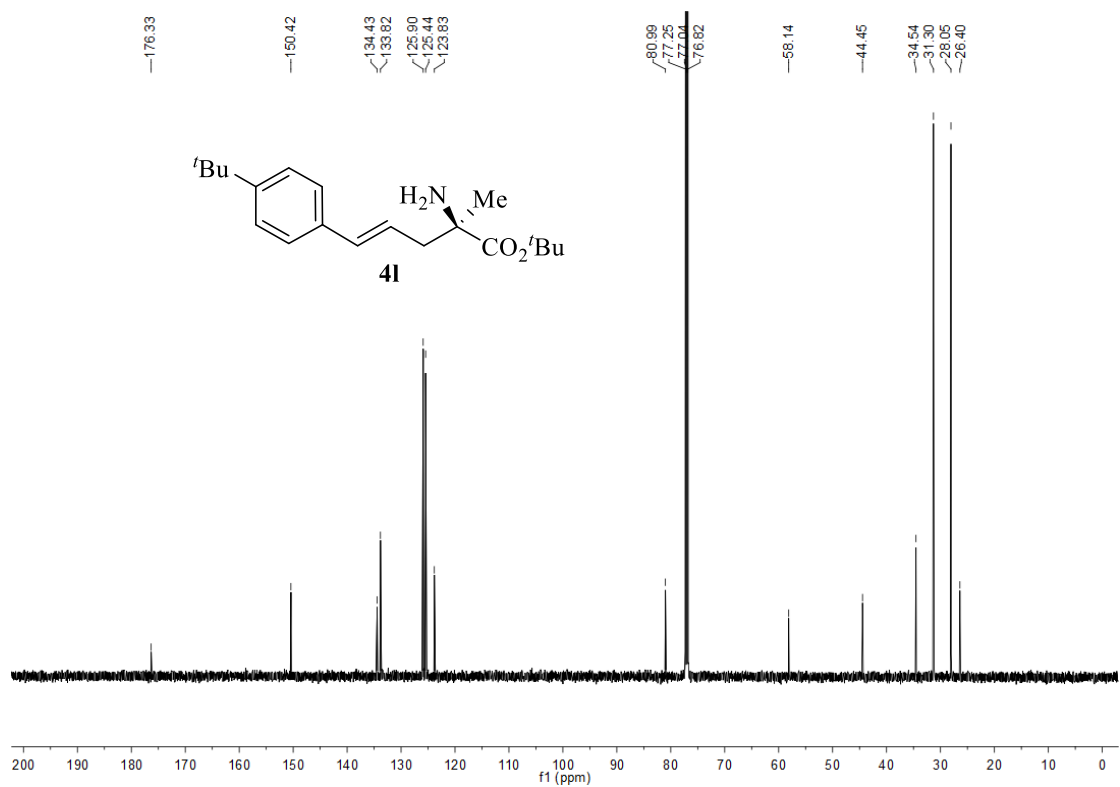

LJH-1H  
LJH-230911-1

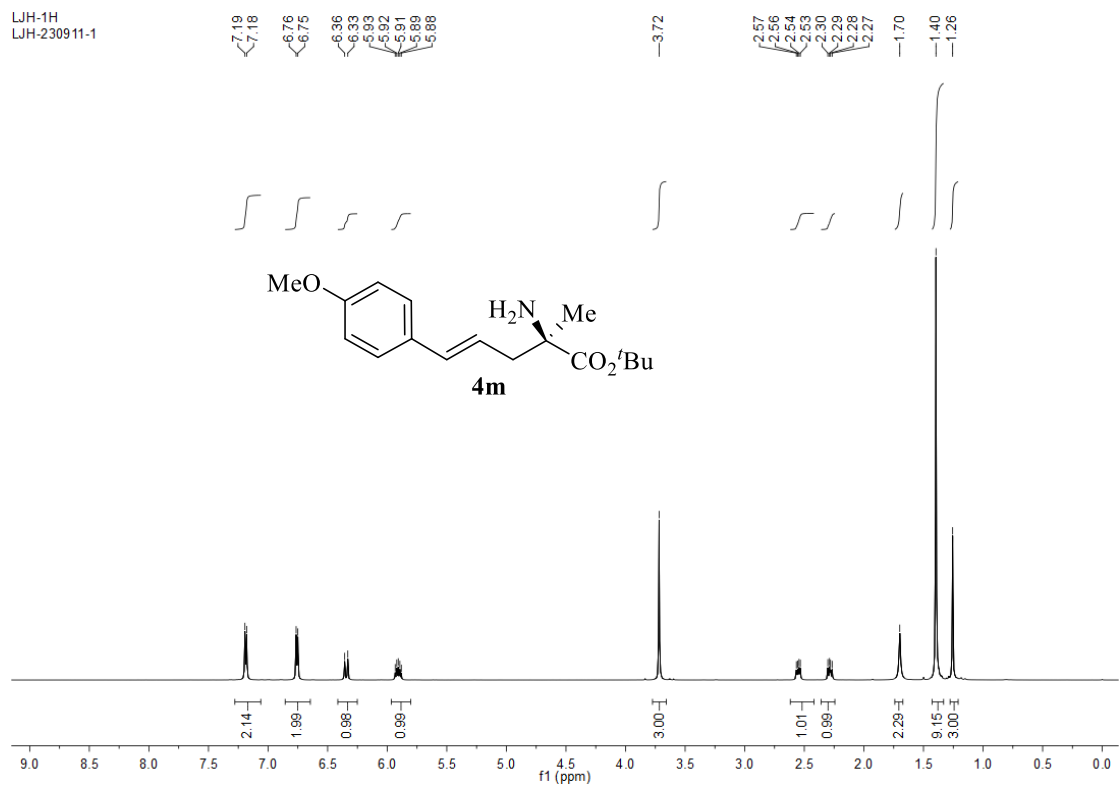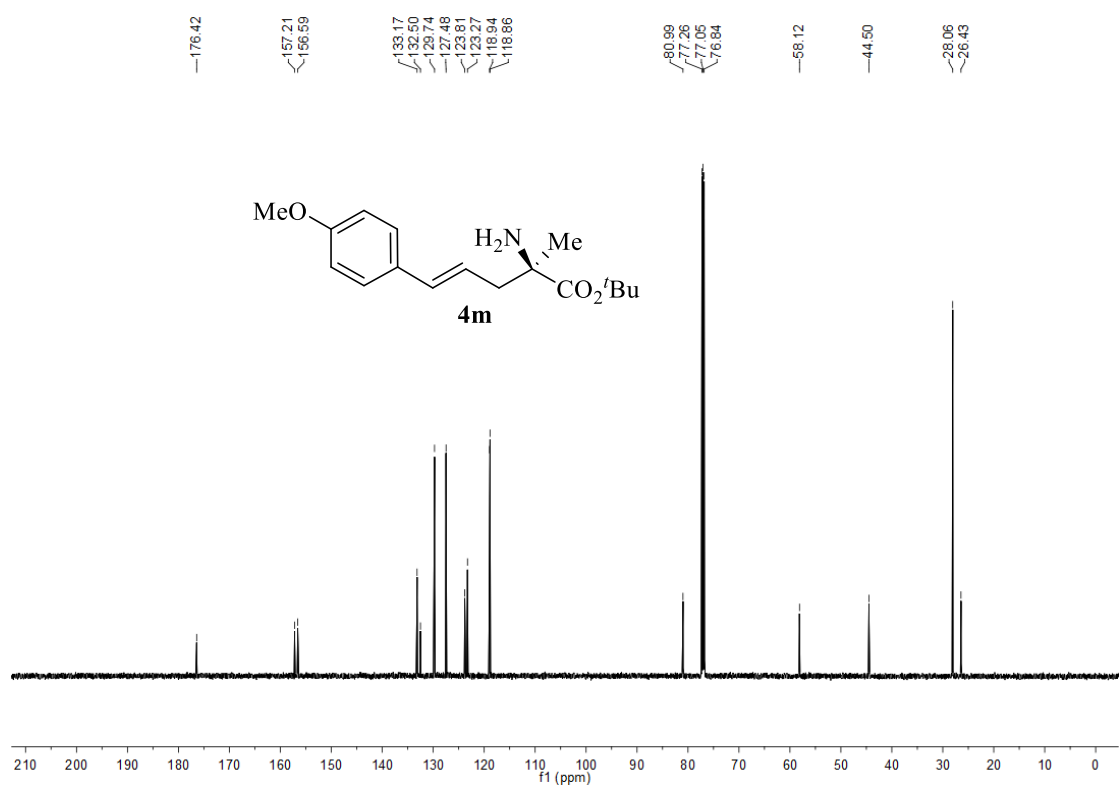

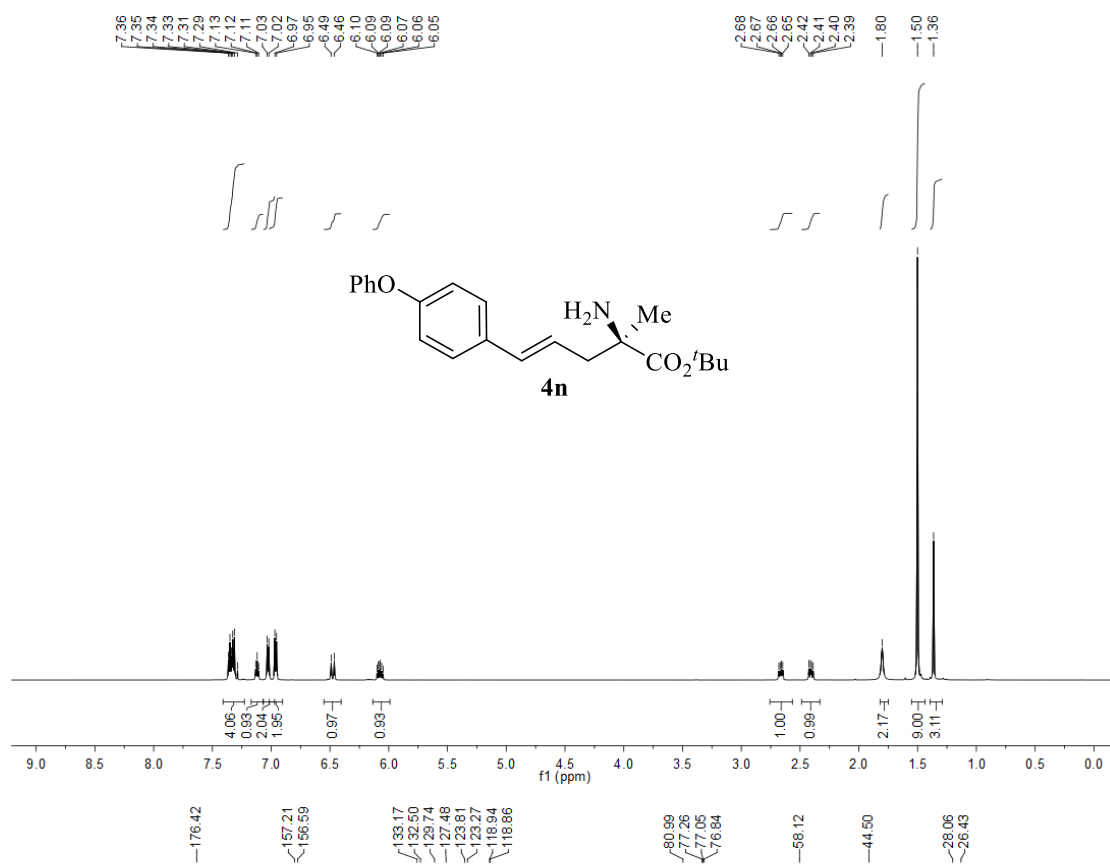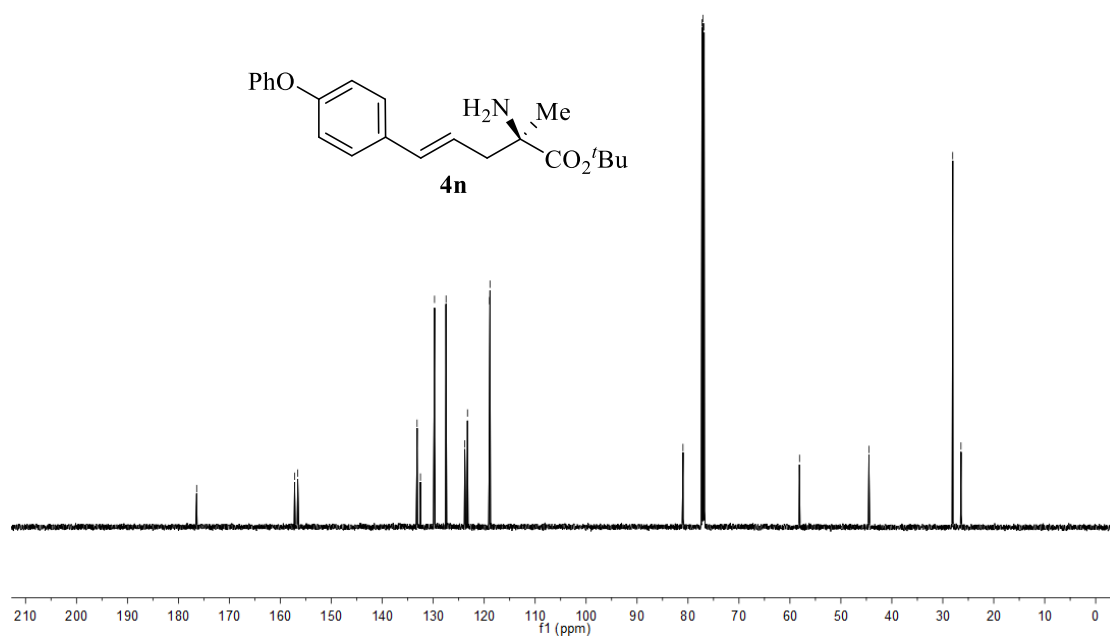

LJH-1H  
LJH-230922-1

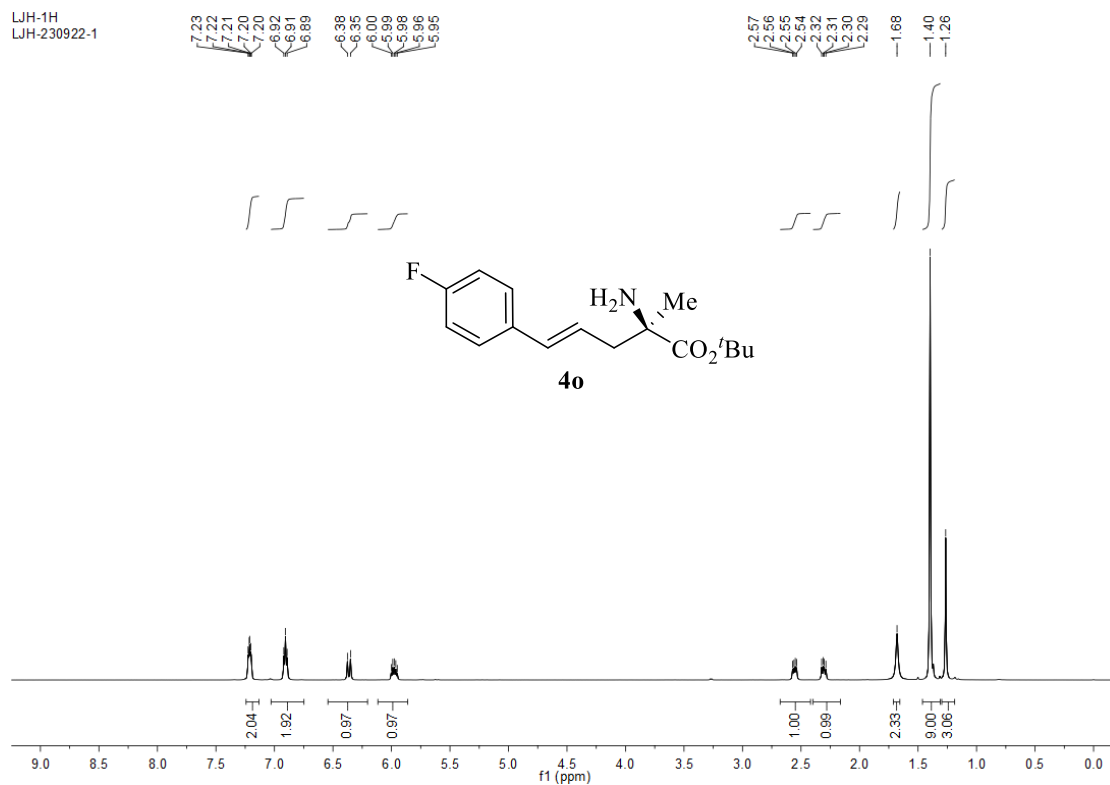

LJH-13C  
LJH-230922-1

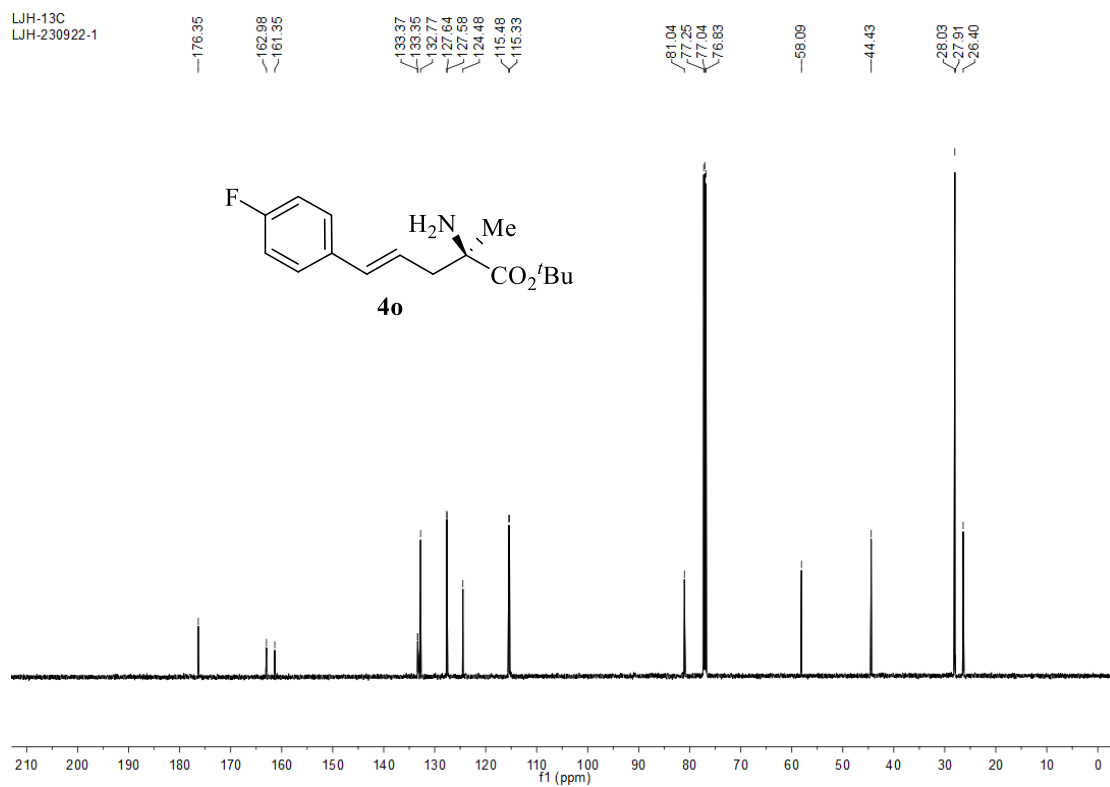

LJH-1H  
LJH-230927-1

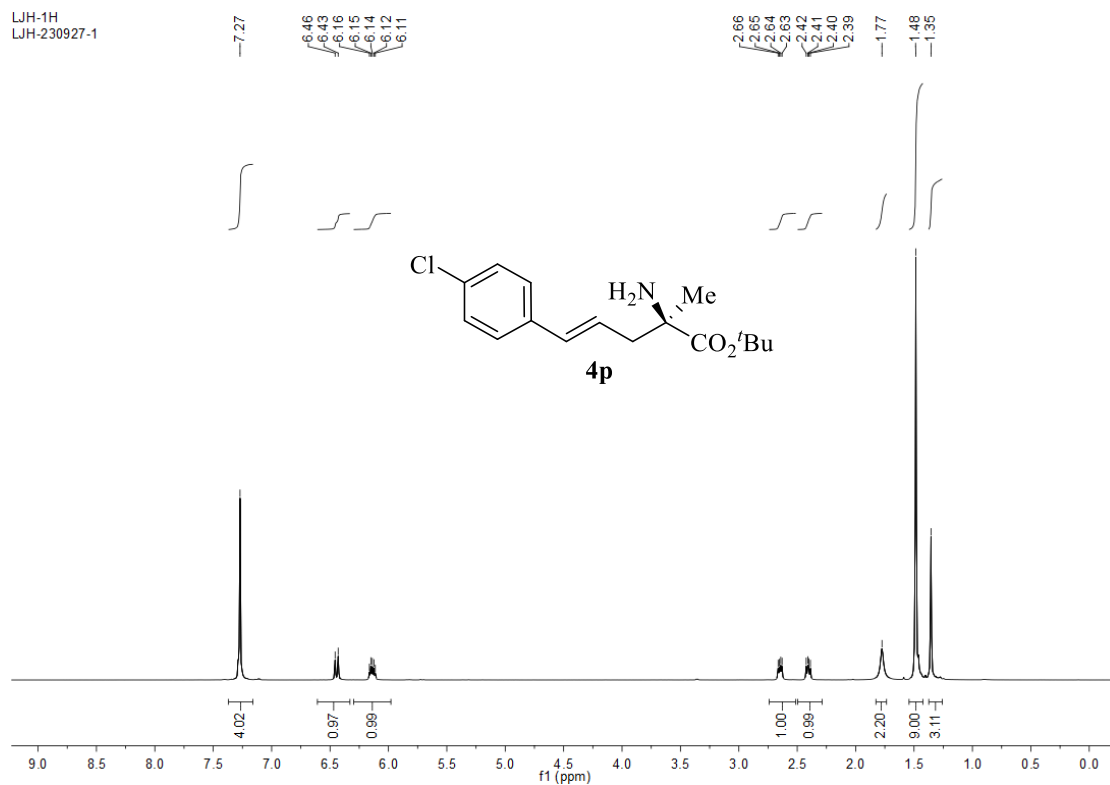

LJH-13C  
LJH-230927-1

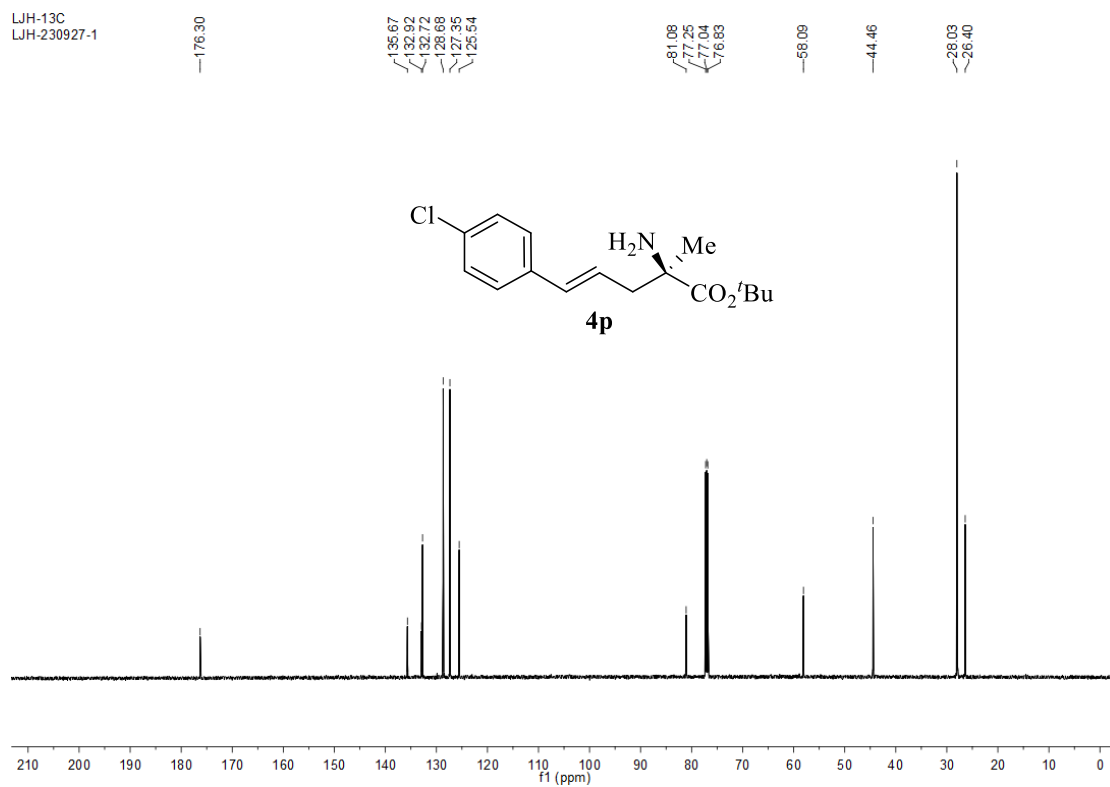

LJH-1H  
LJH-231002-1

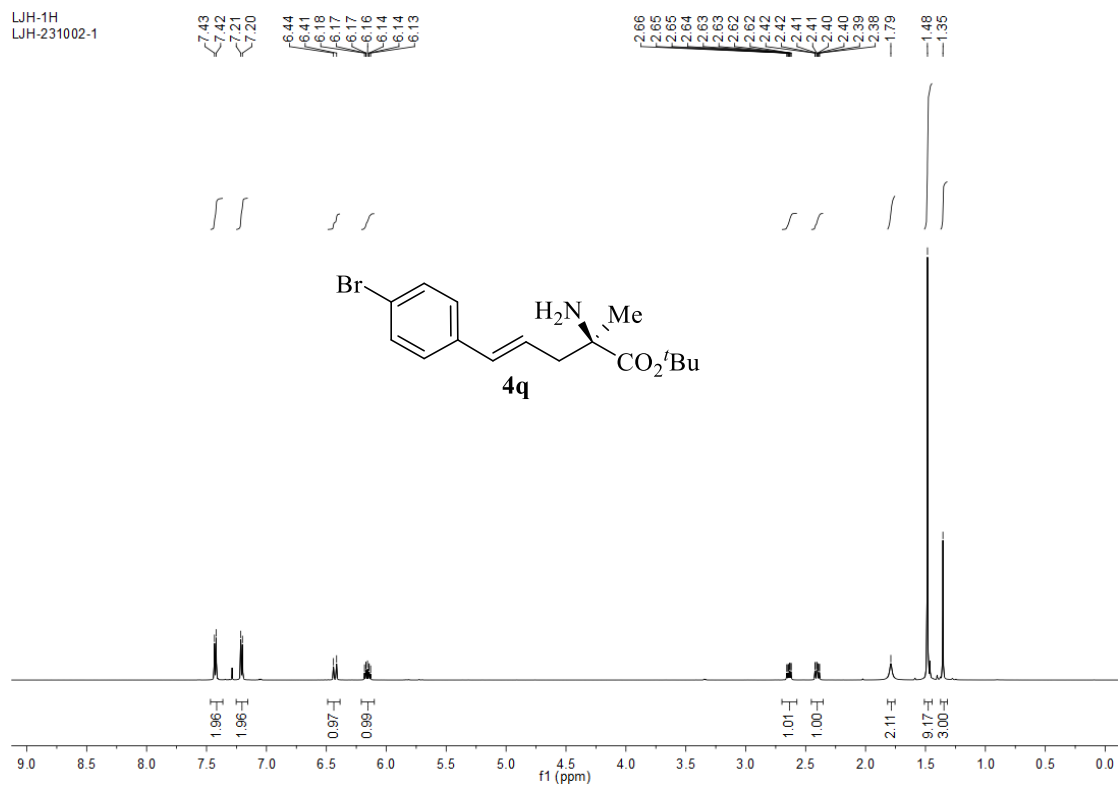

LJH-13C  
LJH-231002-1

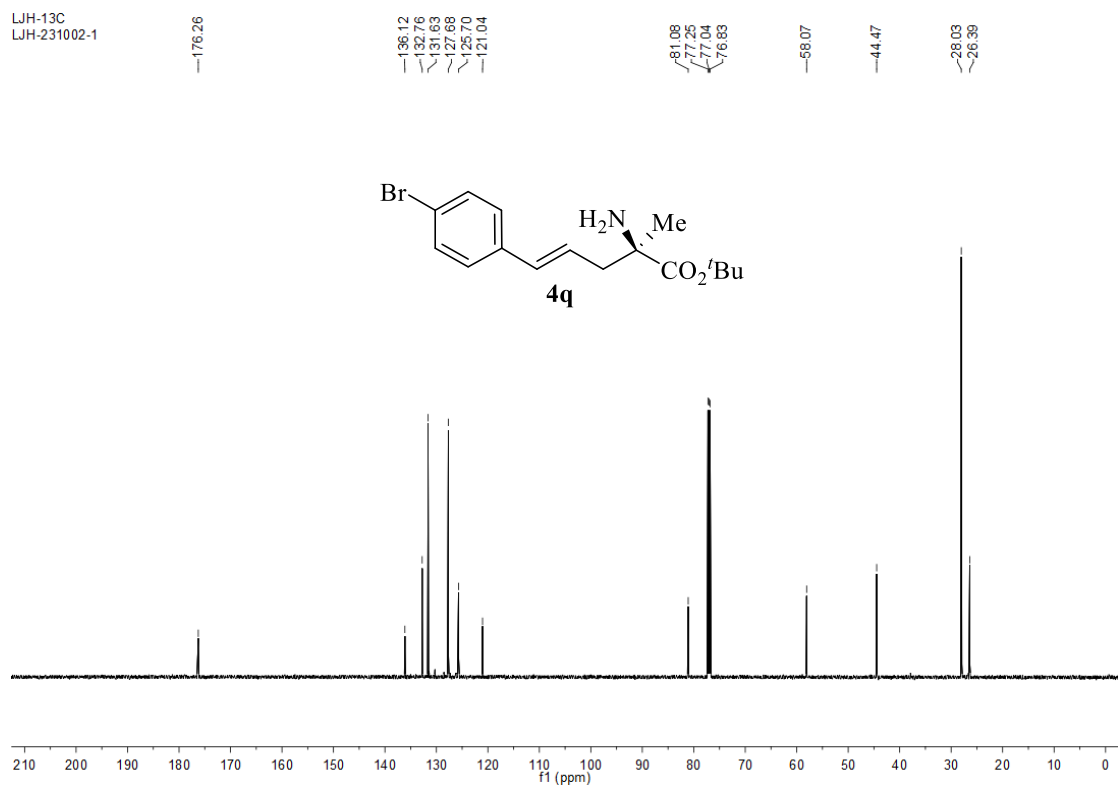

Desktop  
LJH-231022-2

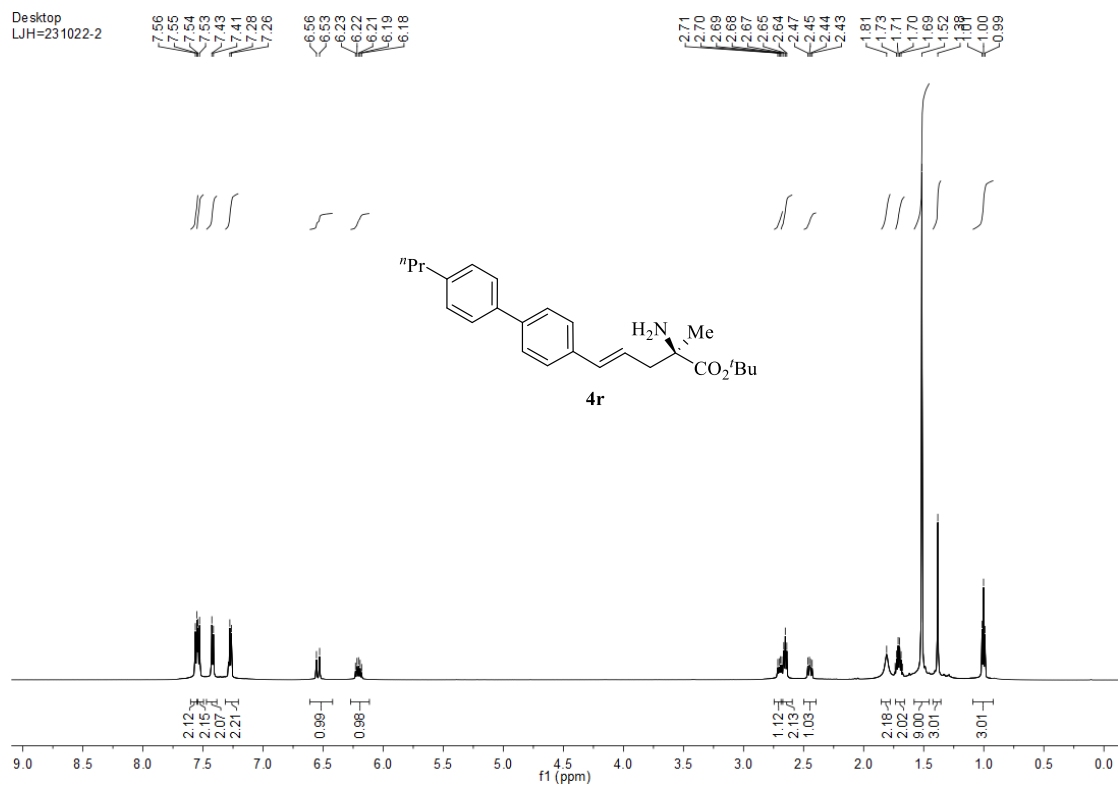

LJH-13C  
LJH-231022-2

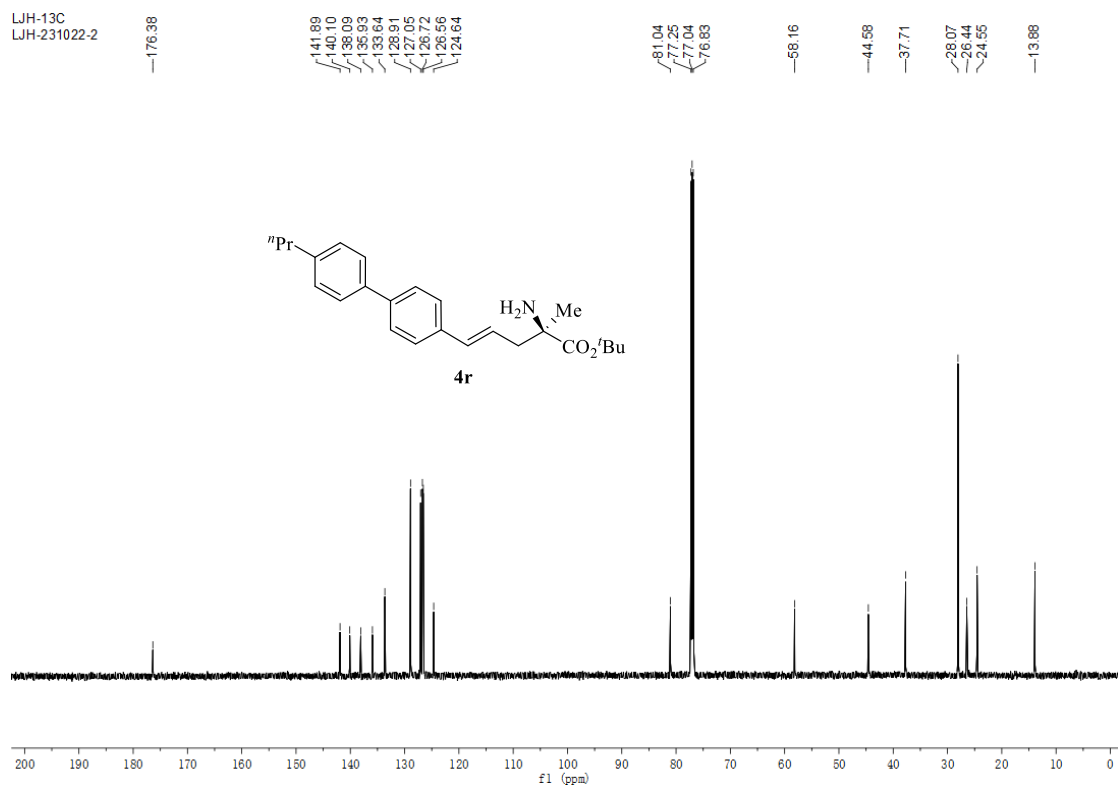



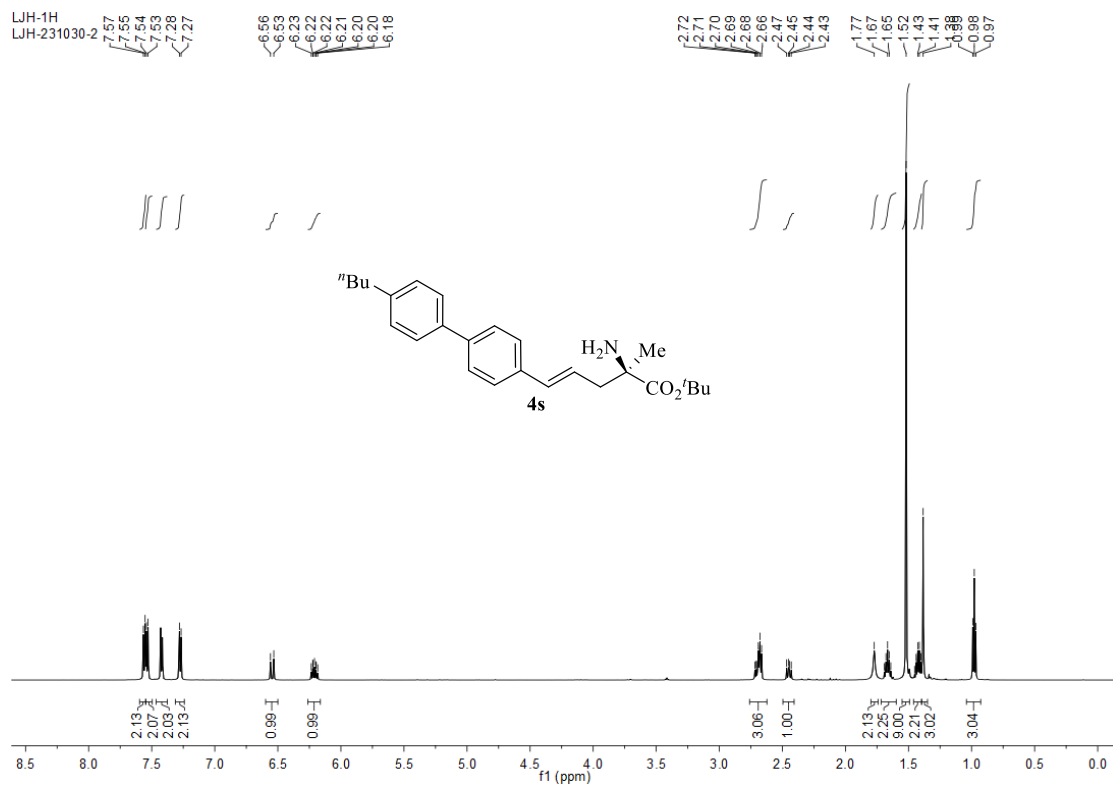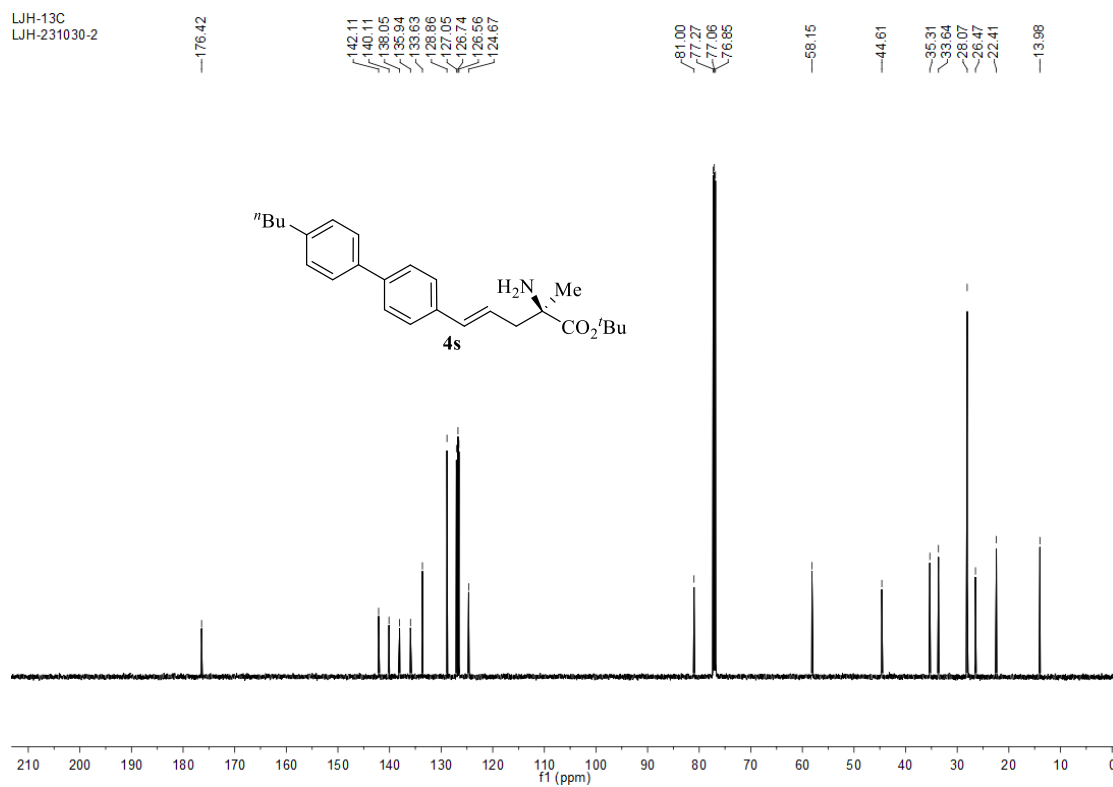

LJH-1H  
LJH-231018-1

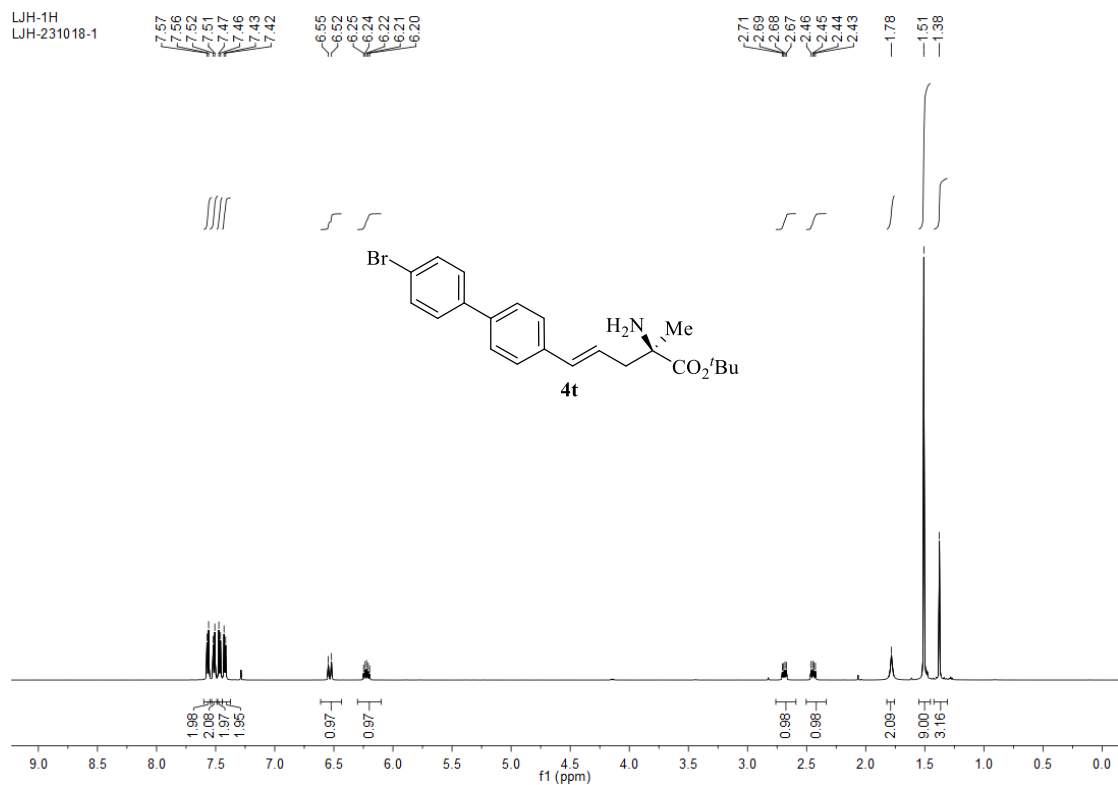

LJH-13C  
LJH-2301018-1

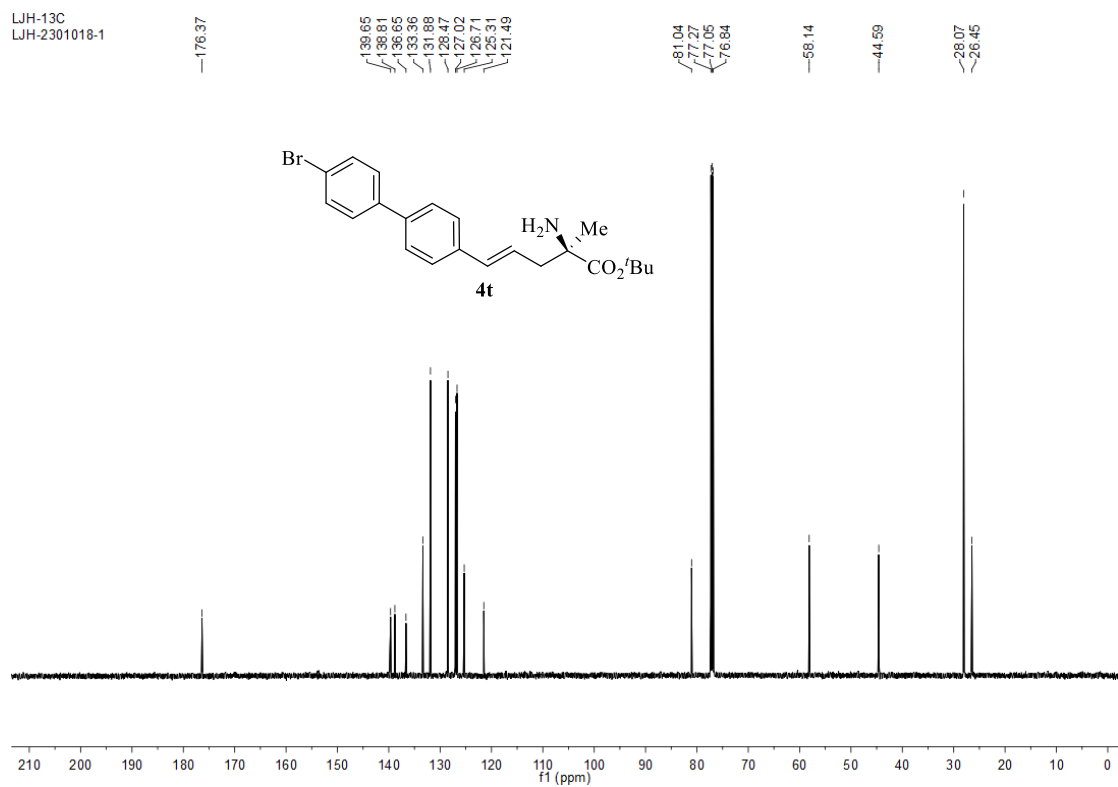

LJH-1H  
LJH-230913-1

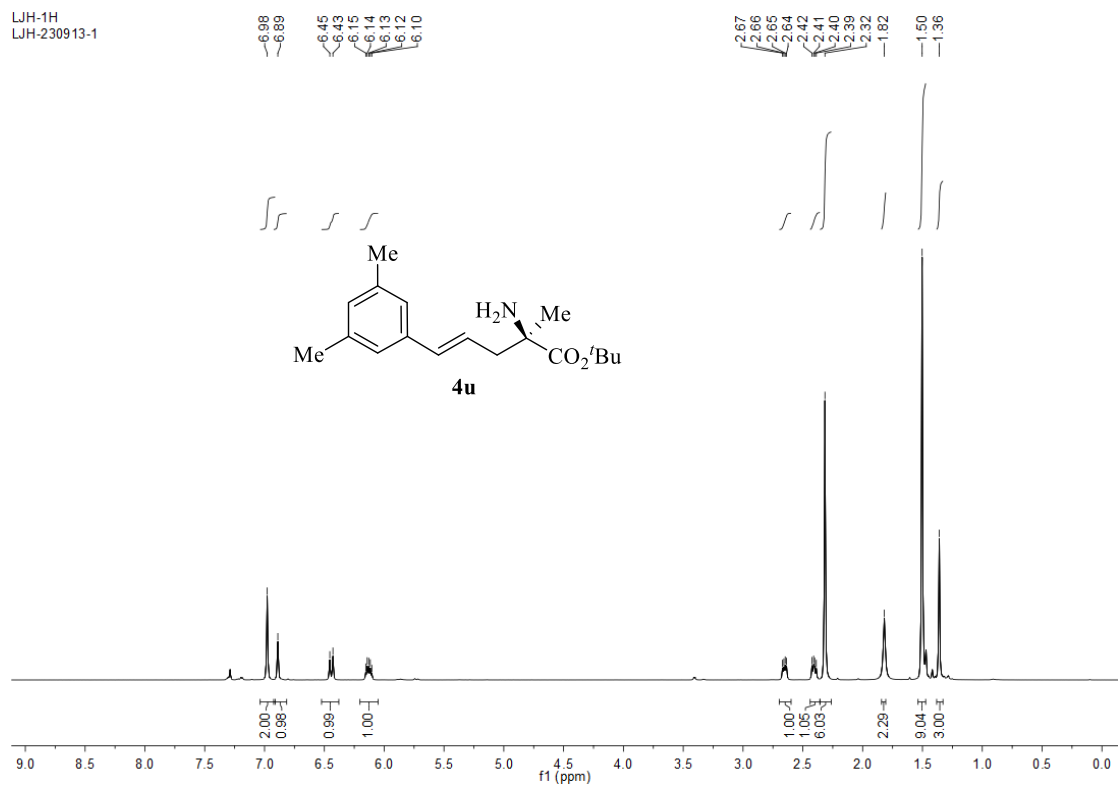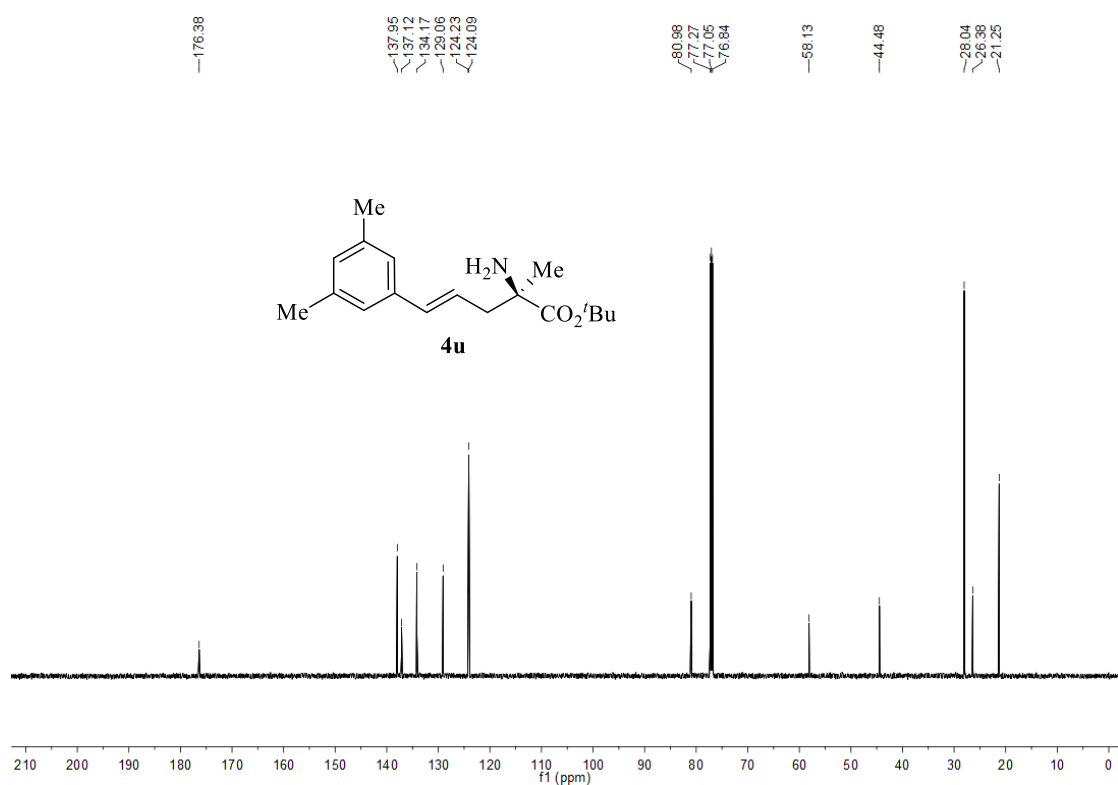

LJH-1H  
LJH-230919-1

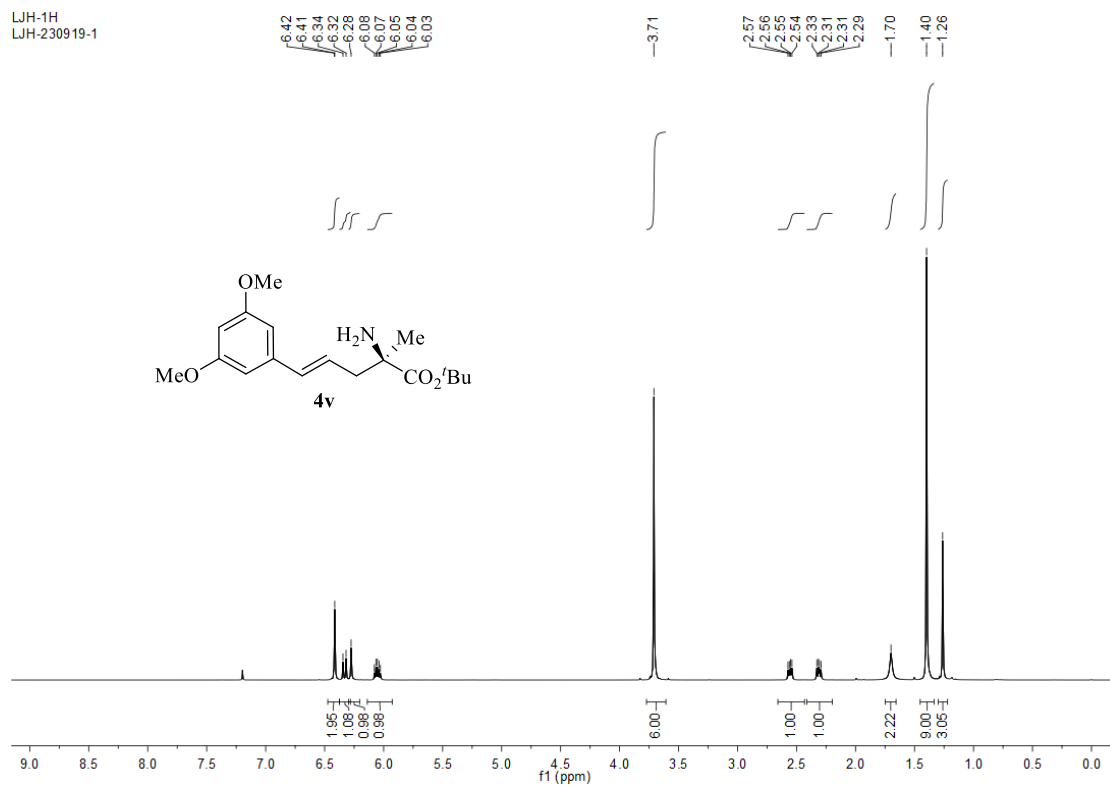

LJH-13C  
LJH-230919-1

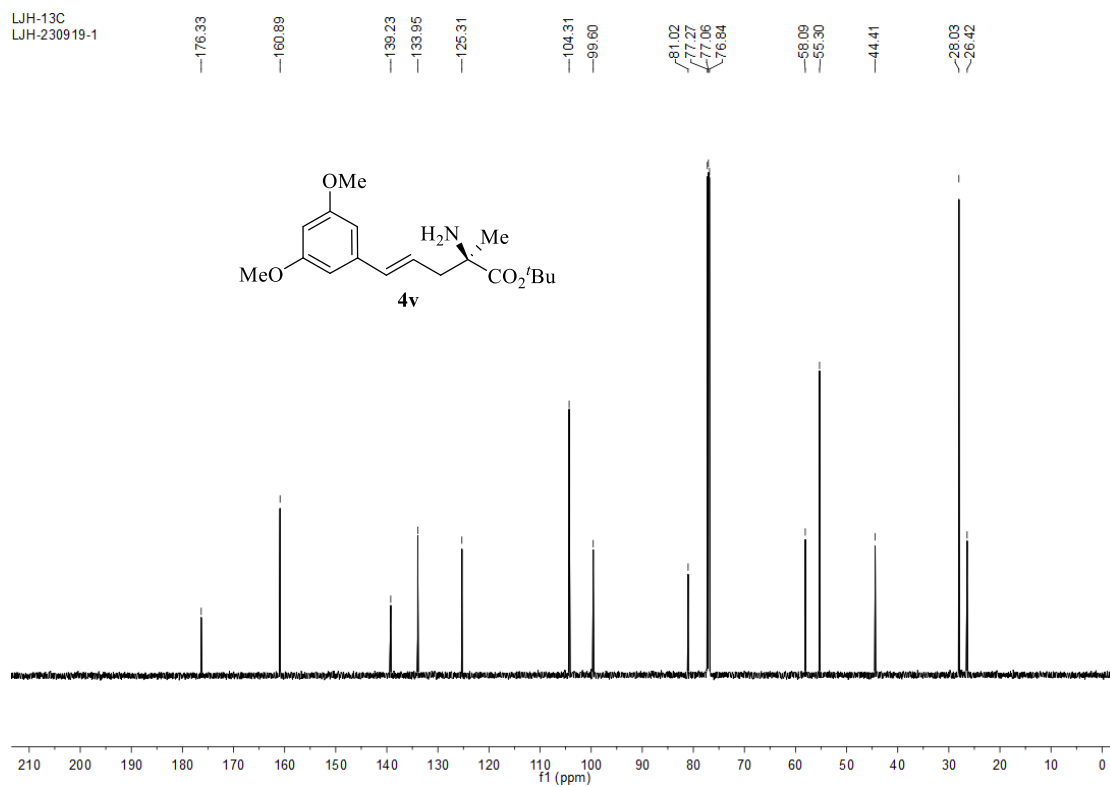

LJH-1H  
LJH-230918-1

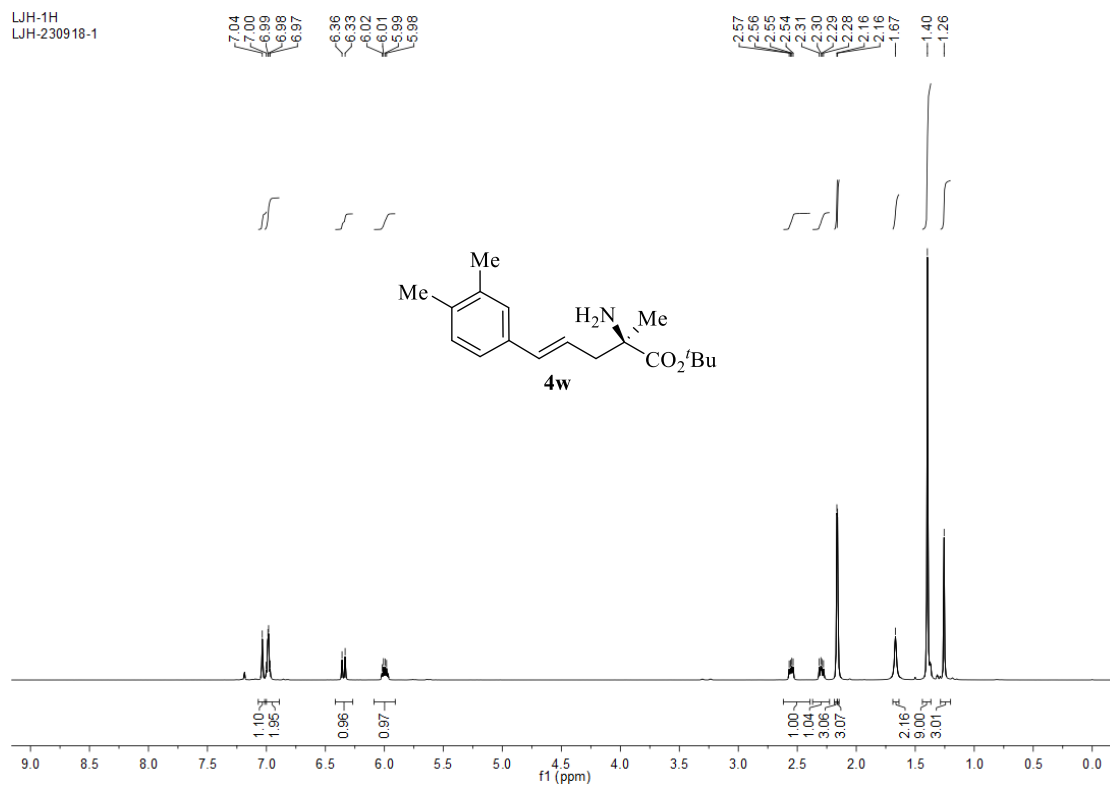

LJH-13C  
LJH-230918-1

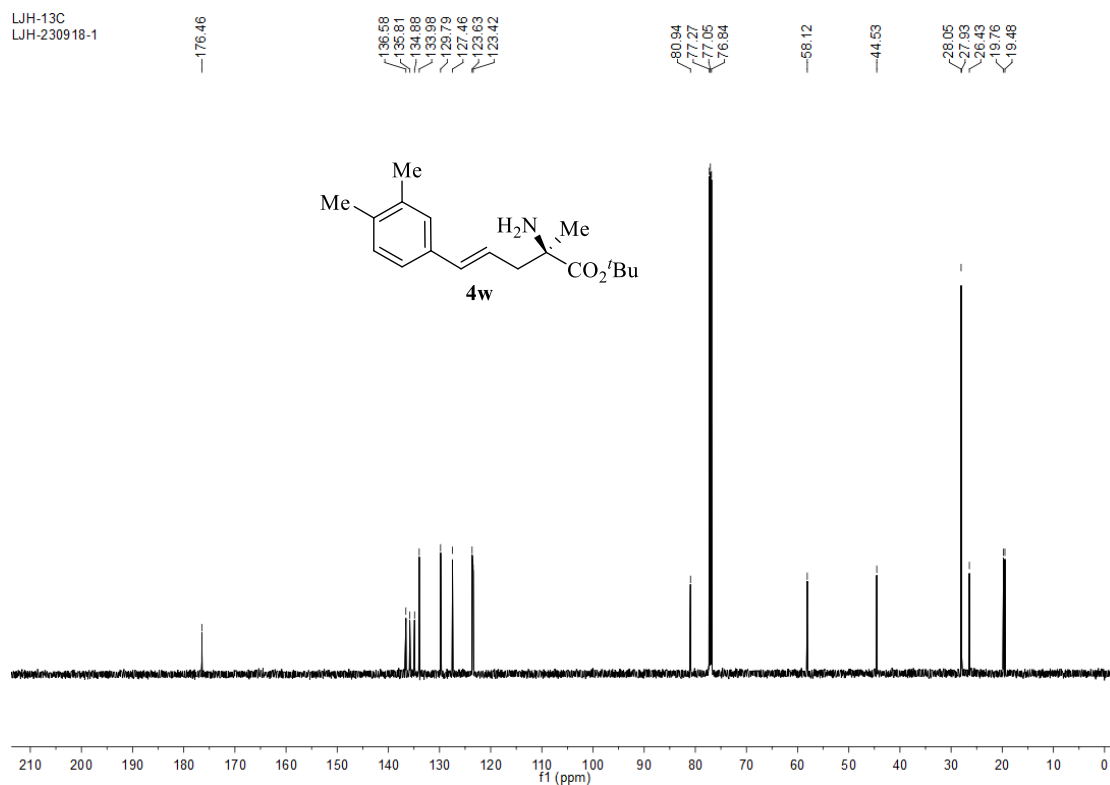

LJH-1H  
LJH-230925-1

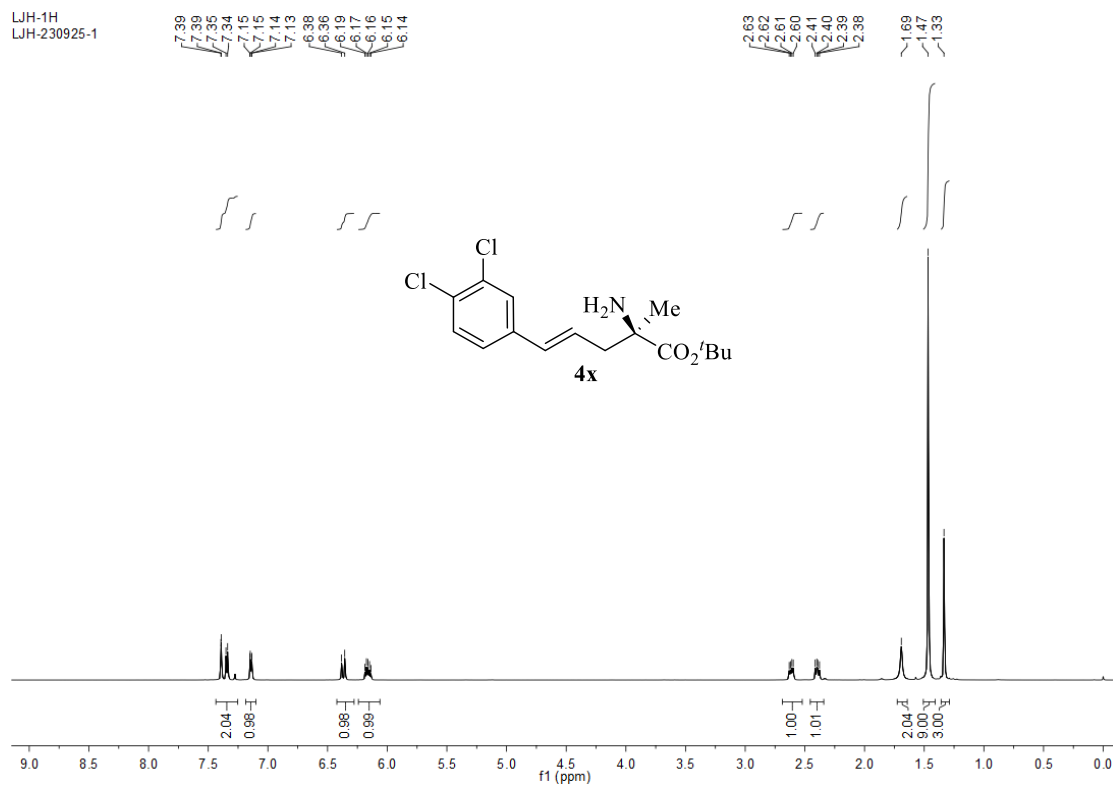

LJH-13C  
LJH-230925-1

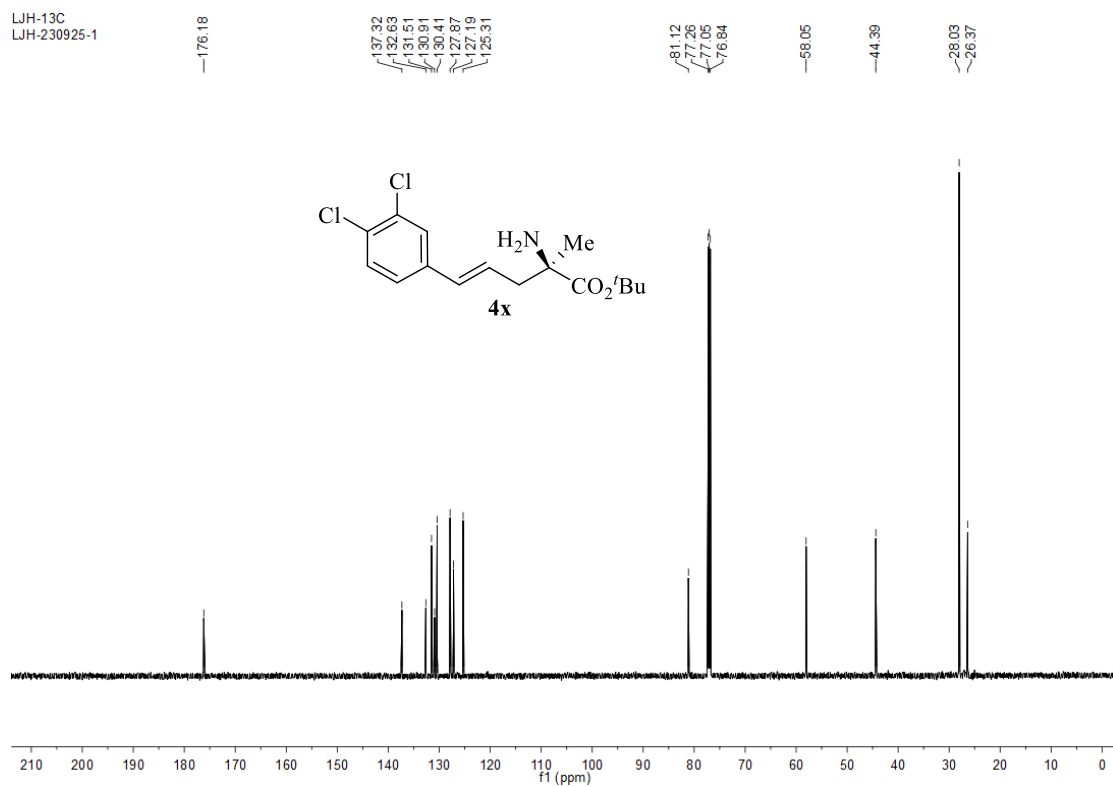

LJH-1H  
LJH-230909-1

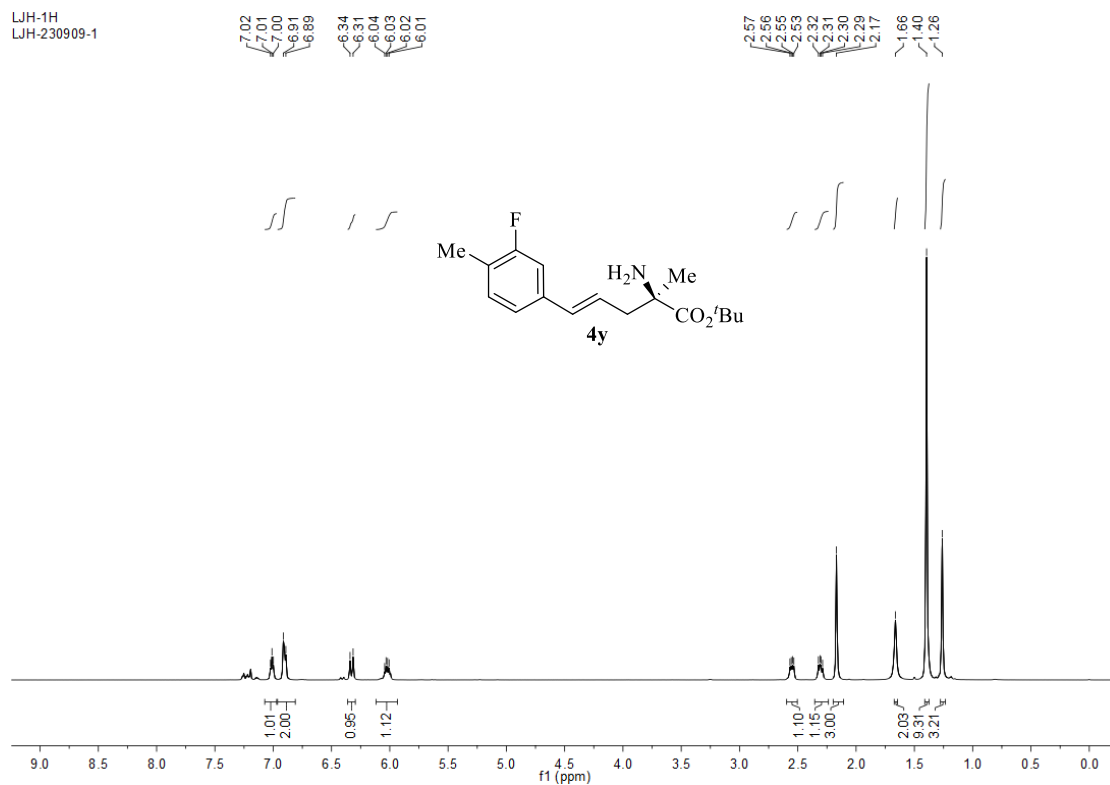

LJH-13C  
LJH-230909-1

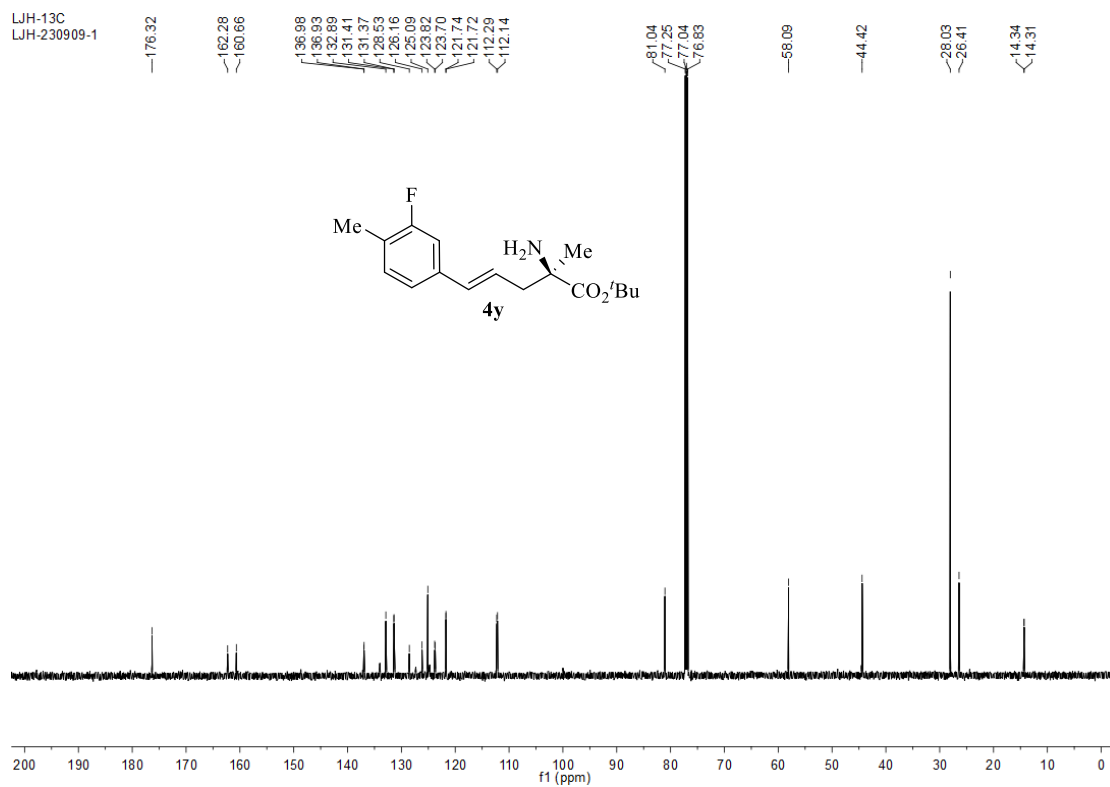

LJH-1H  
LJH-231016-1

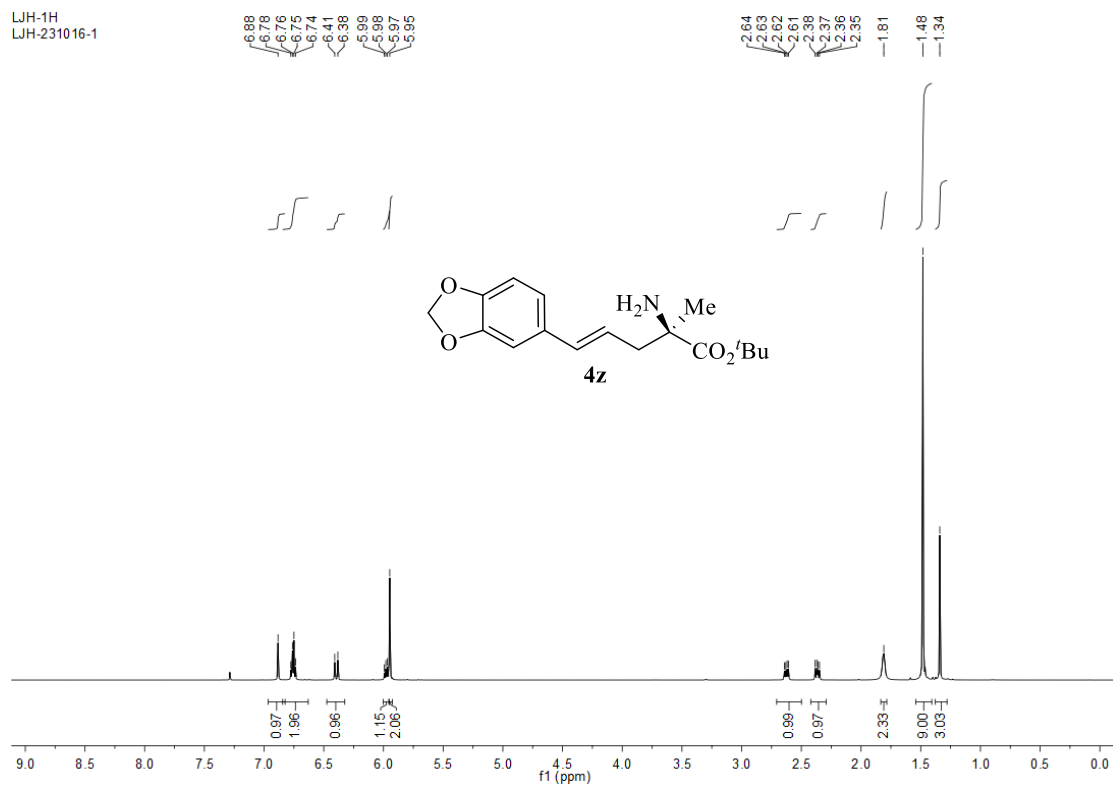

LJH-13C  
LJH-231016-1

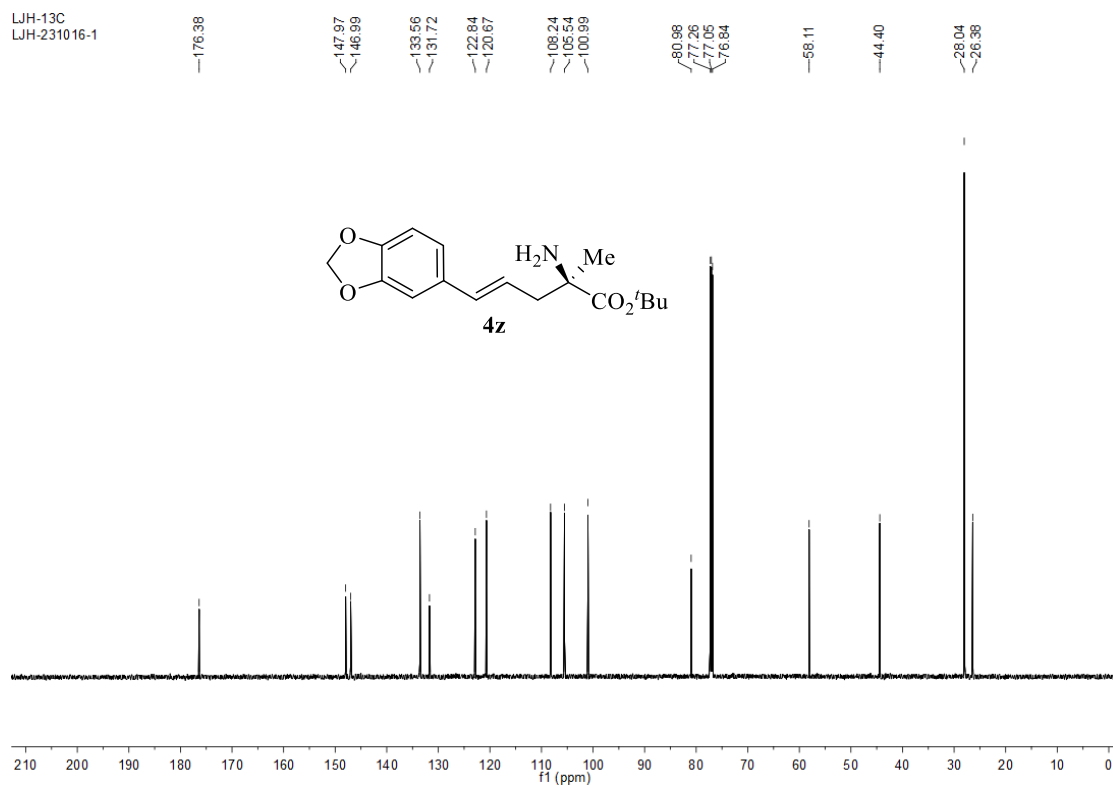



LJH-1H  
LJH-231106-2

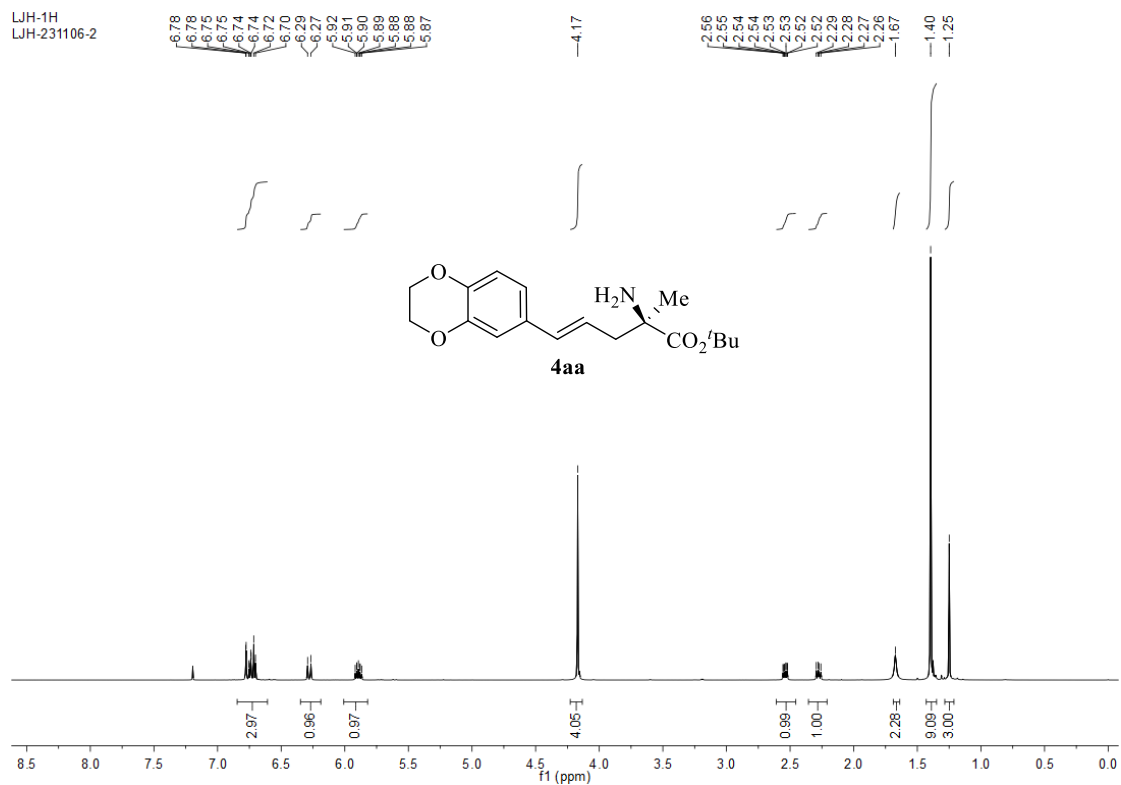

LJH-13C  
LJH-231106-2

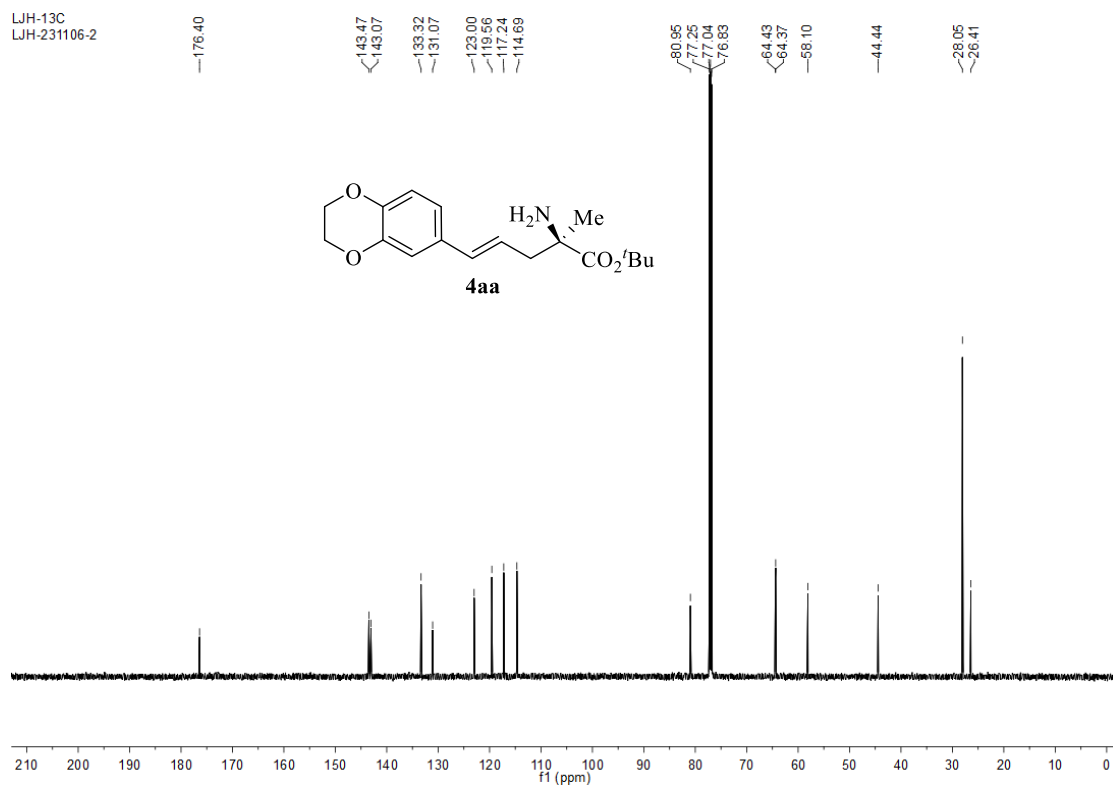

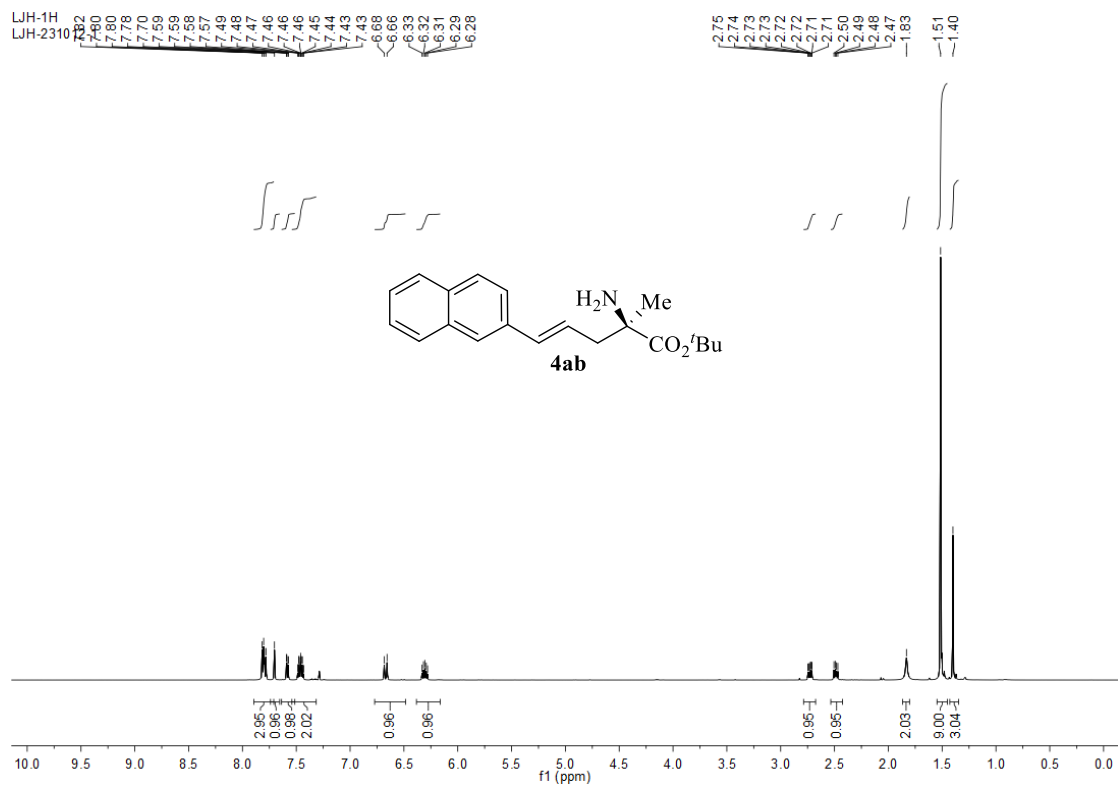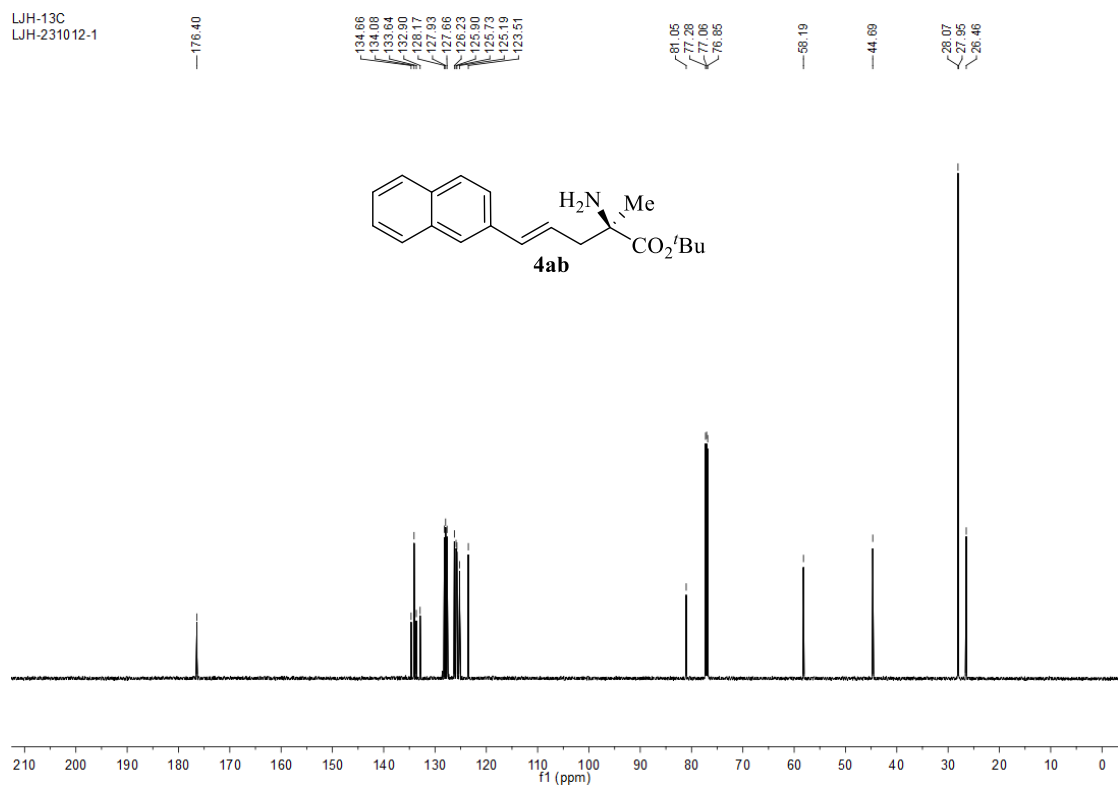

LJH-1H  
LJH-240116-2

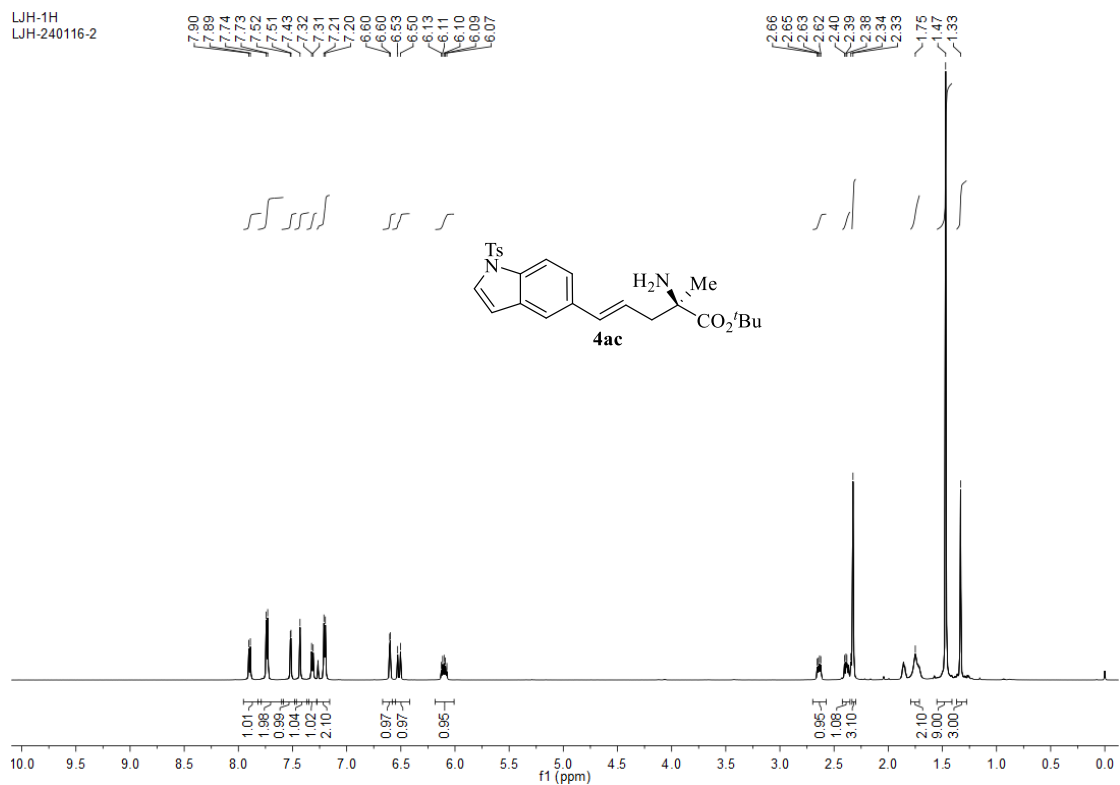

LJH-1H  
LJH-240116-2

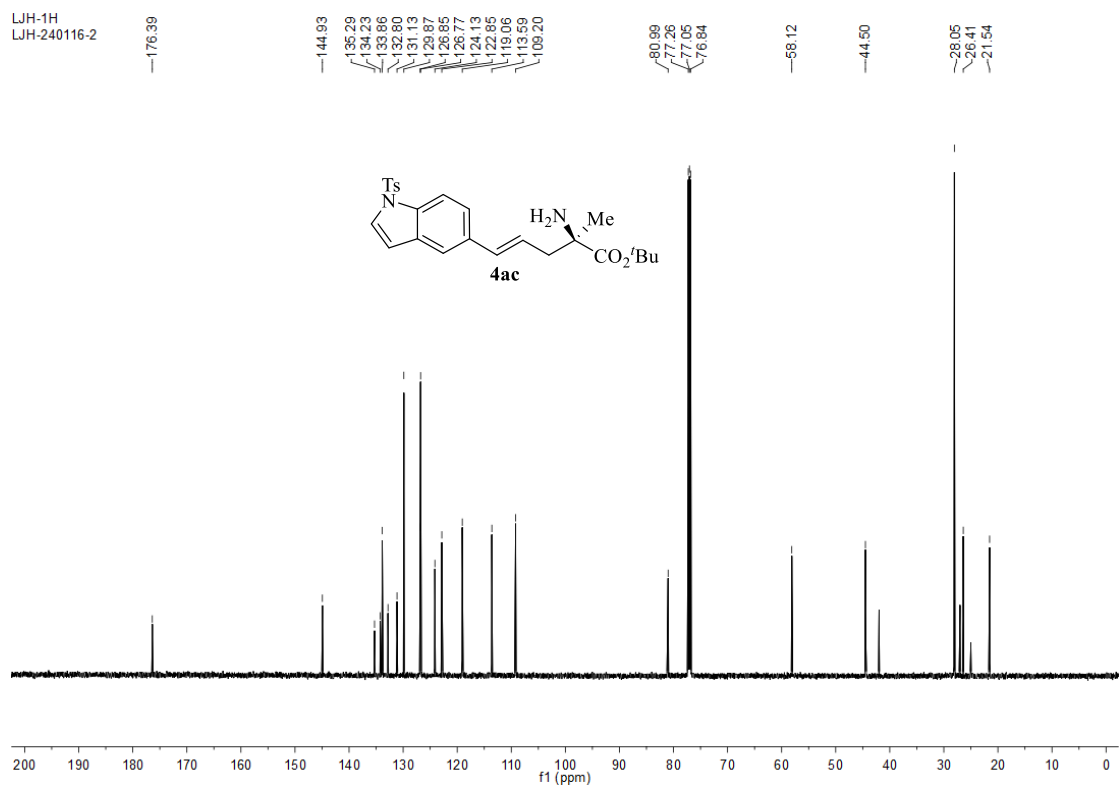

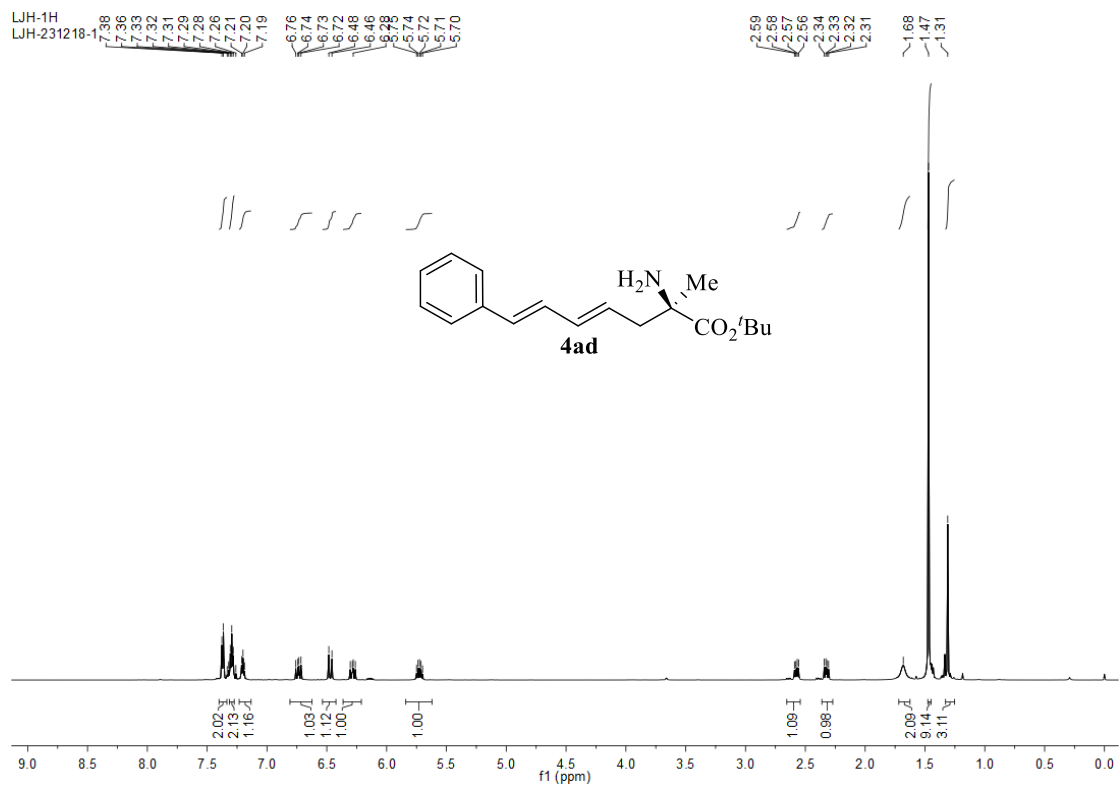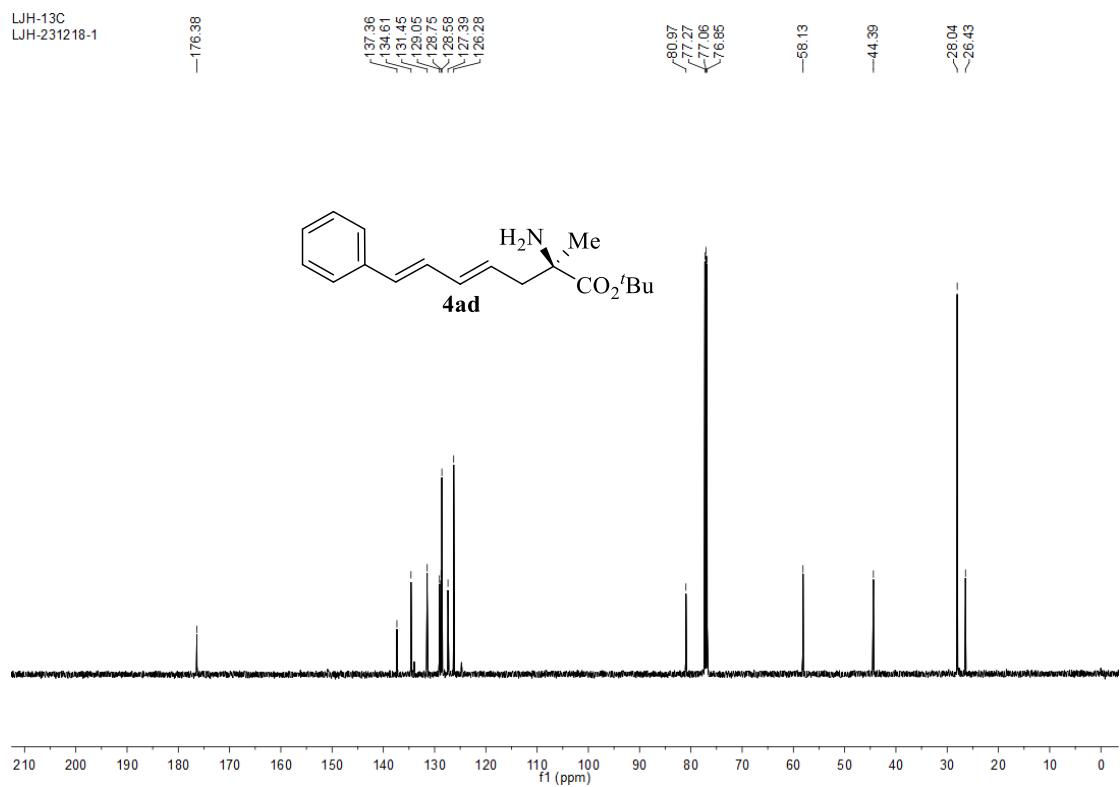

LJH-1H  
LJH-240109-1

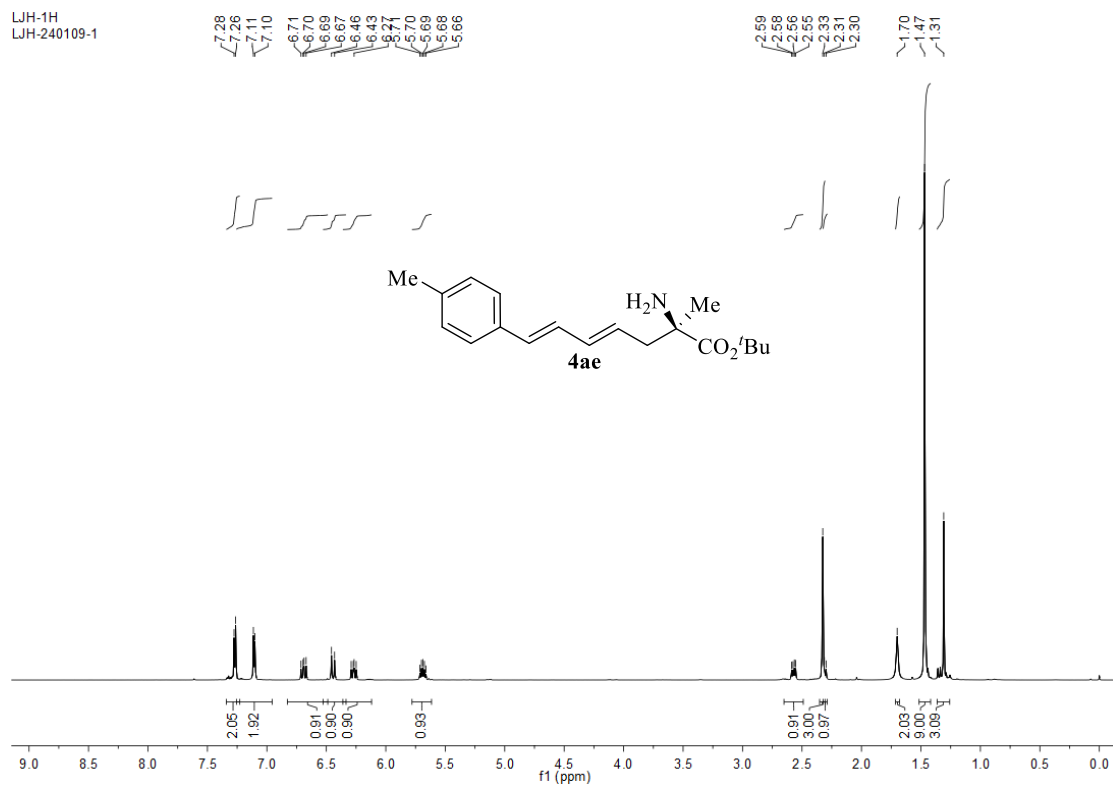

LJH-13C  
LJH-240109-1

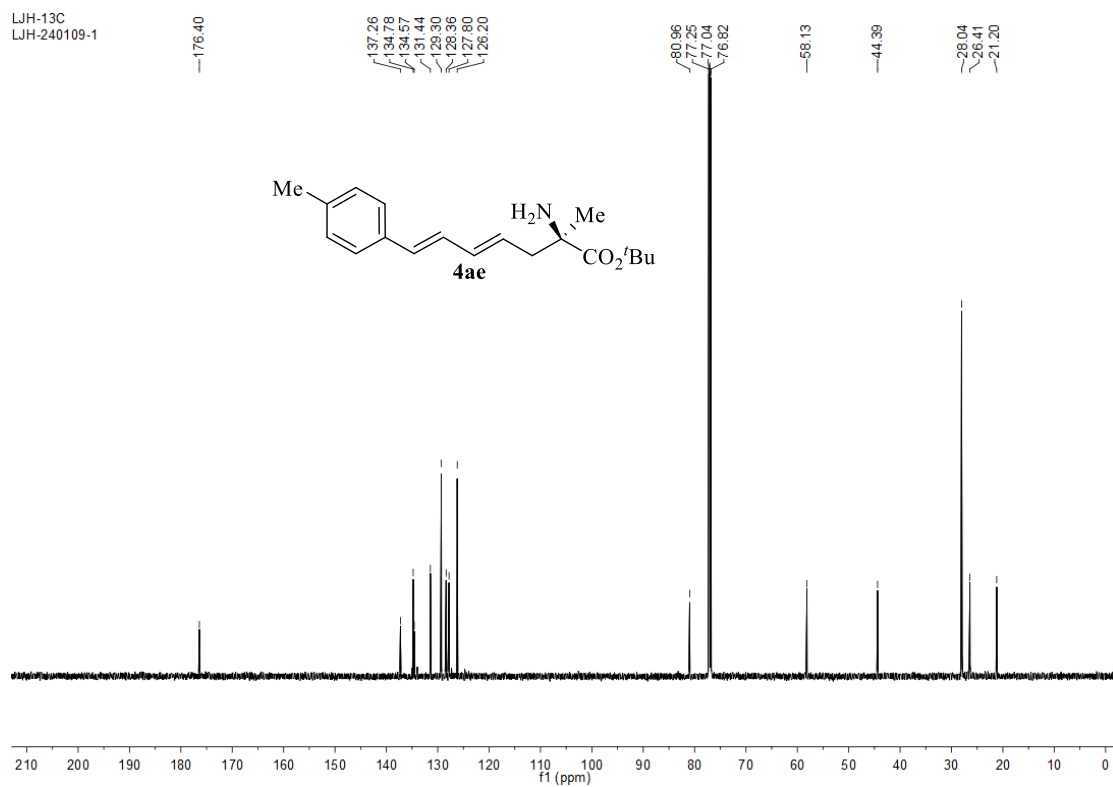

LJH-1H  
LJH-240102-1

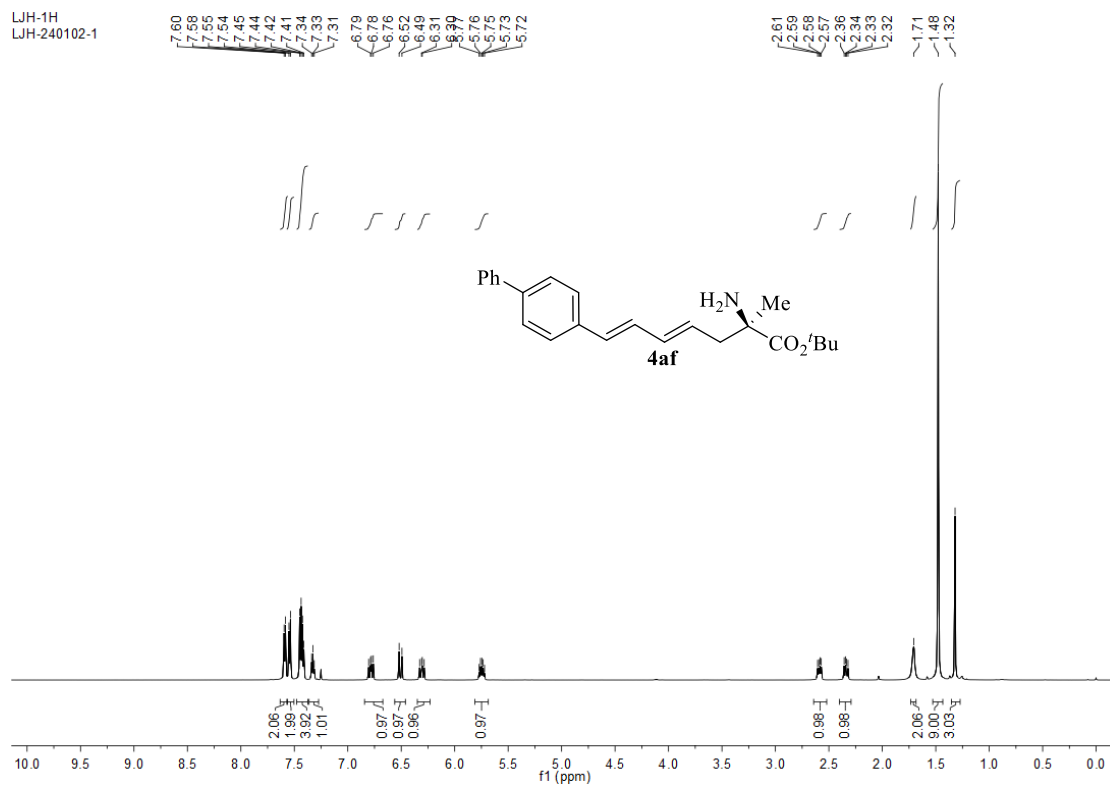

LJH-13C  
LJH-240102-1

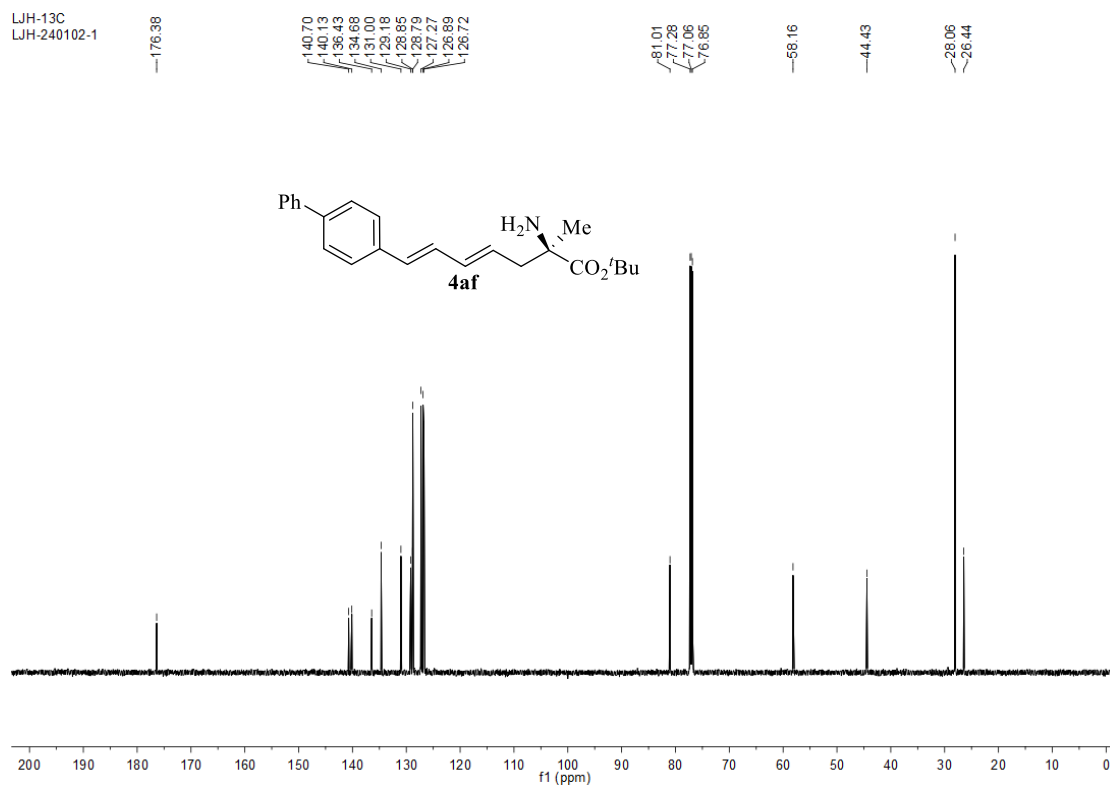

LJH-1H  
LJH-240105-1

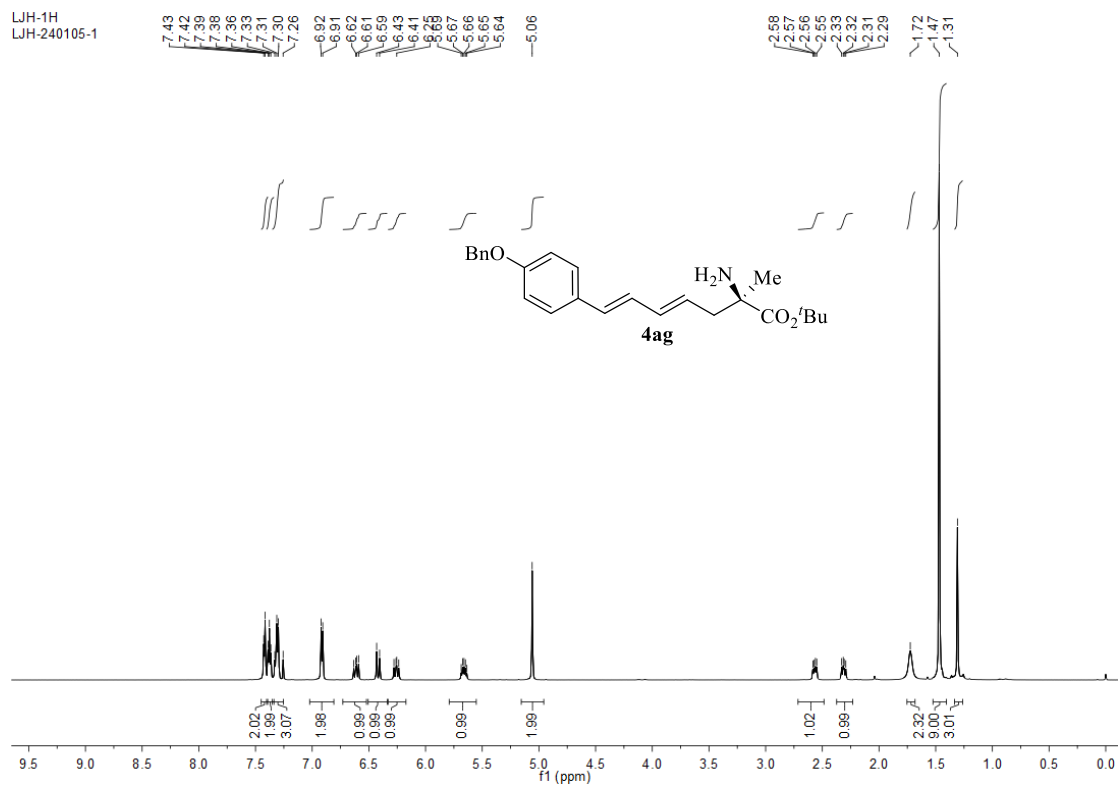

LJH-13C  
LJH-240105-1

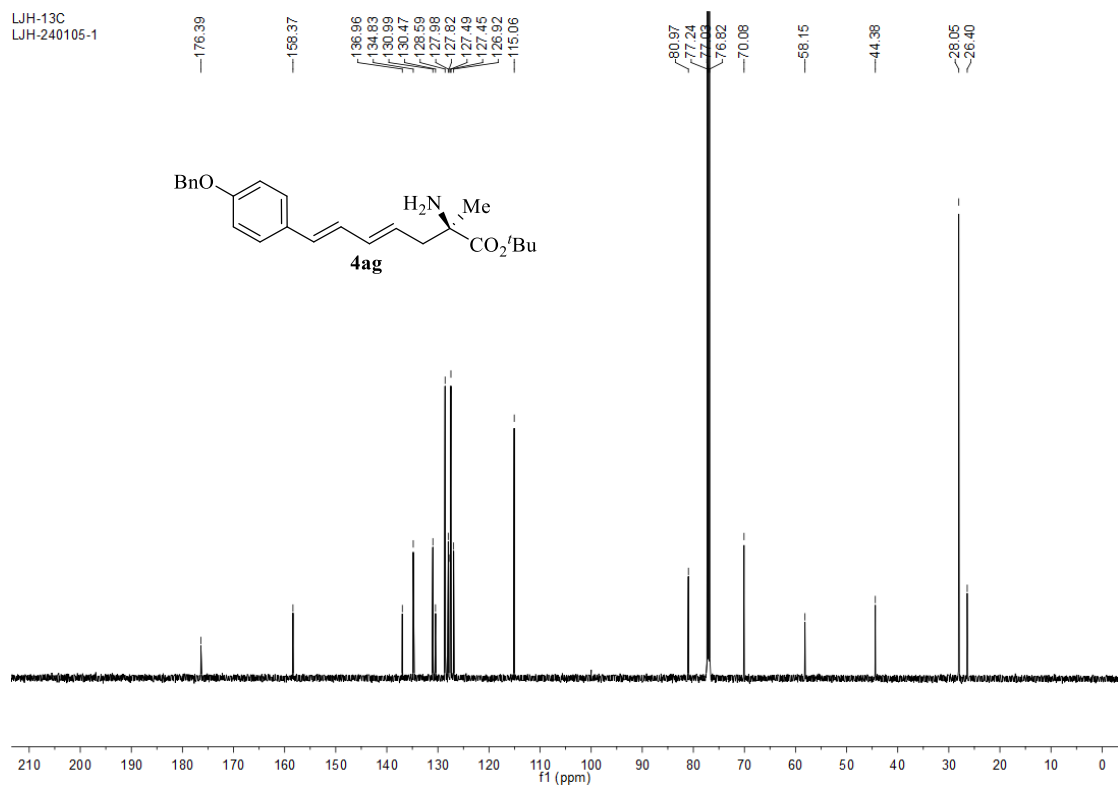

LJH-1H  
LJH-231112-1

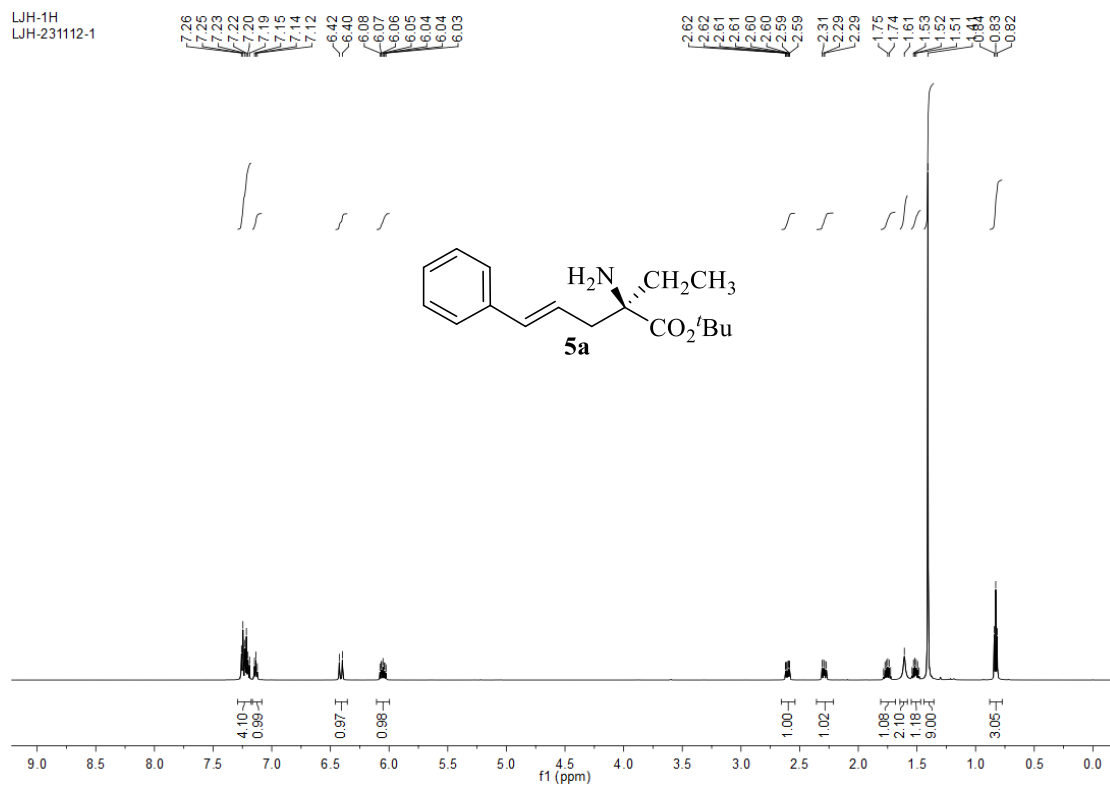

LJH-13C  
LJH-231112-1

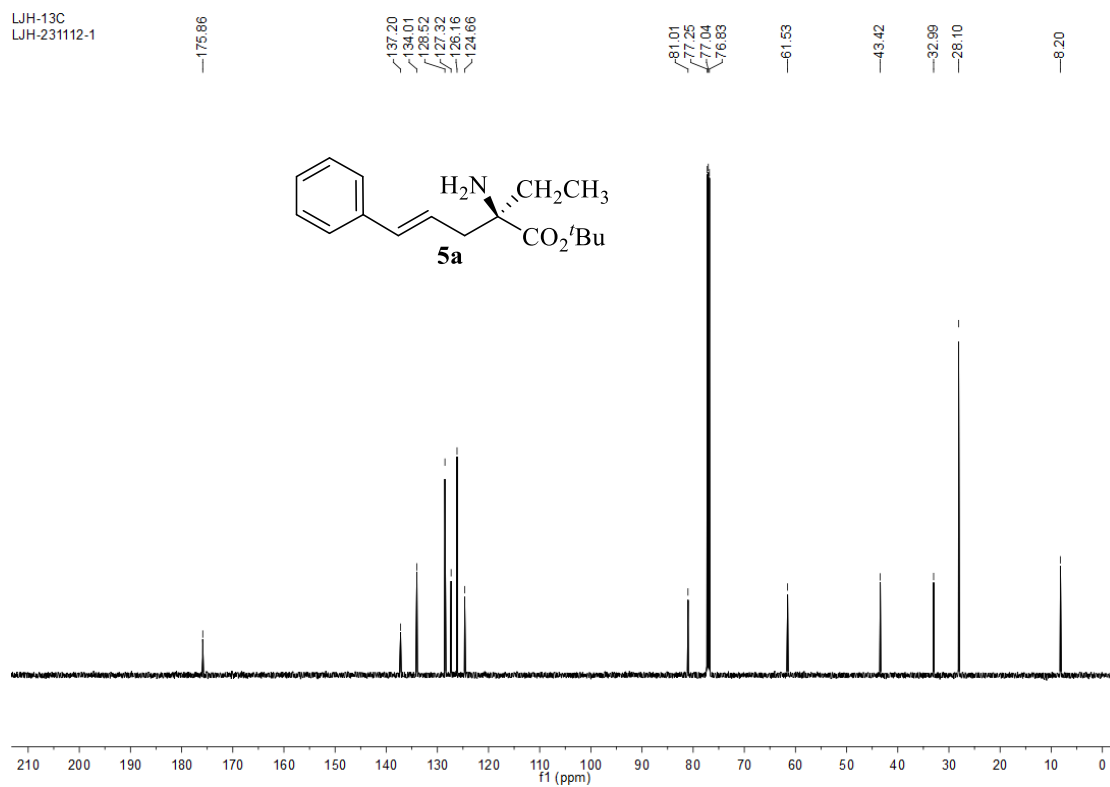



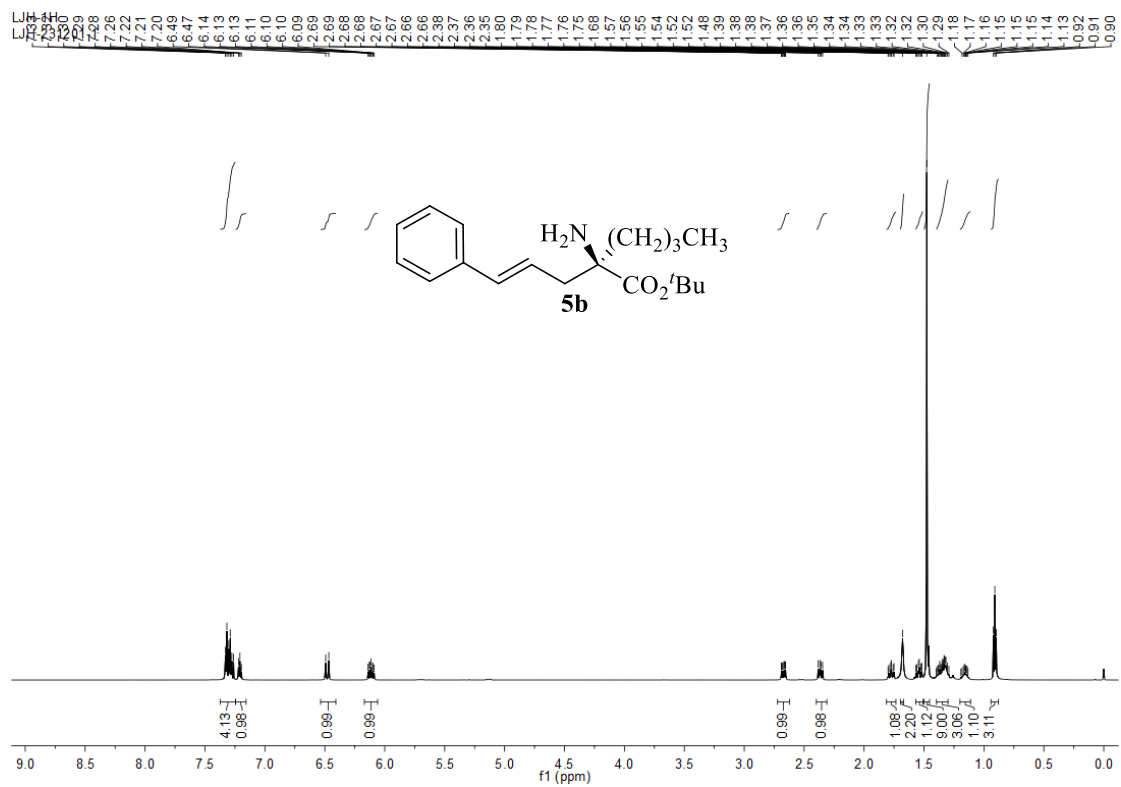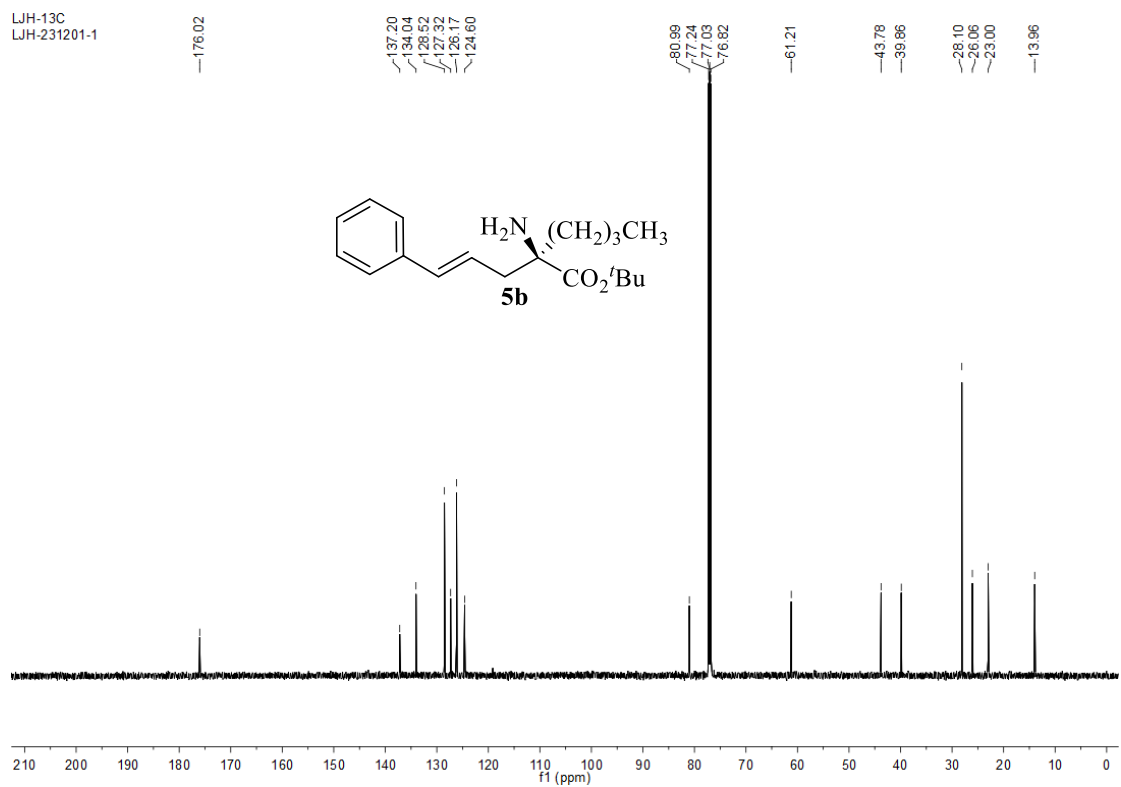

LJH-1H  
LJH-231126-1

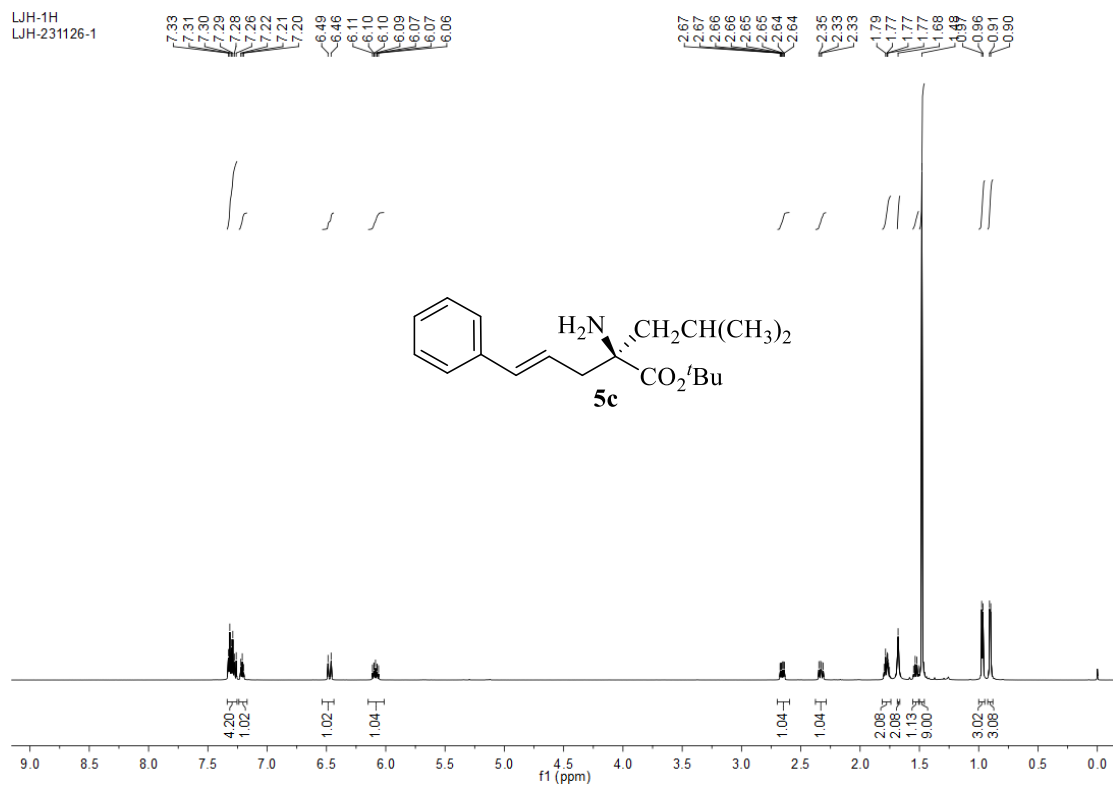

LJH-13C  
LJH-231126-1

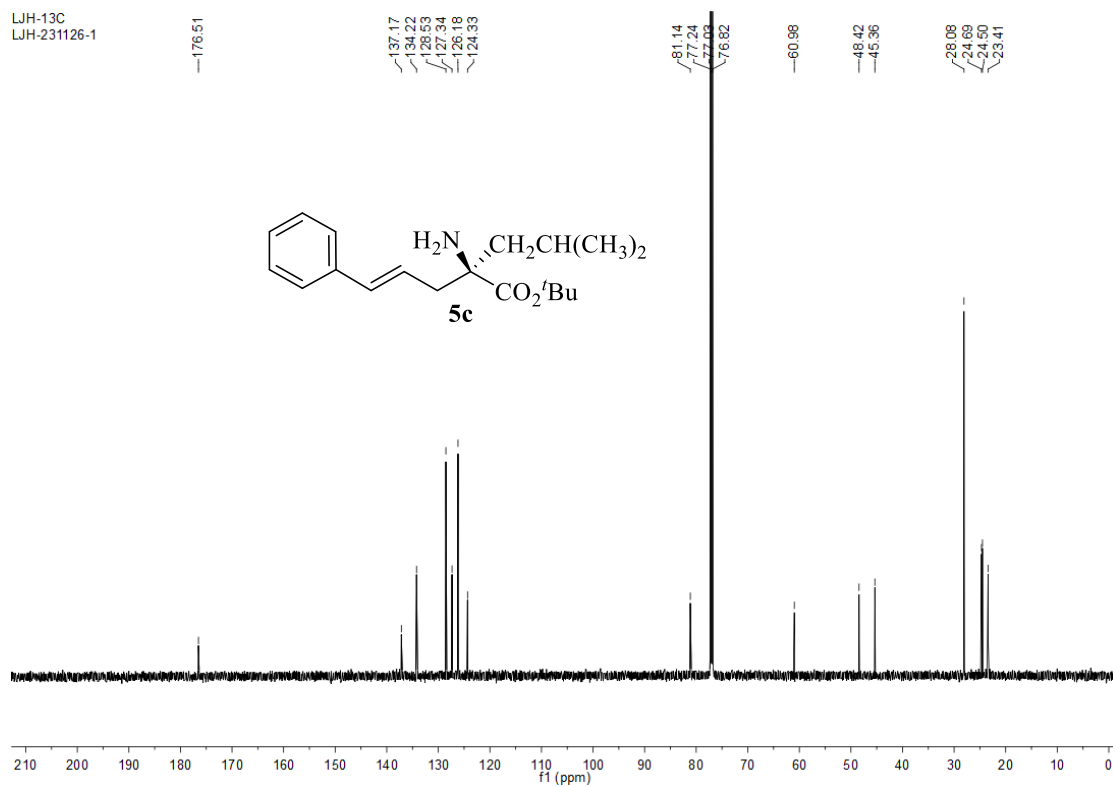

LJH-1H  
LJH-231228-1

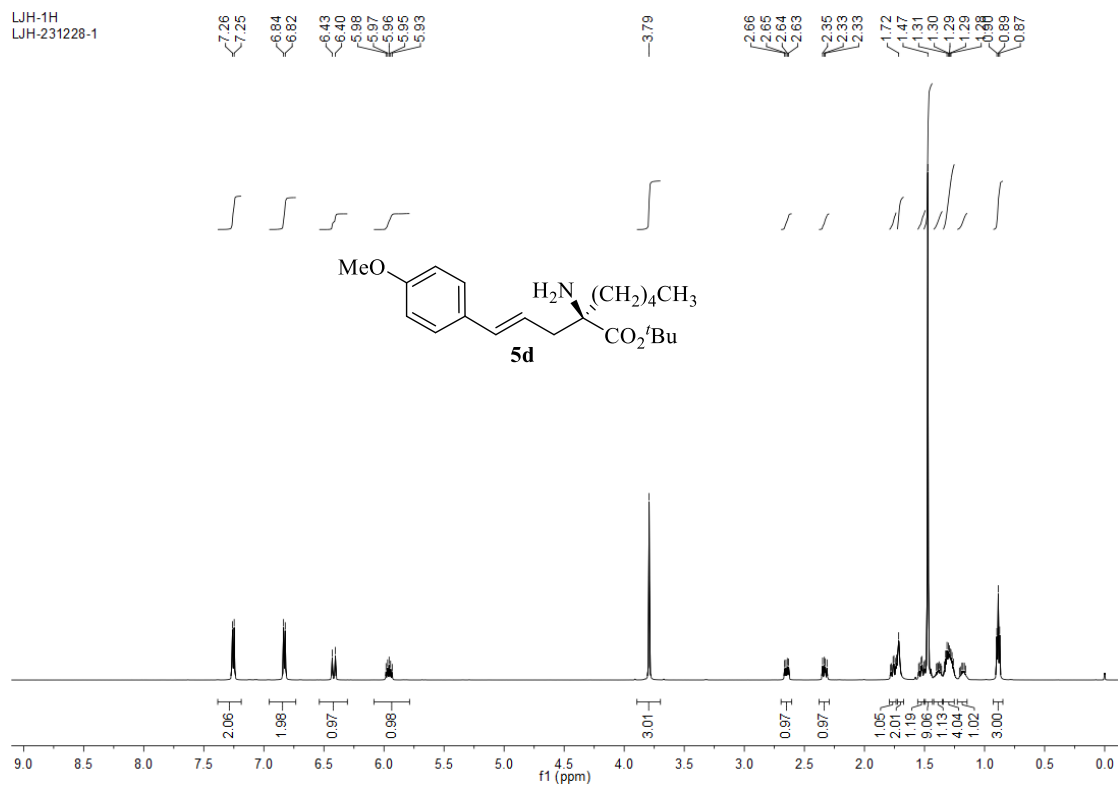

LJH-13C  
LJH-231228-1

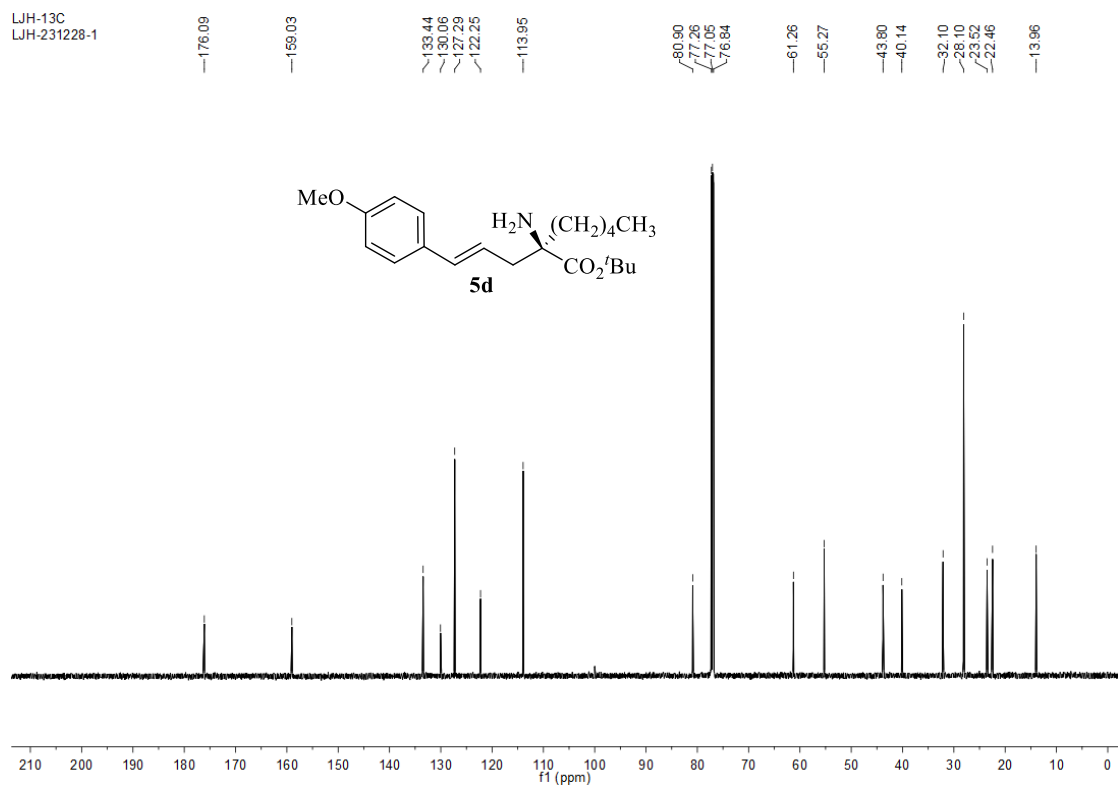

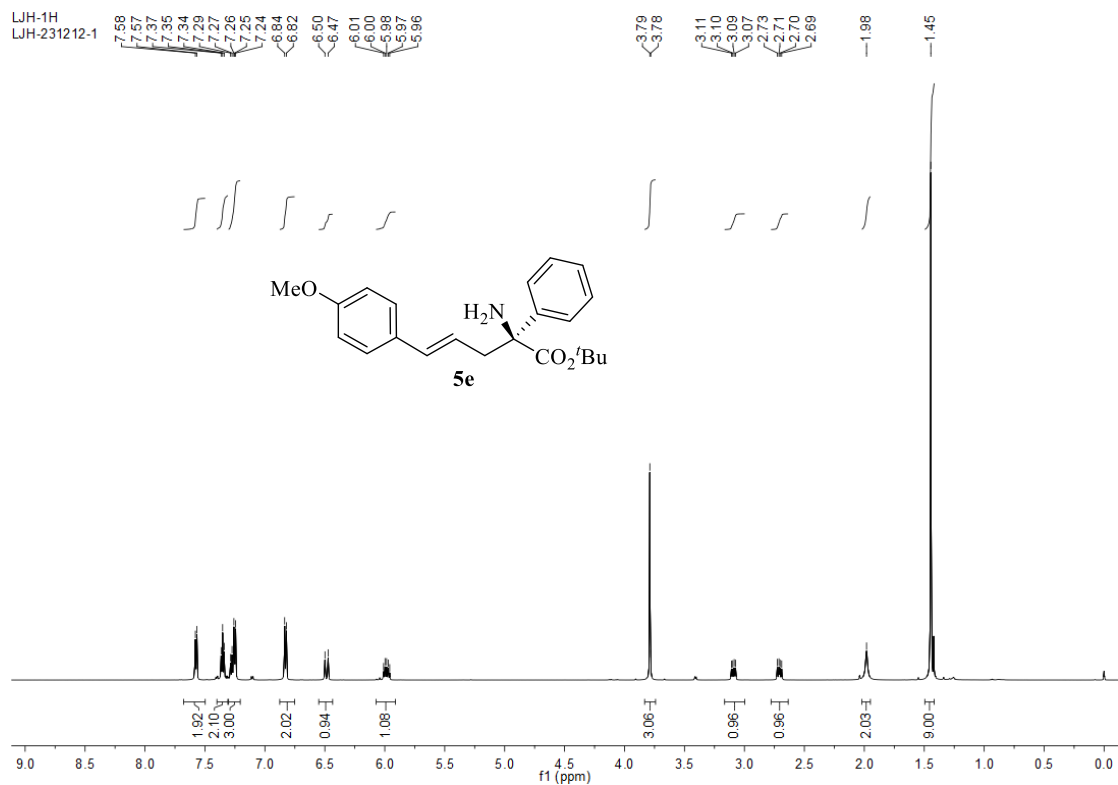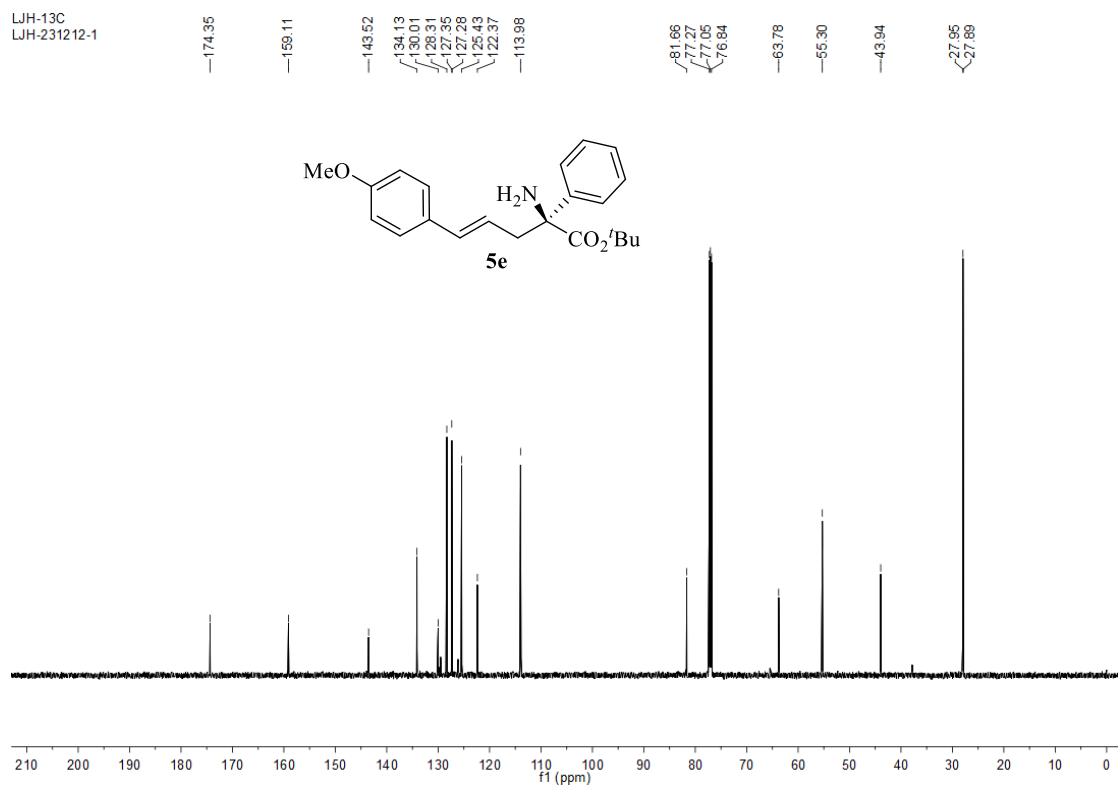

LJH-1H  
LJH-231220-1

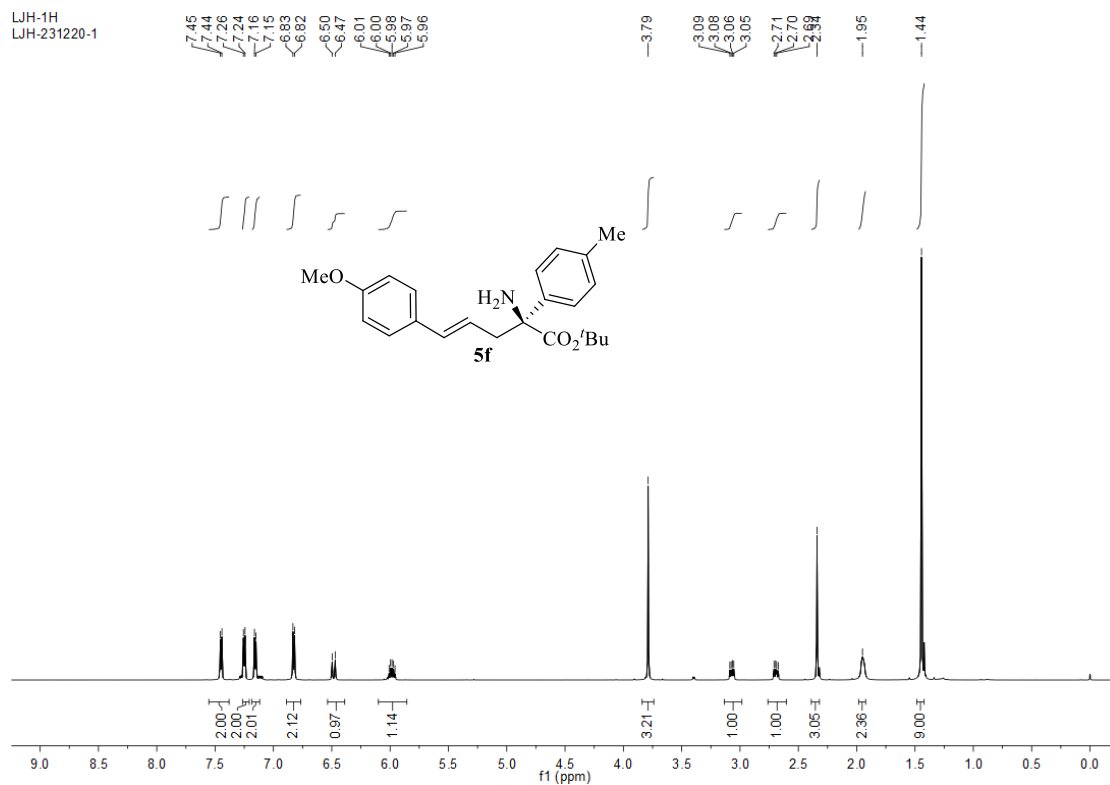

LJH-13C  
LJH-231220-1

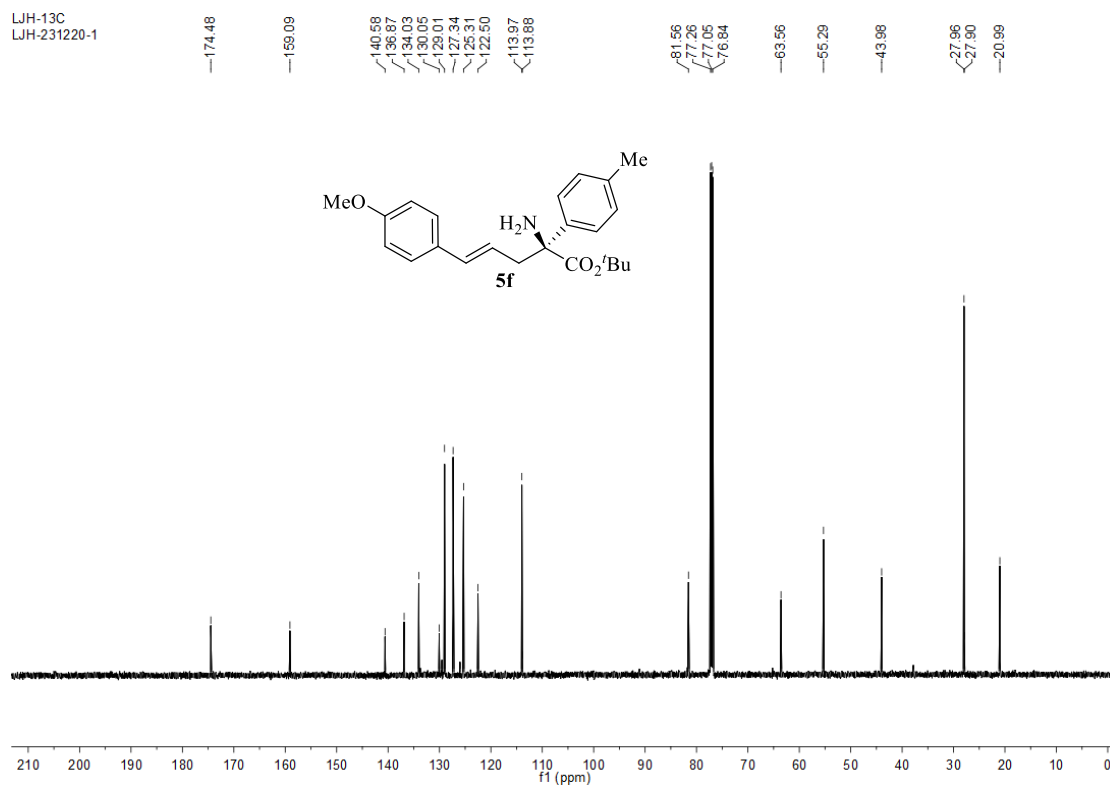

LJH-1H  
LJH-231225-1

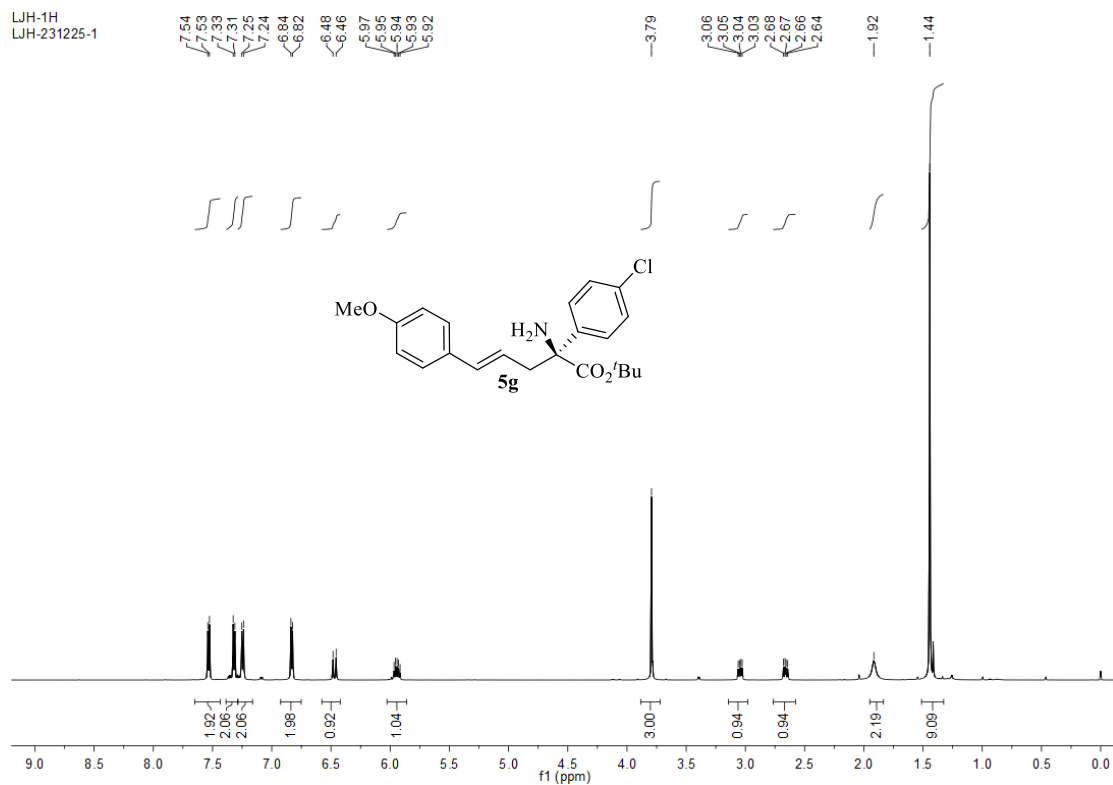

LJH-13C  
LJH-231225-1

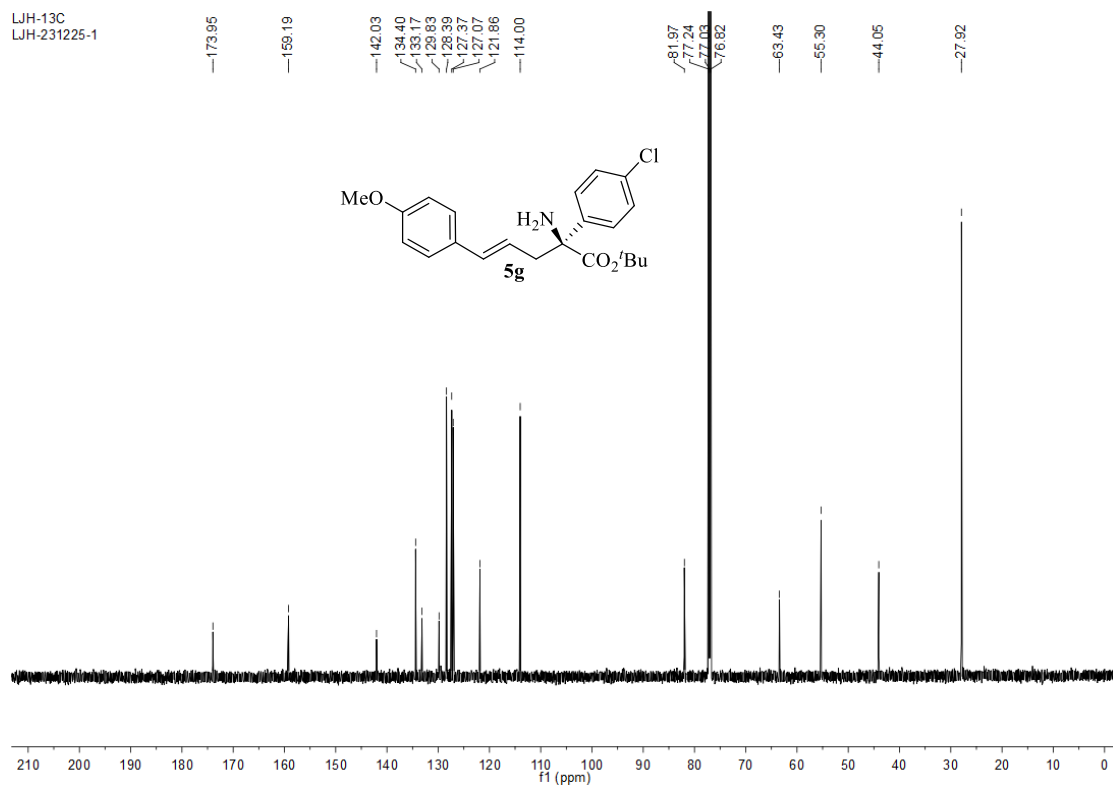

LJH-1H  
LJH-231205-2

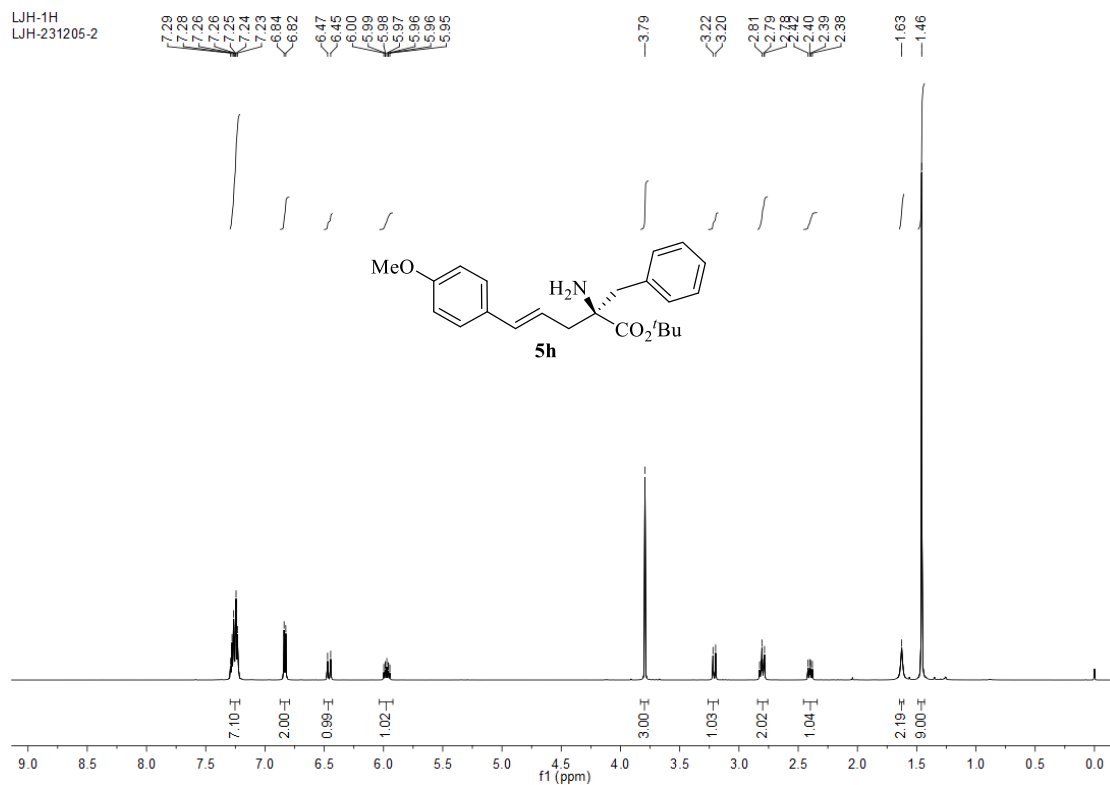

LJH-13C  
LJH-231205-2

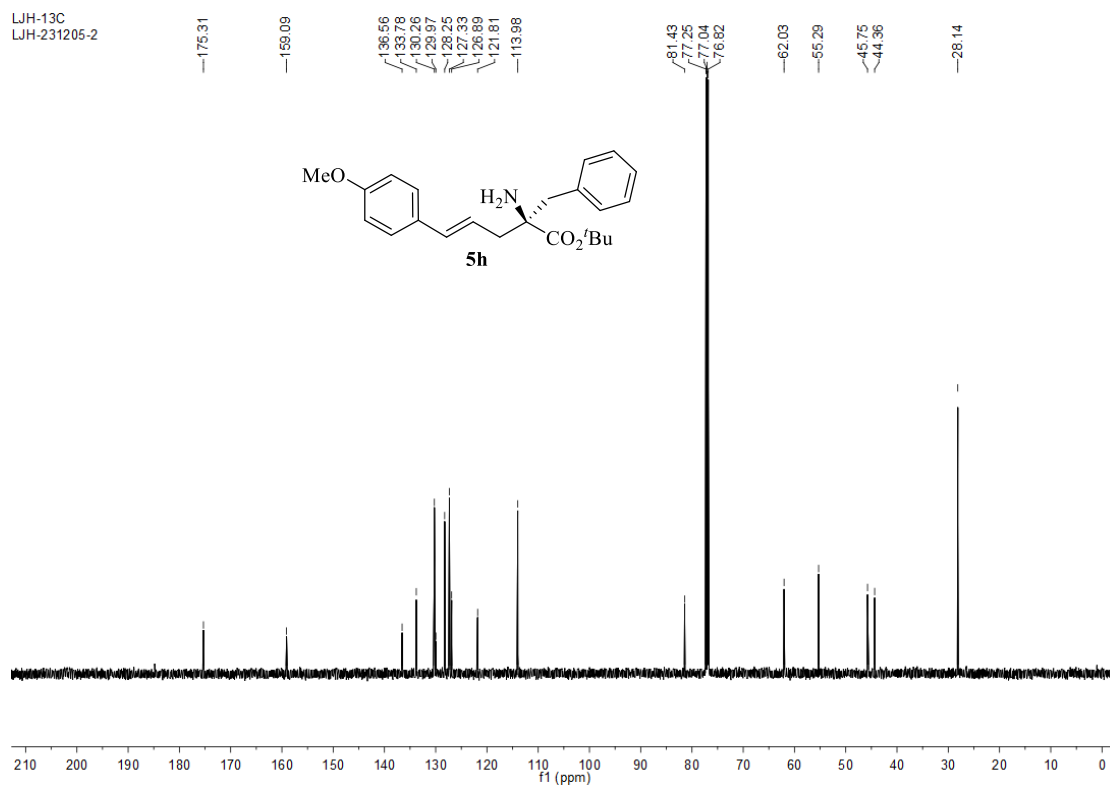

LJH-1H  
LJH-231227-1

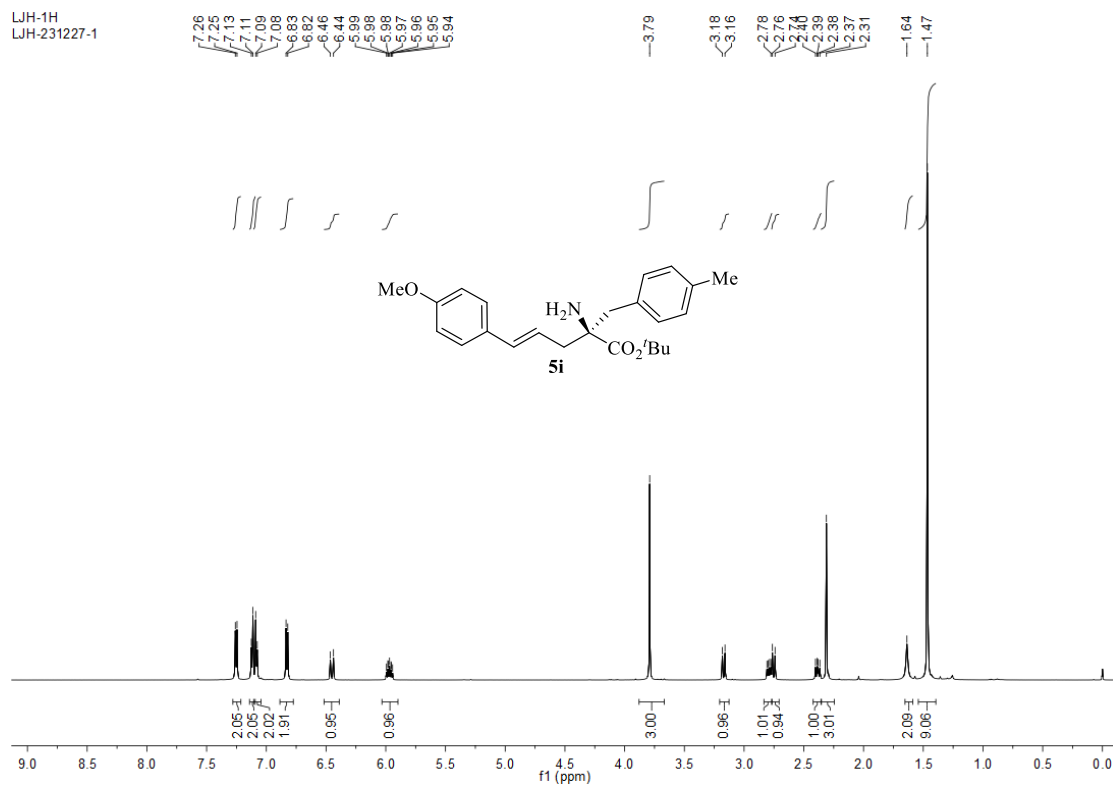

LJH-13C  
LJH-231227-1

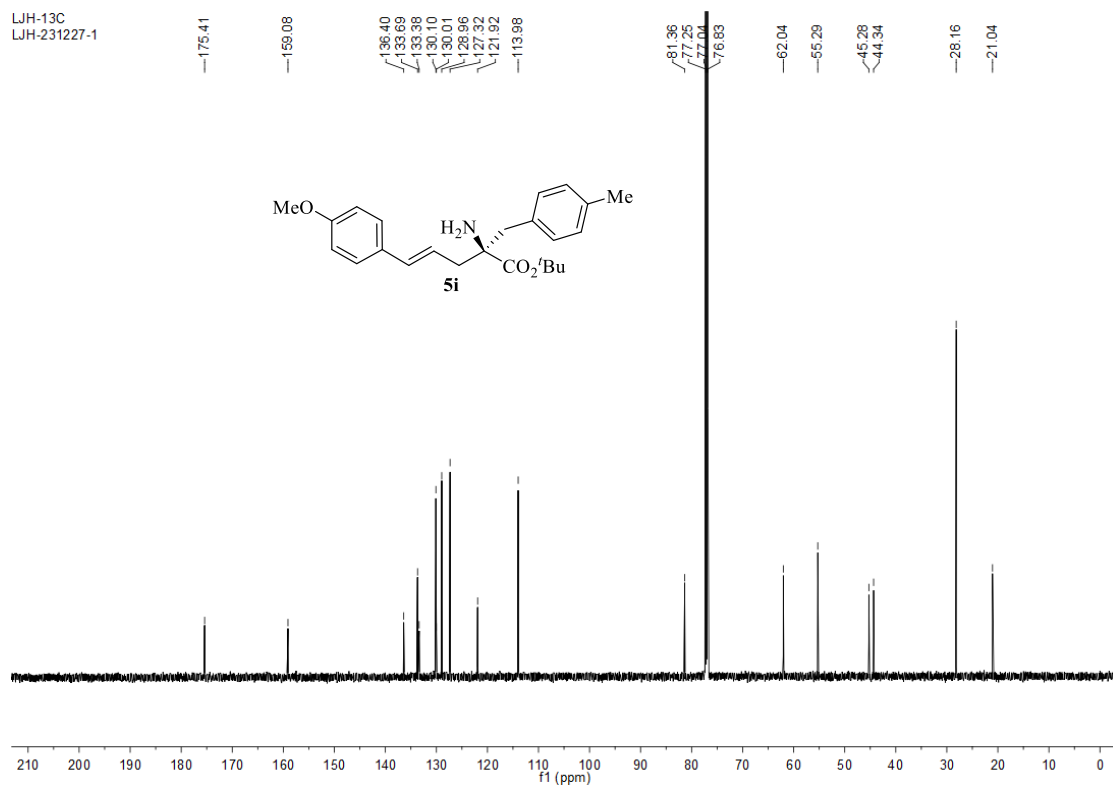



LJH-1H  
LJH-231222-1

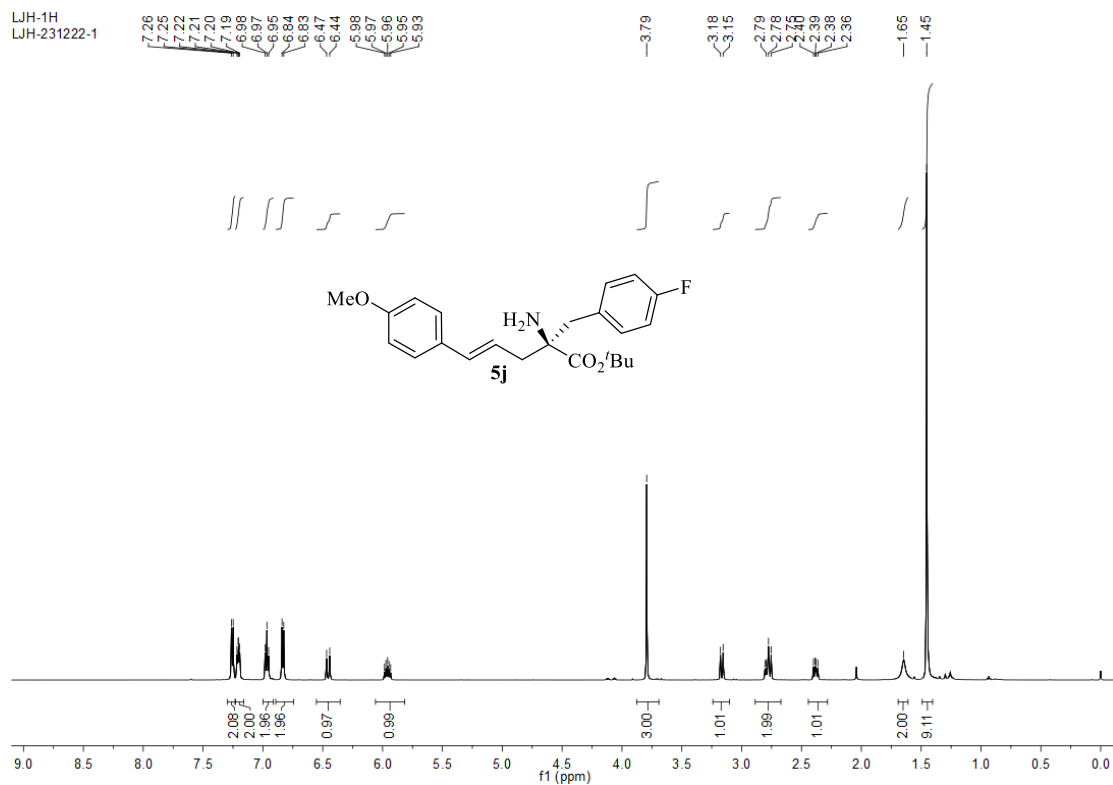

LJH-13C  
LJH-231222-1

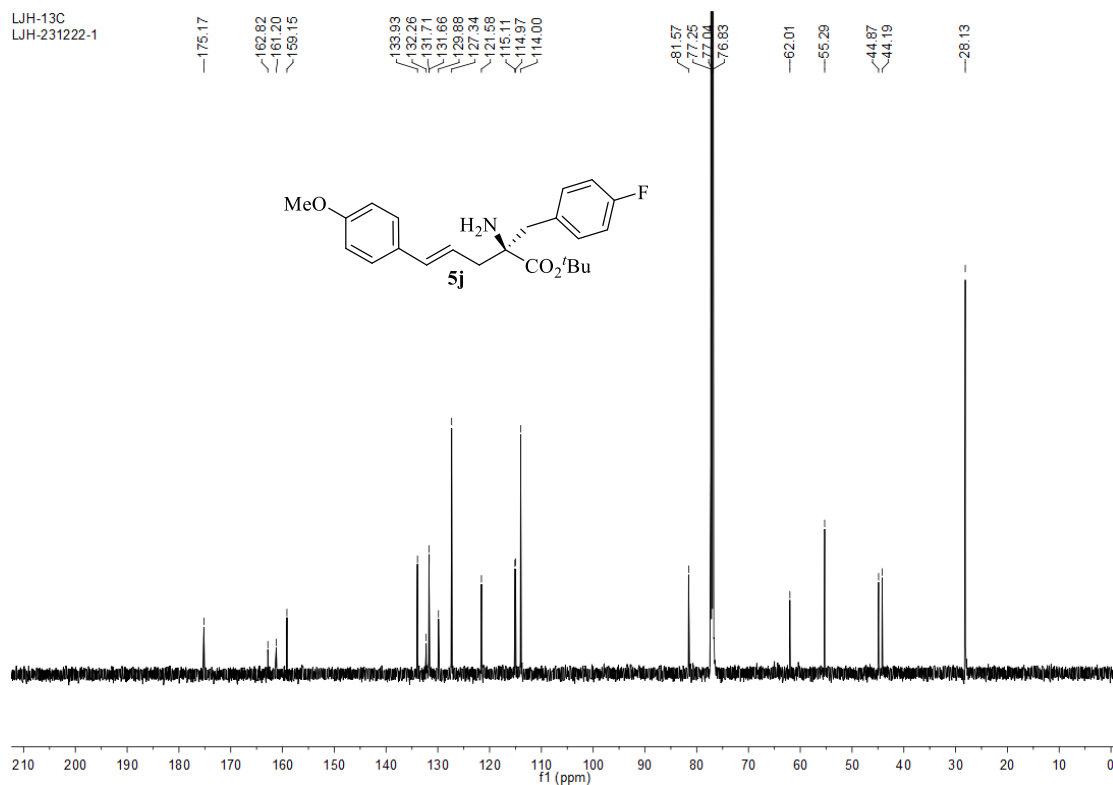

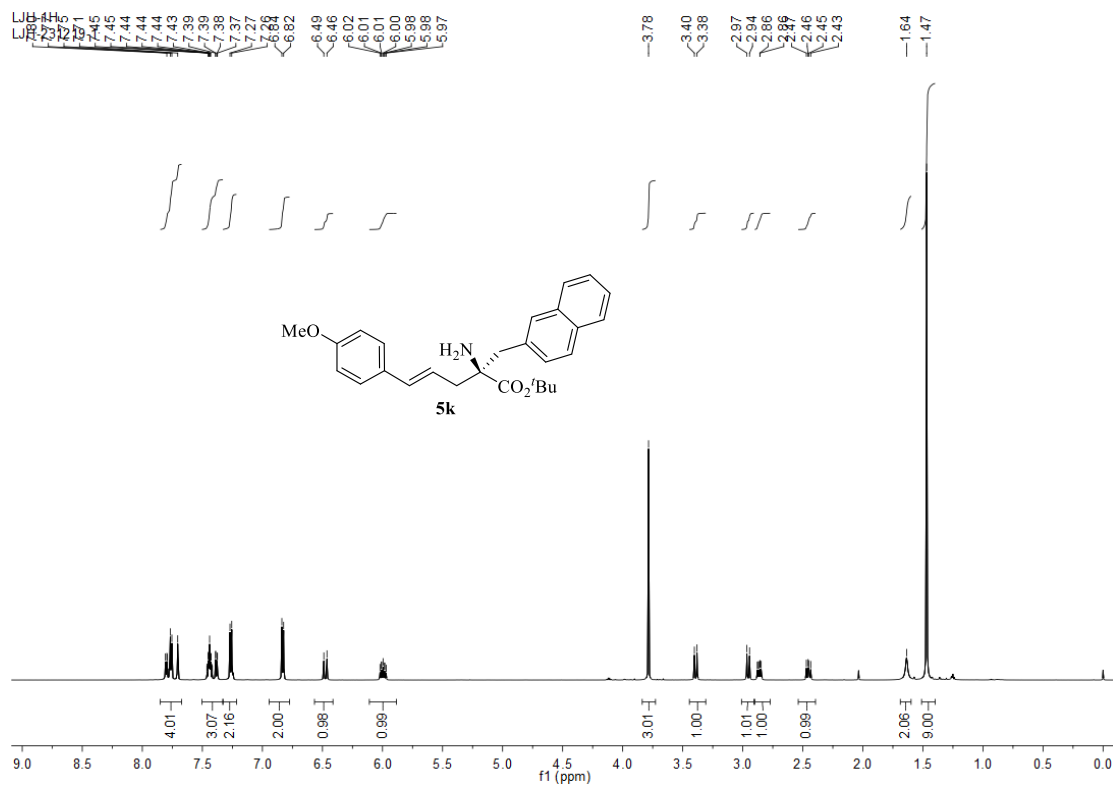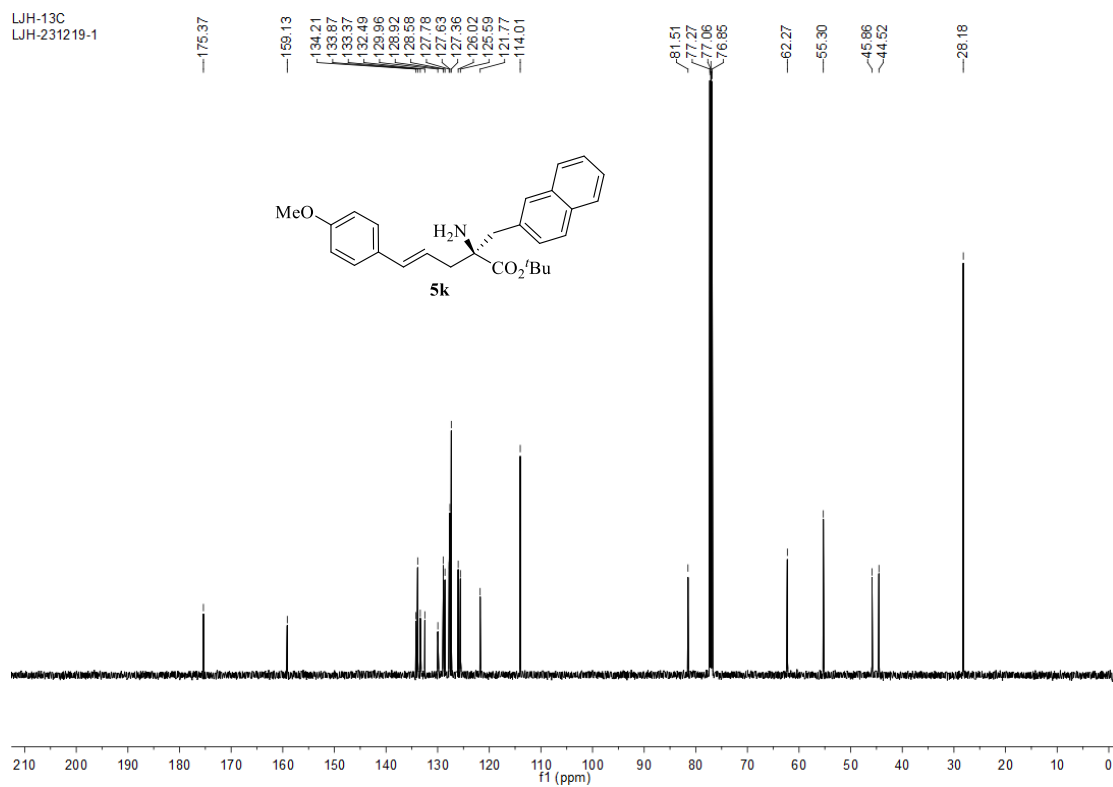

LJH-1H  
LJH-231129-1

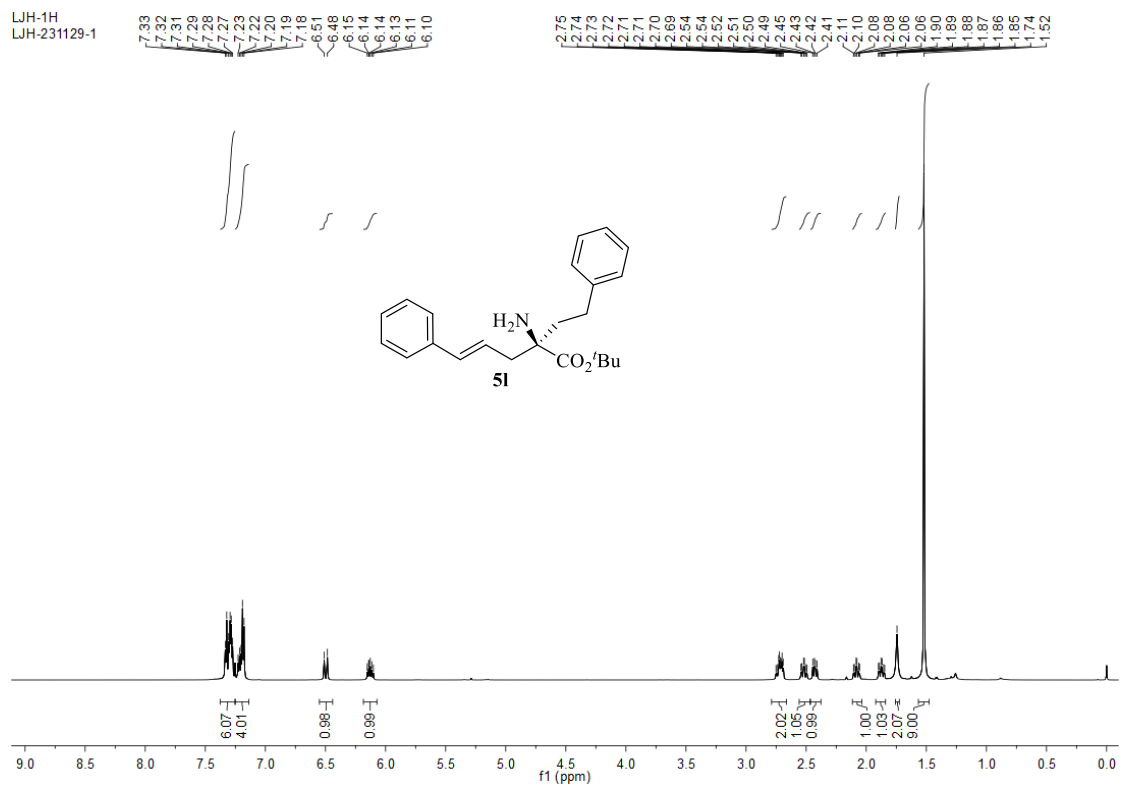

LJH-13C  
LJH-231129-1

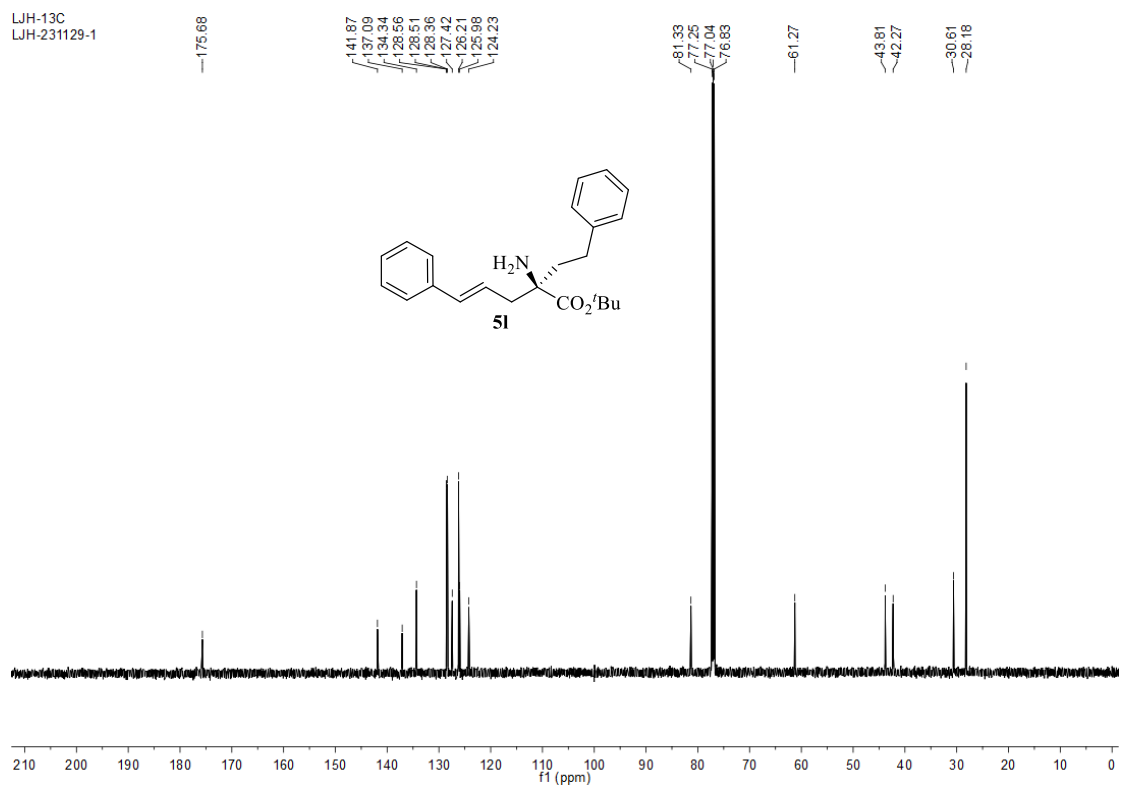

LJH-1H  
LJH-231208-1

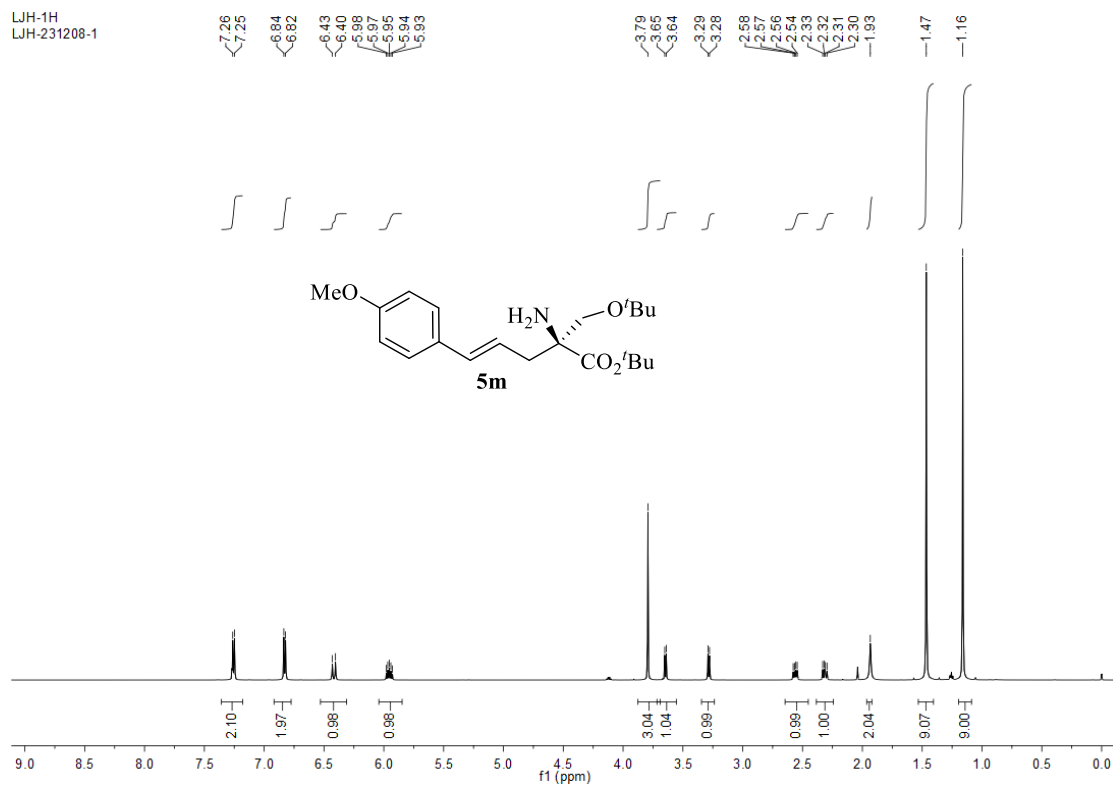

LJH-13C  
LJH-231208-1

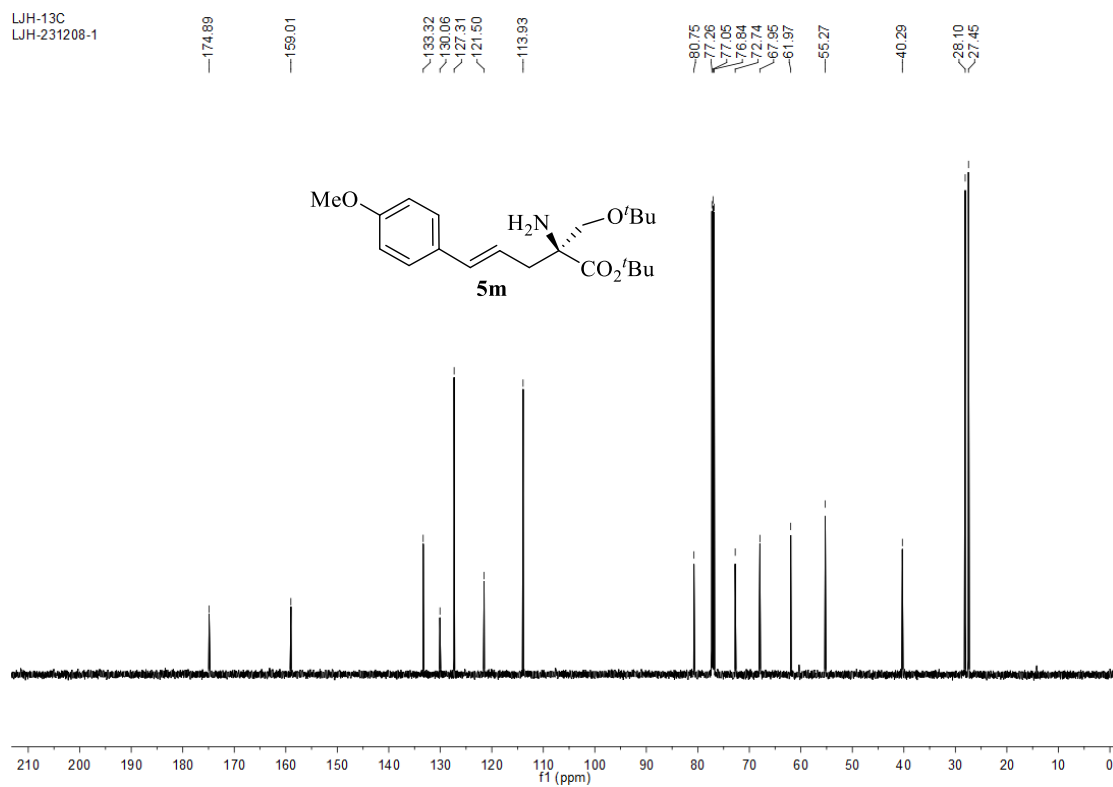

LJH-1H  
LJH-231213-1

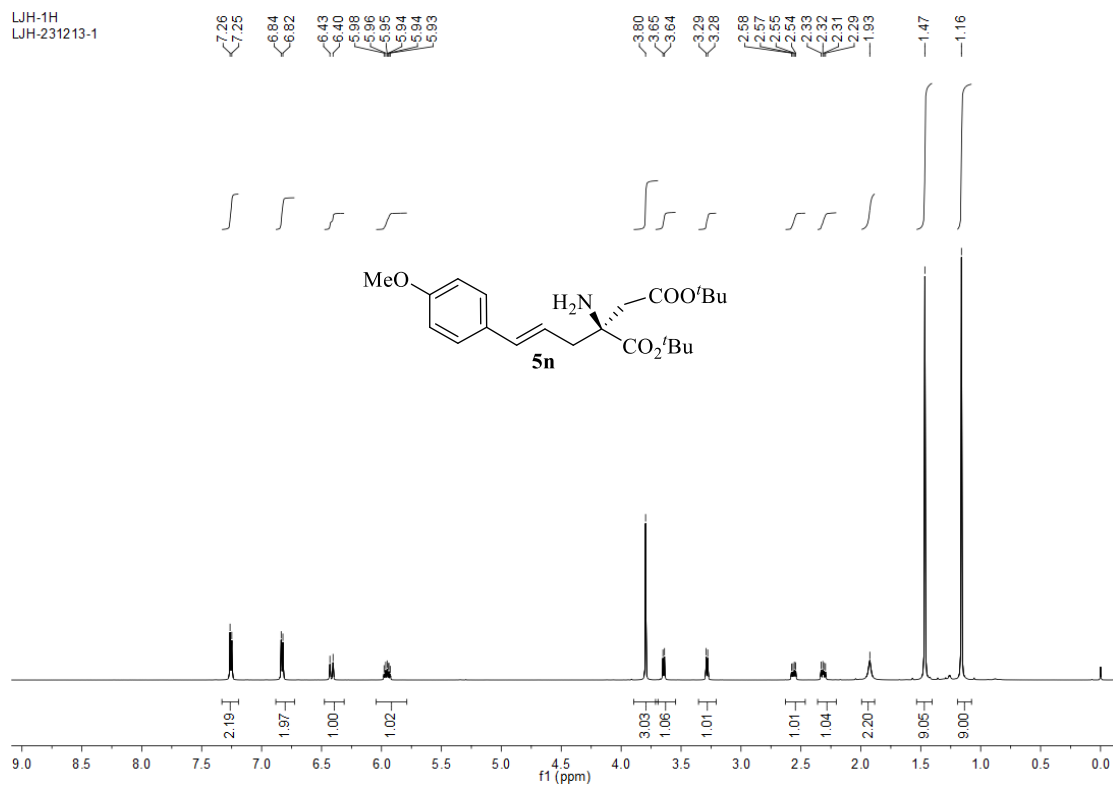

LJH-13C  
LJH-231313-1

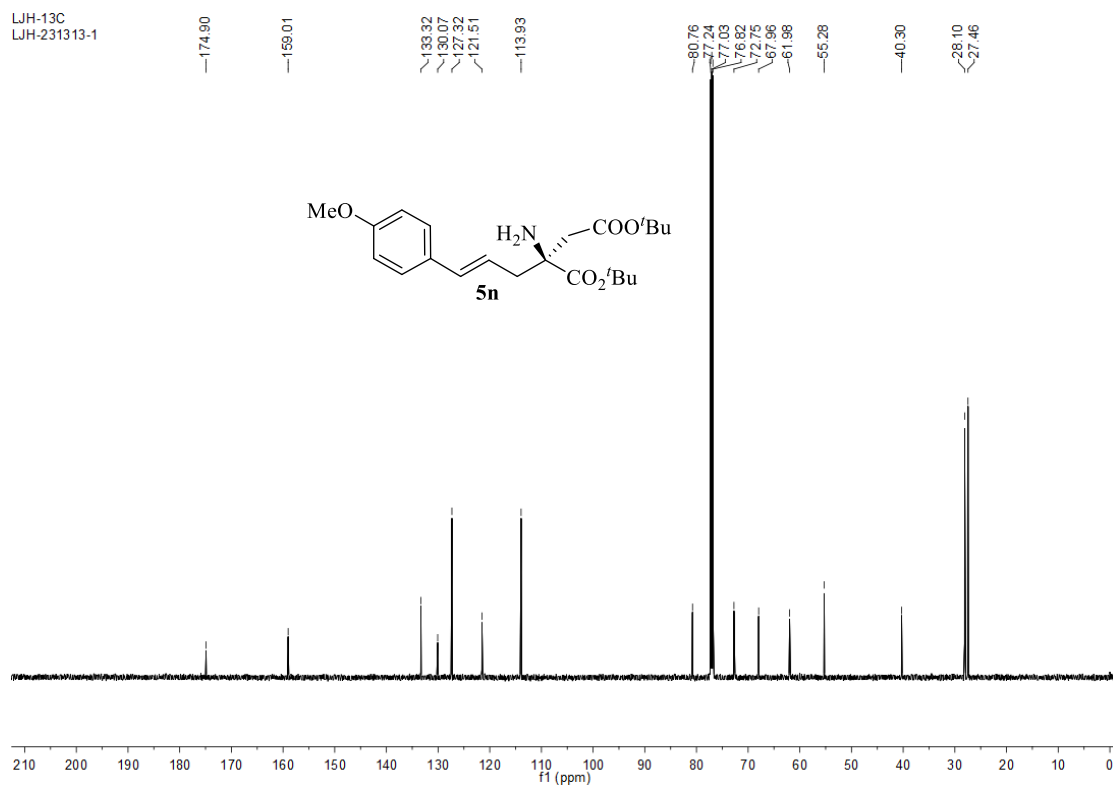

LJH-1H  
LJH-231211-1

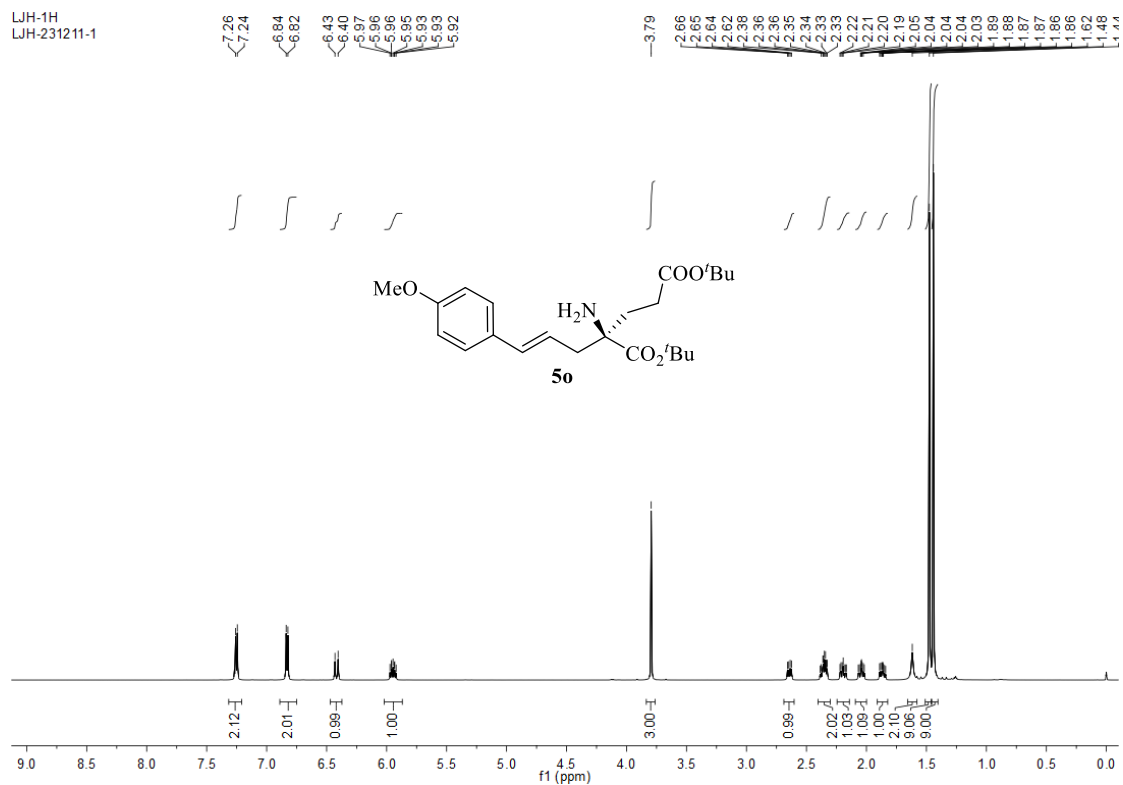

LJH-13C  
LJH-231211-1

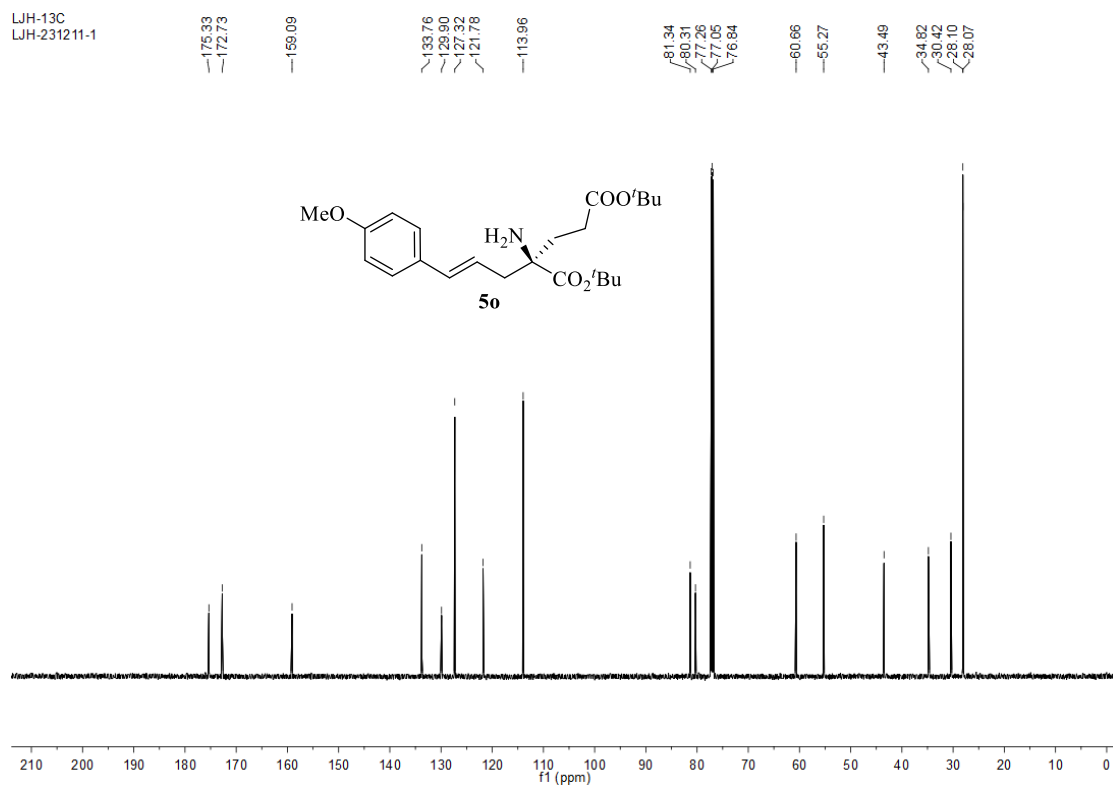

Supplement: d4sc02594f1.pdf [file d4sc02594f1.pdf]
